# Supplementary figures and images for: Chromenol Derivatives as Novel Antifungal Agents: Synthesis, In Silico and In Vitro Evaluation
Source: MDPI journal article supplement (doi:10.3390/molecules26144304), 2021-07-16

3A

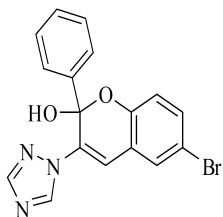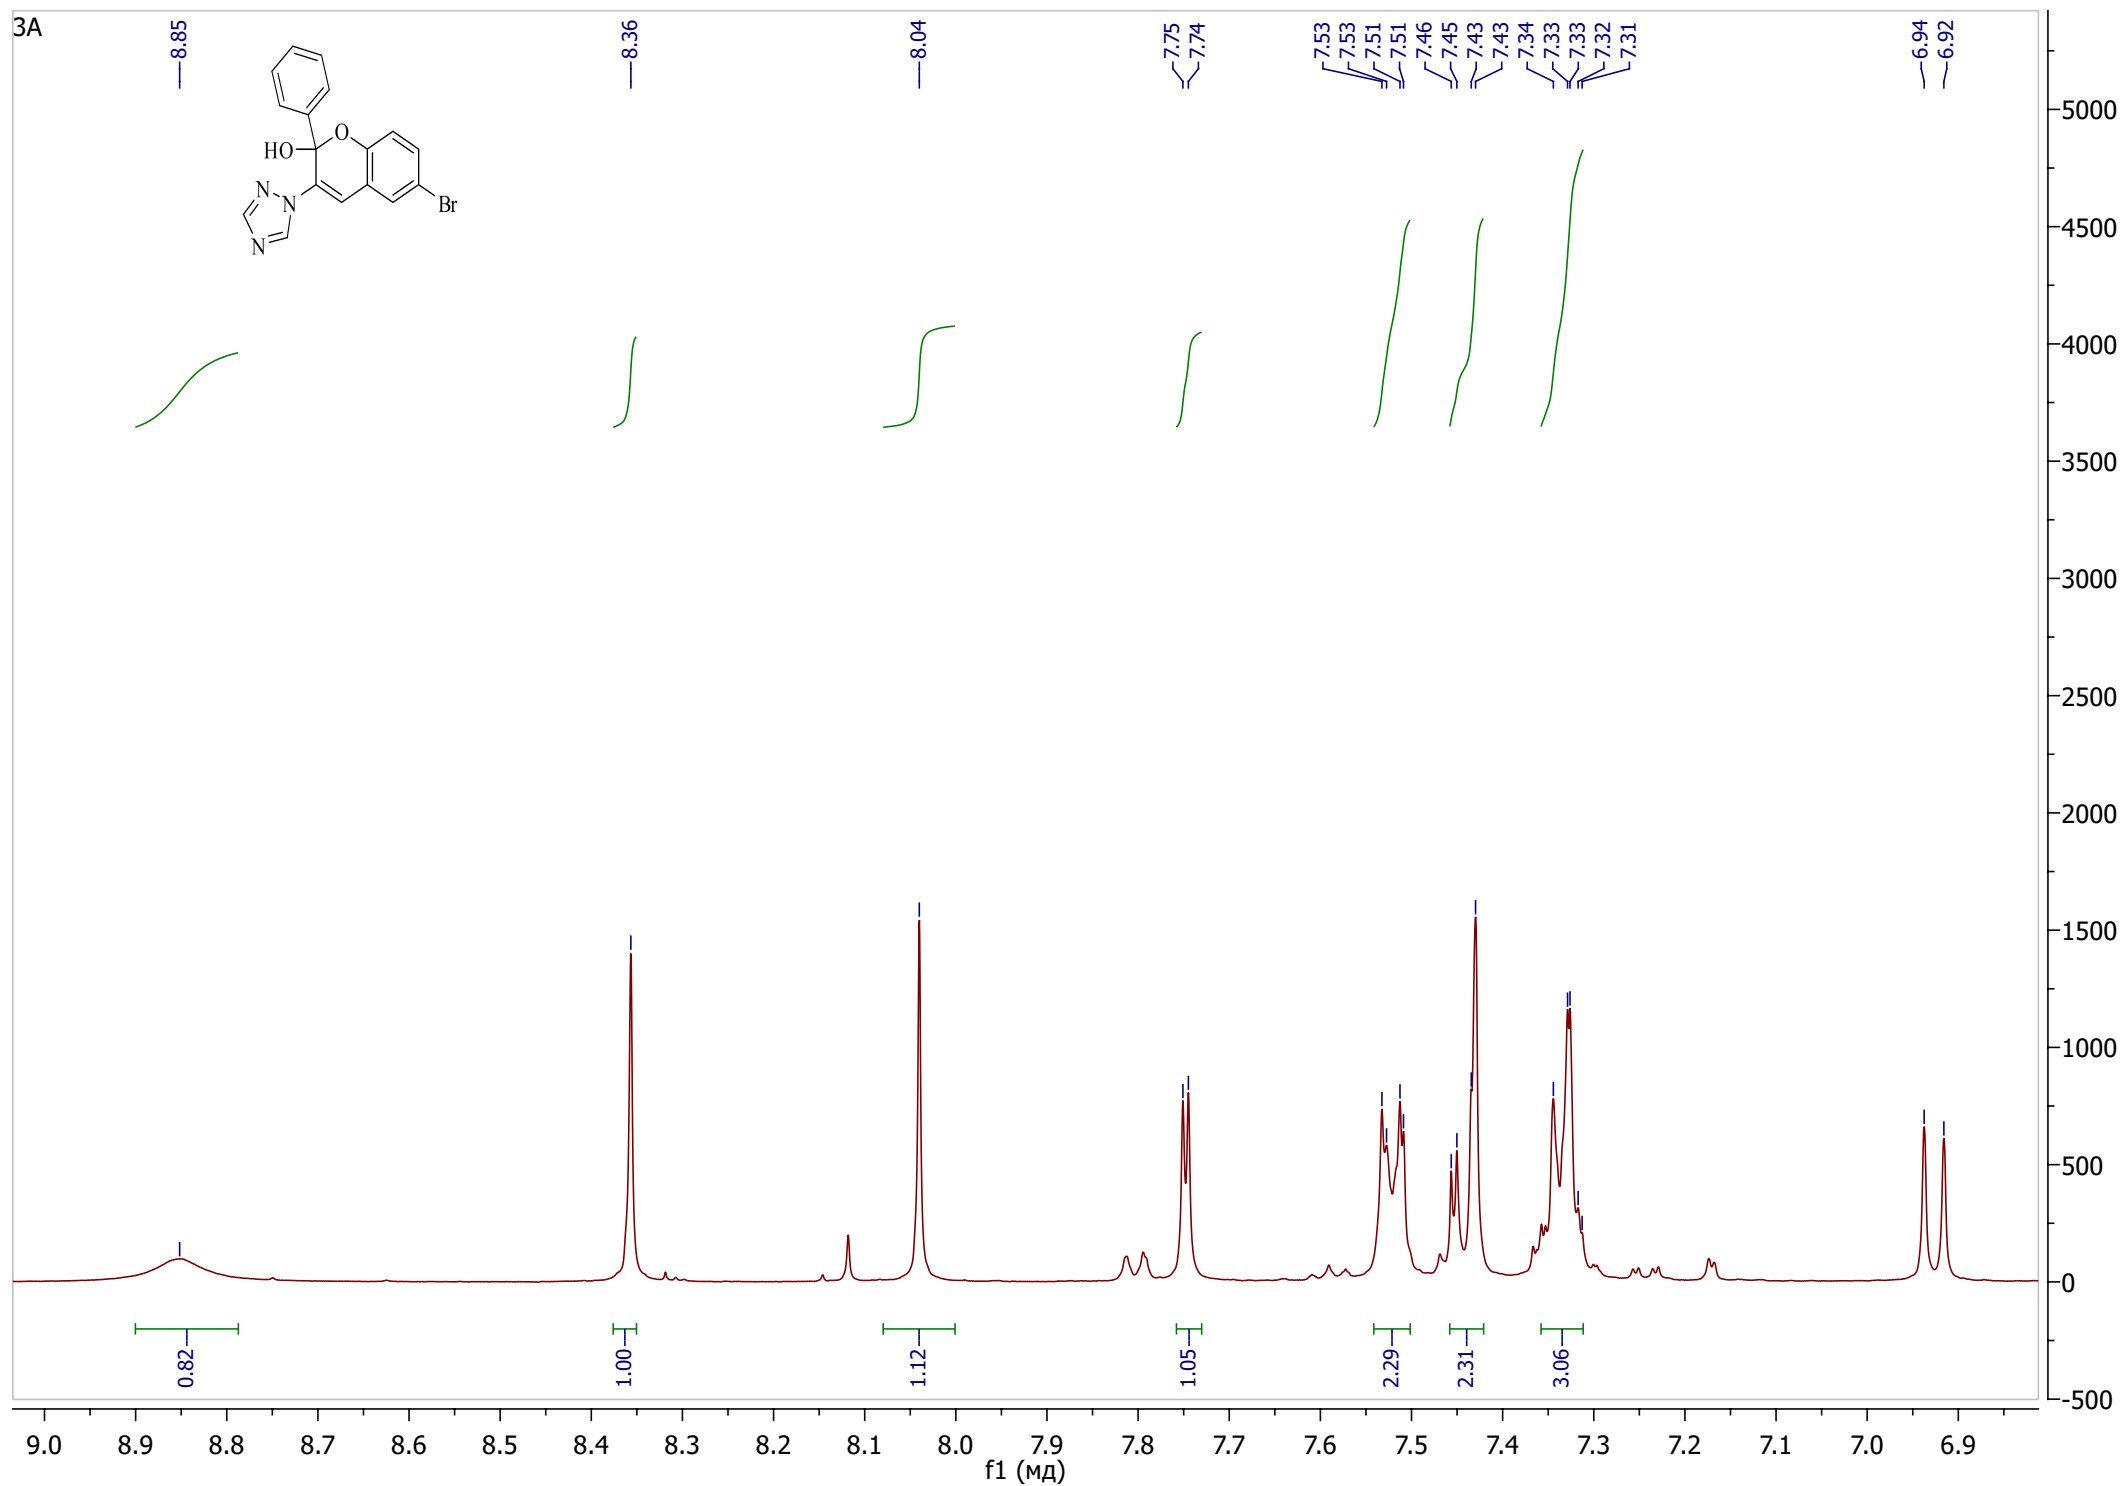

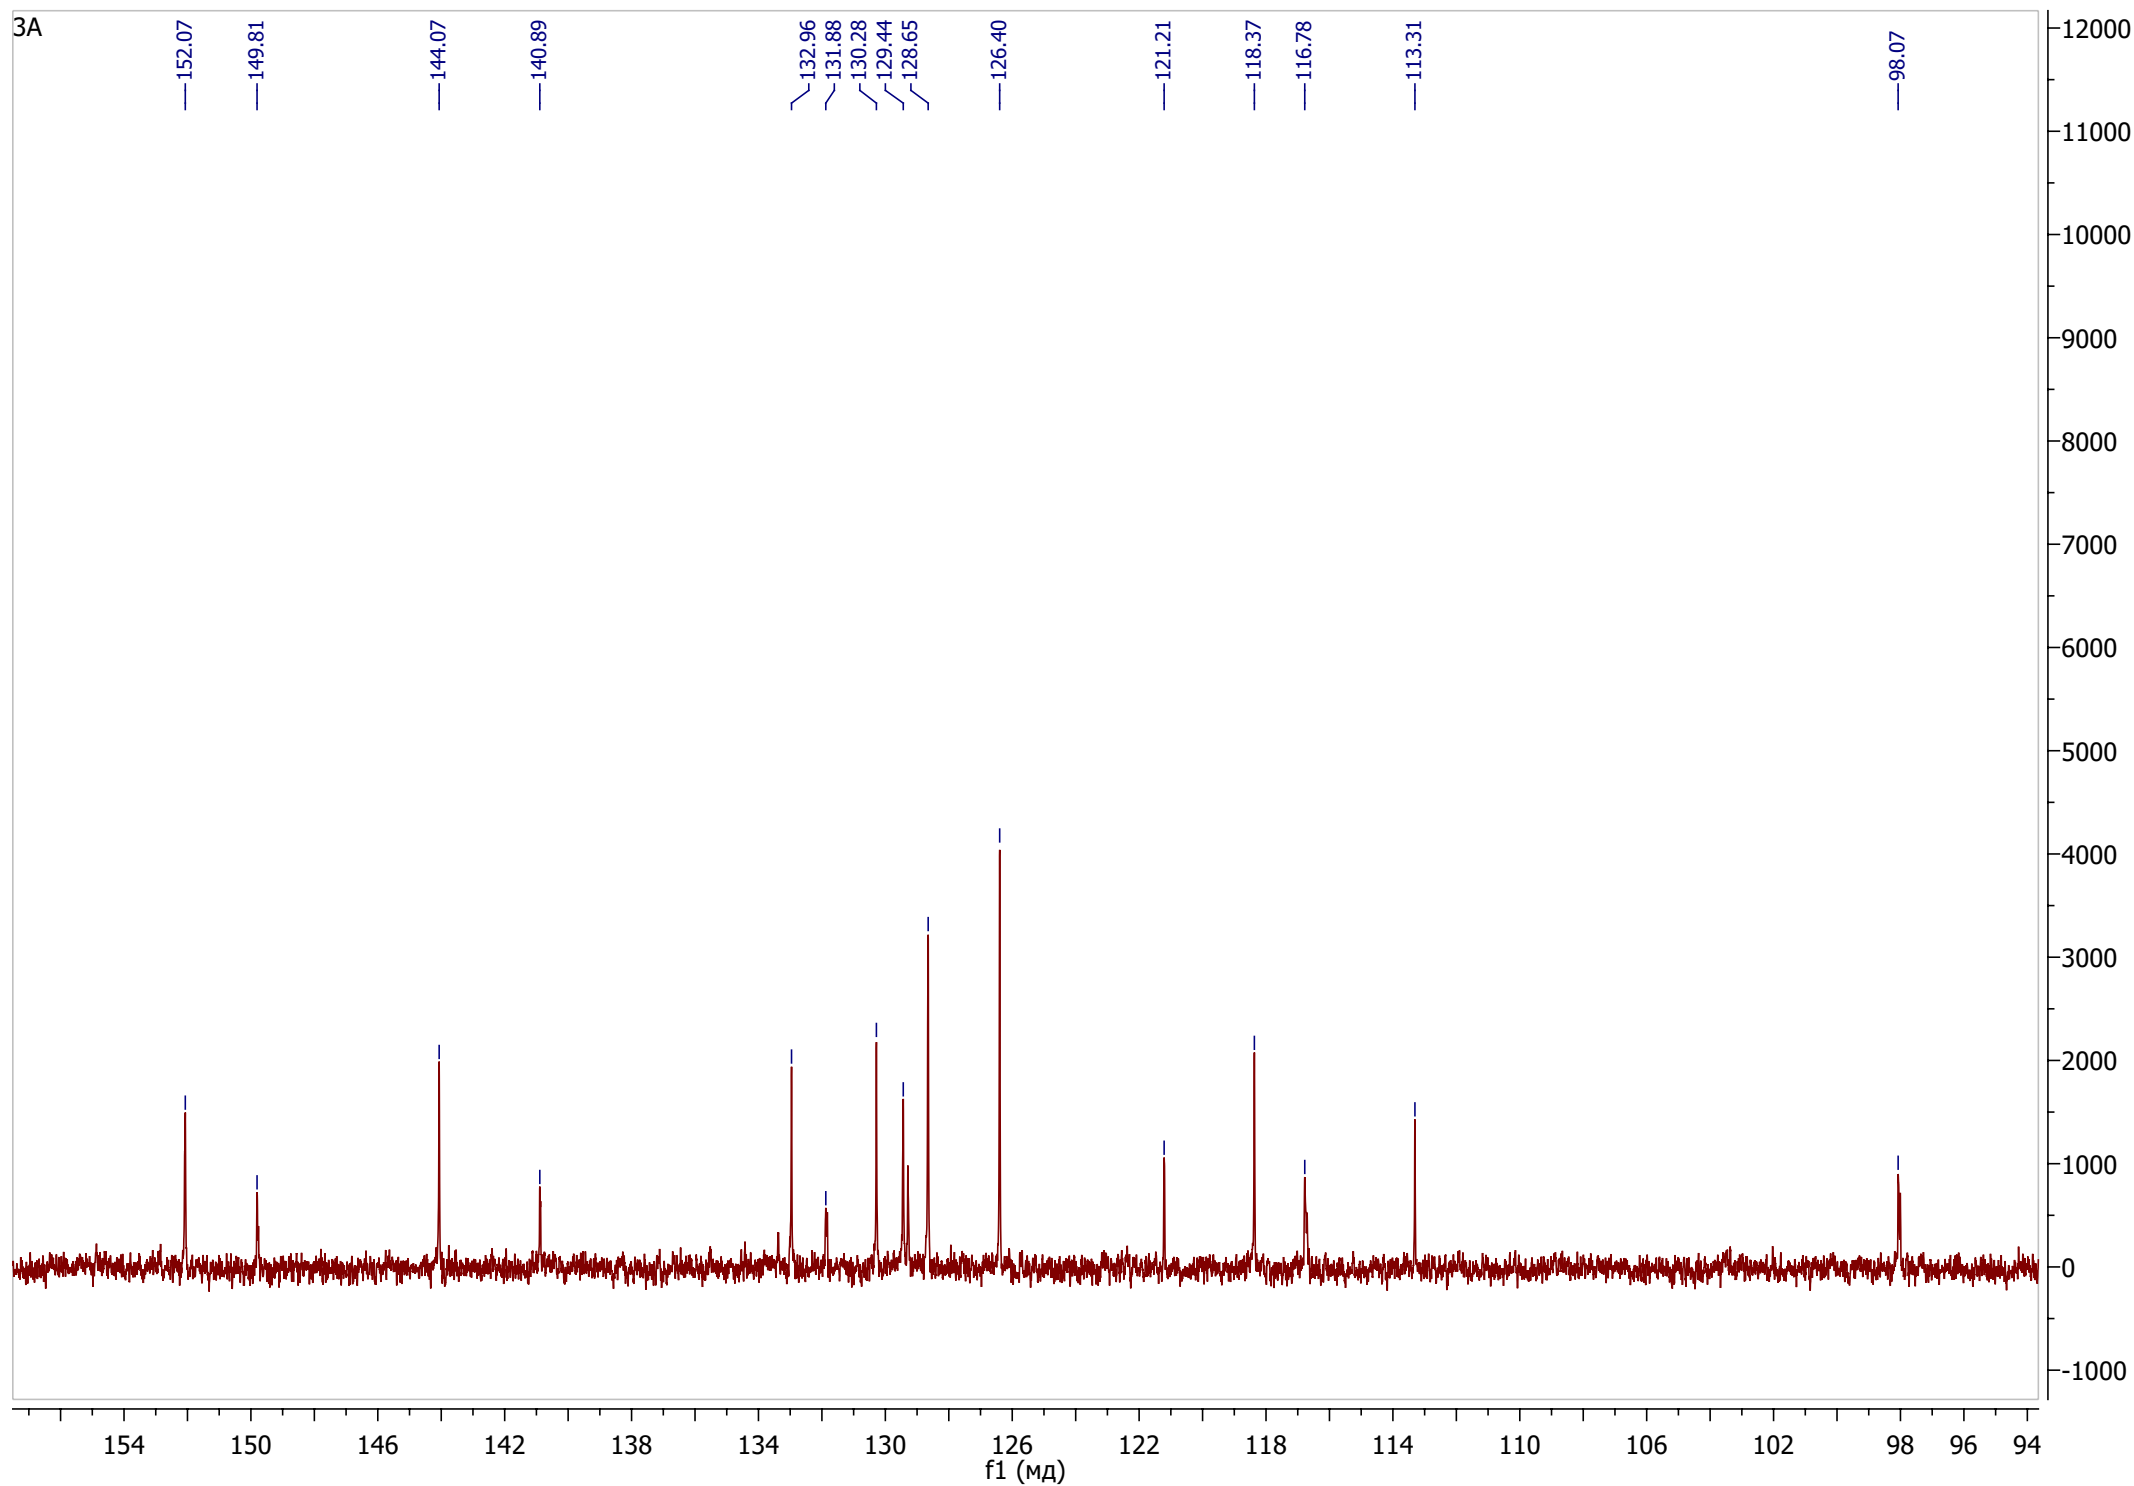

3B

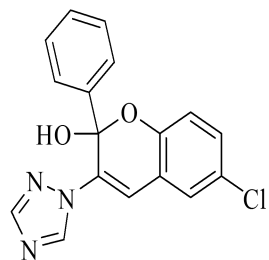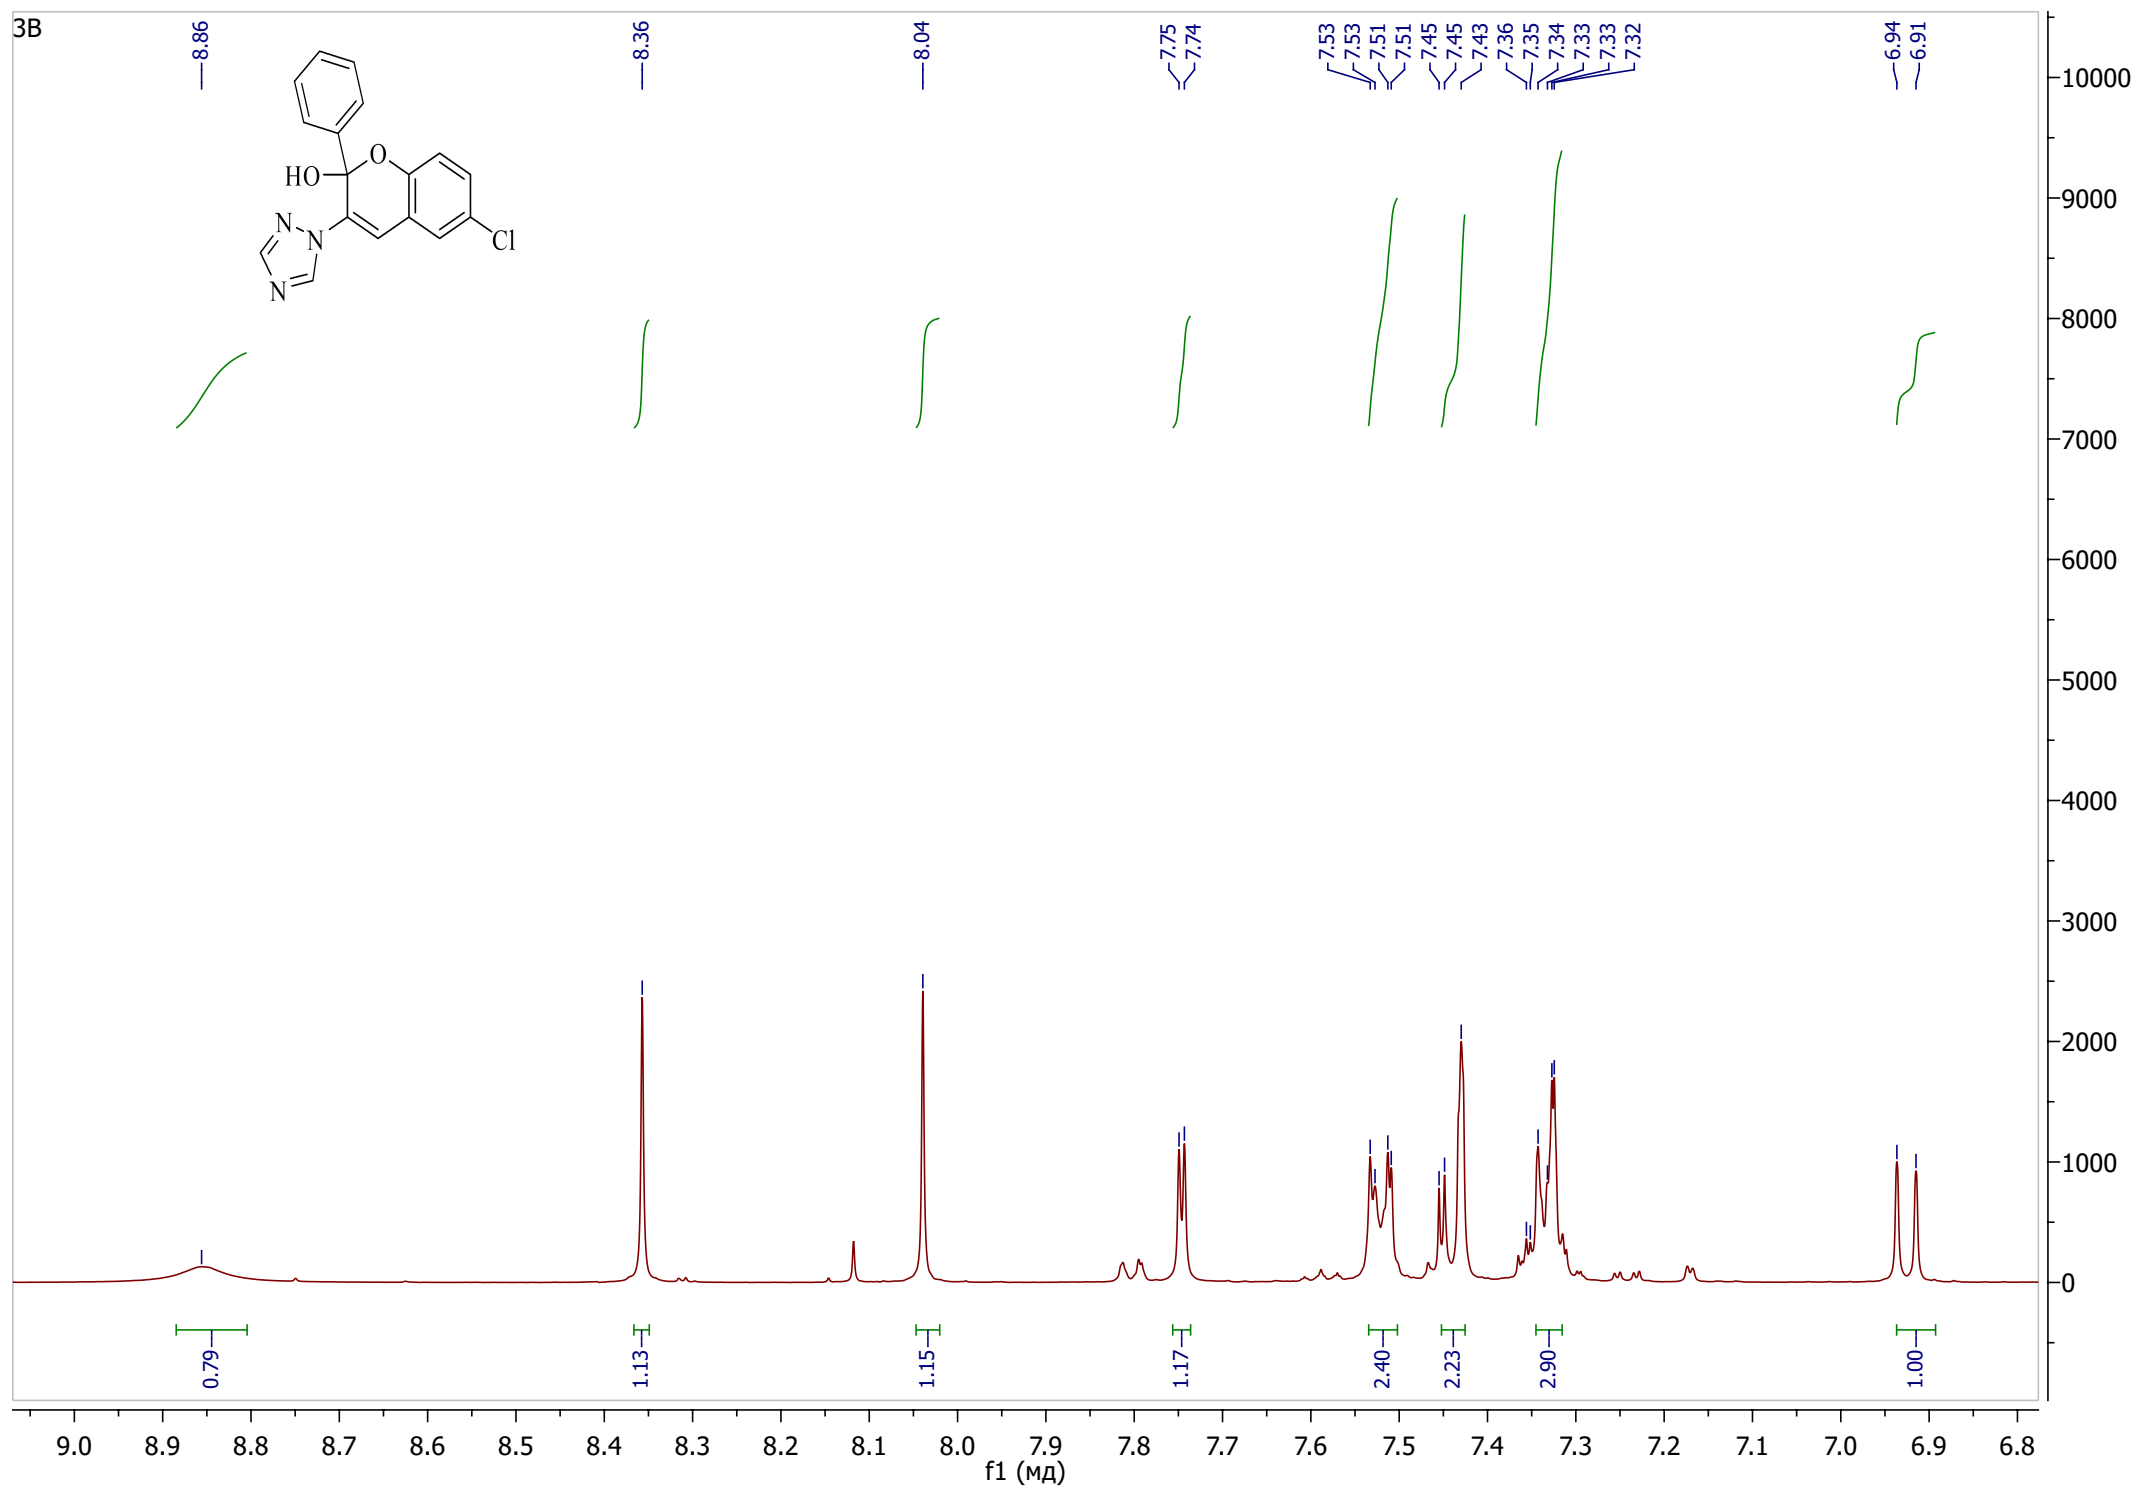

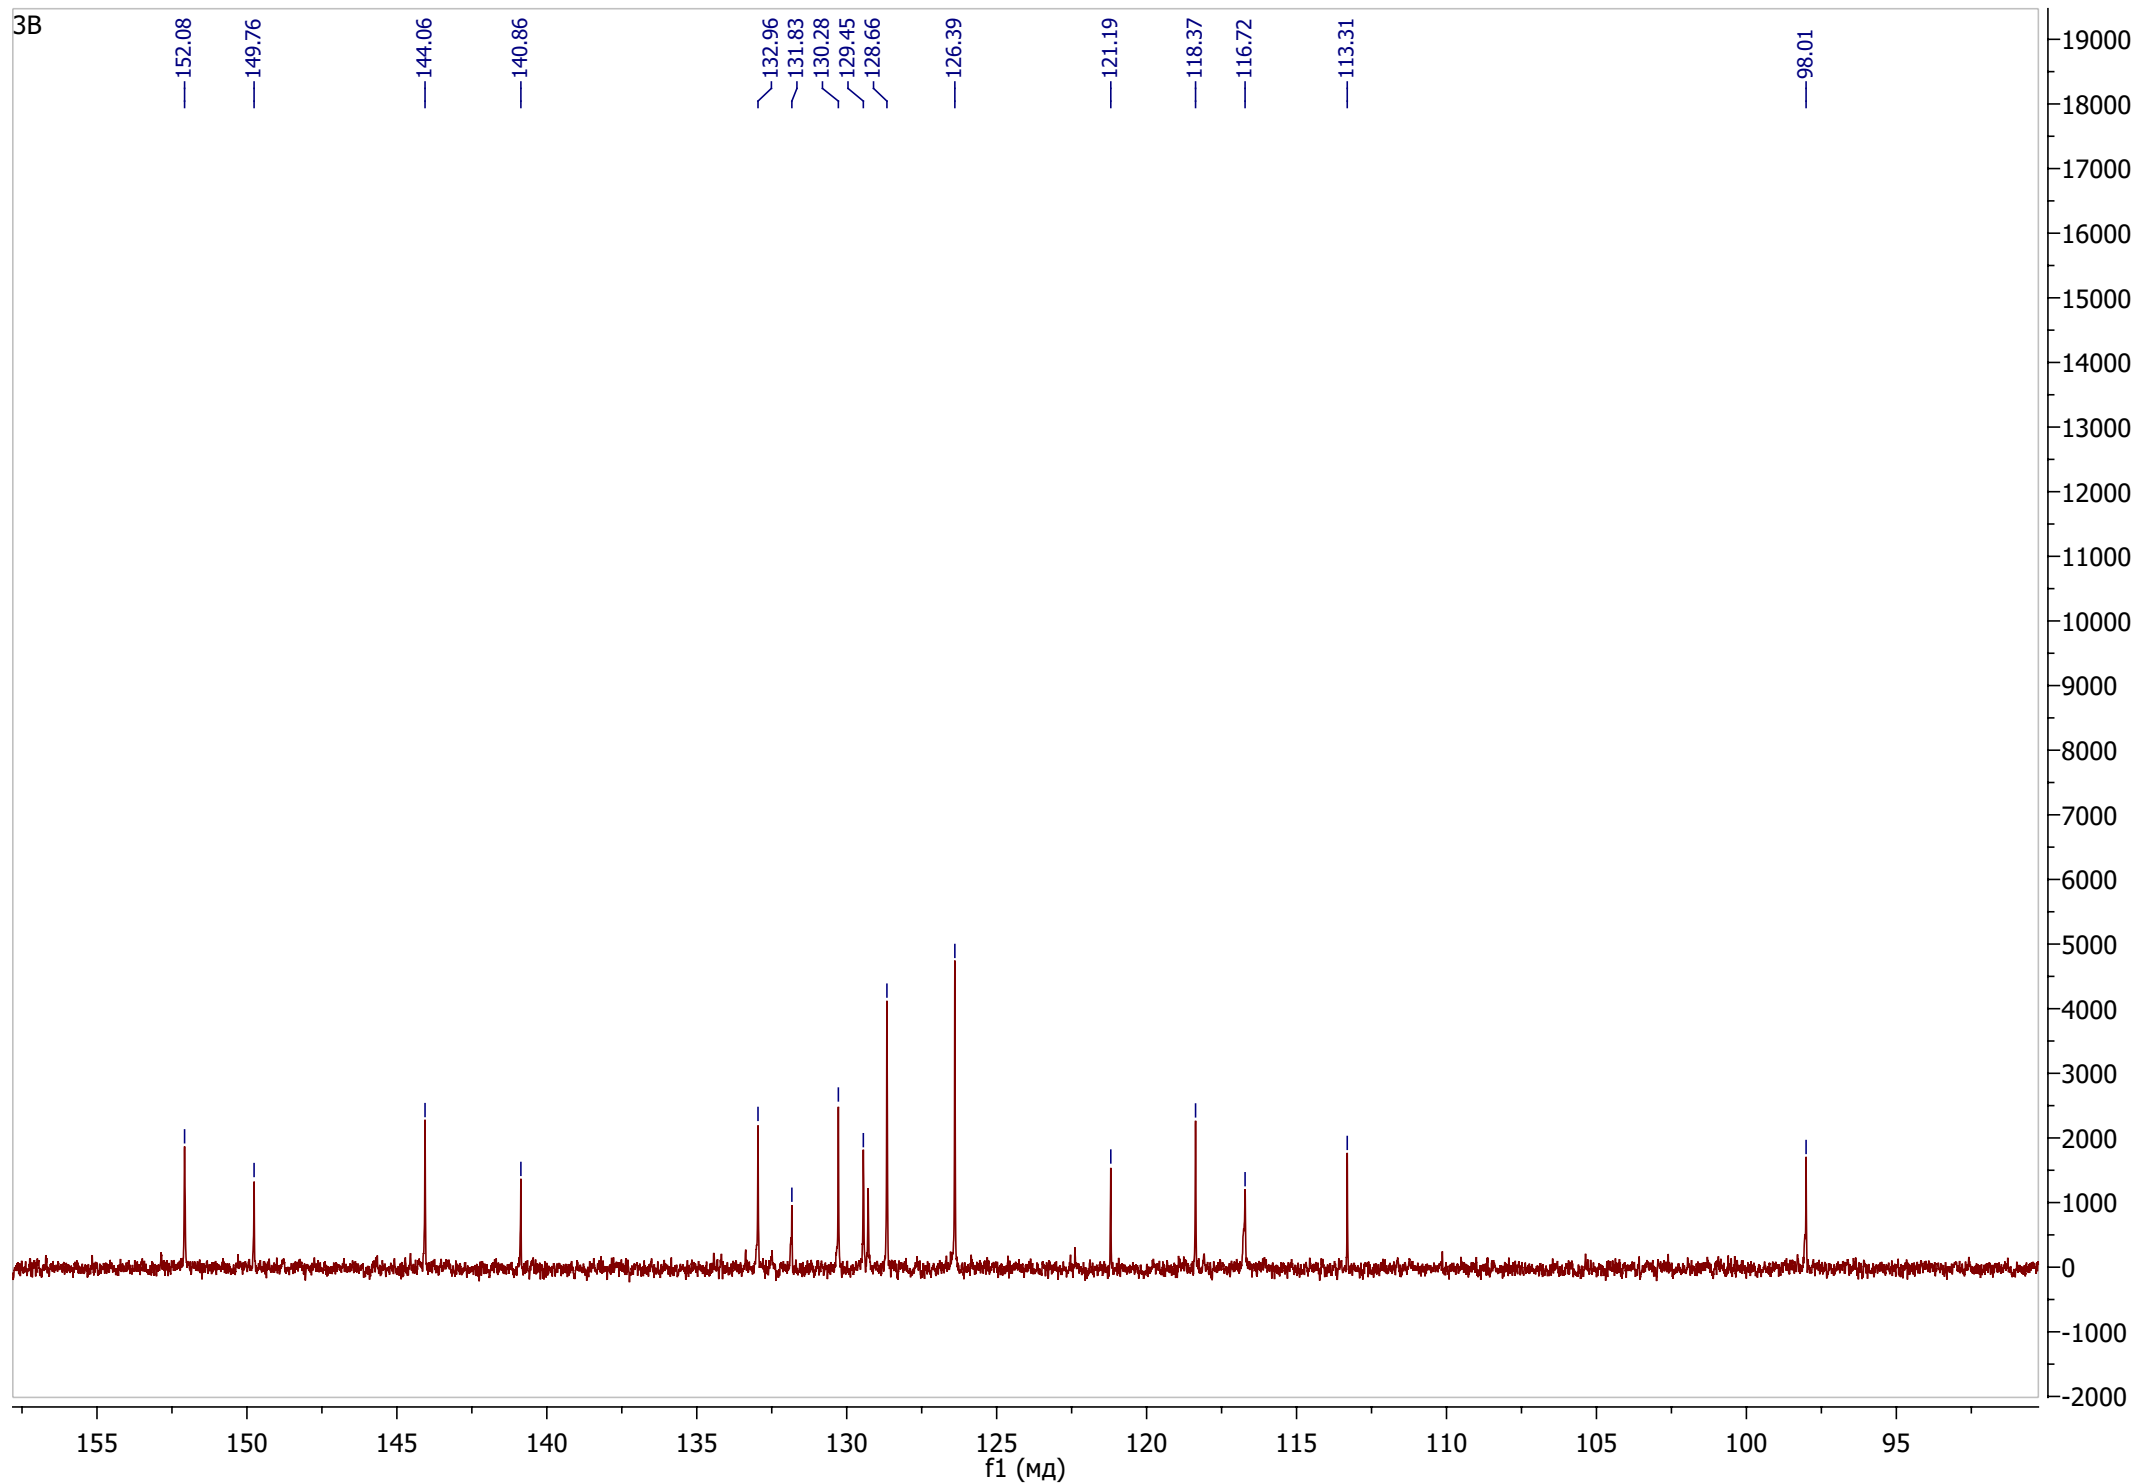

3C

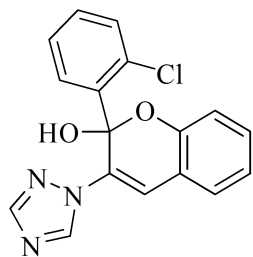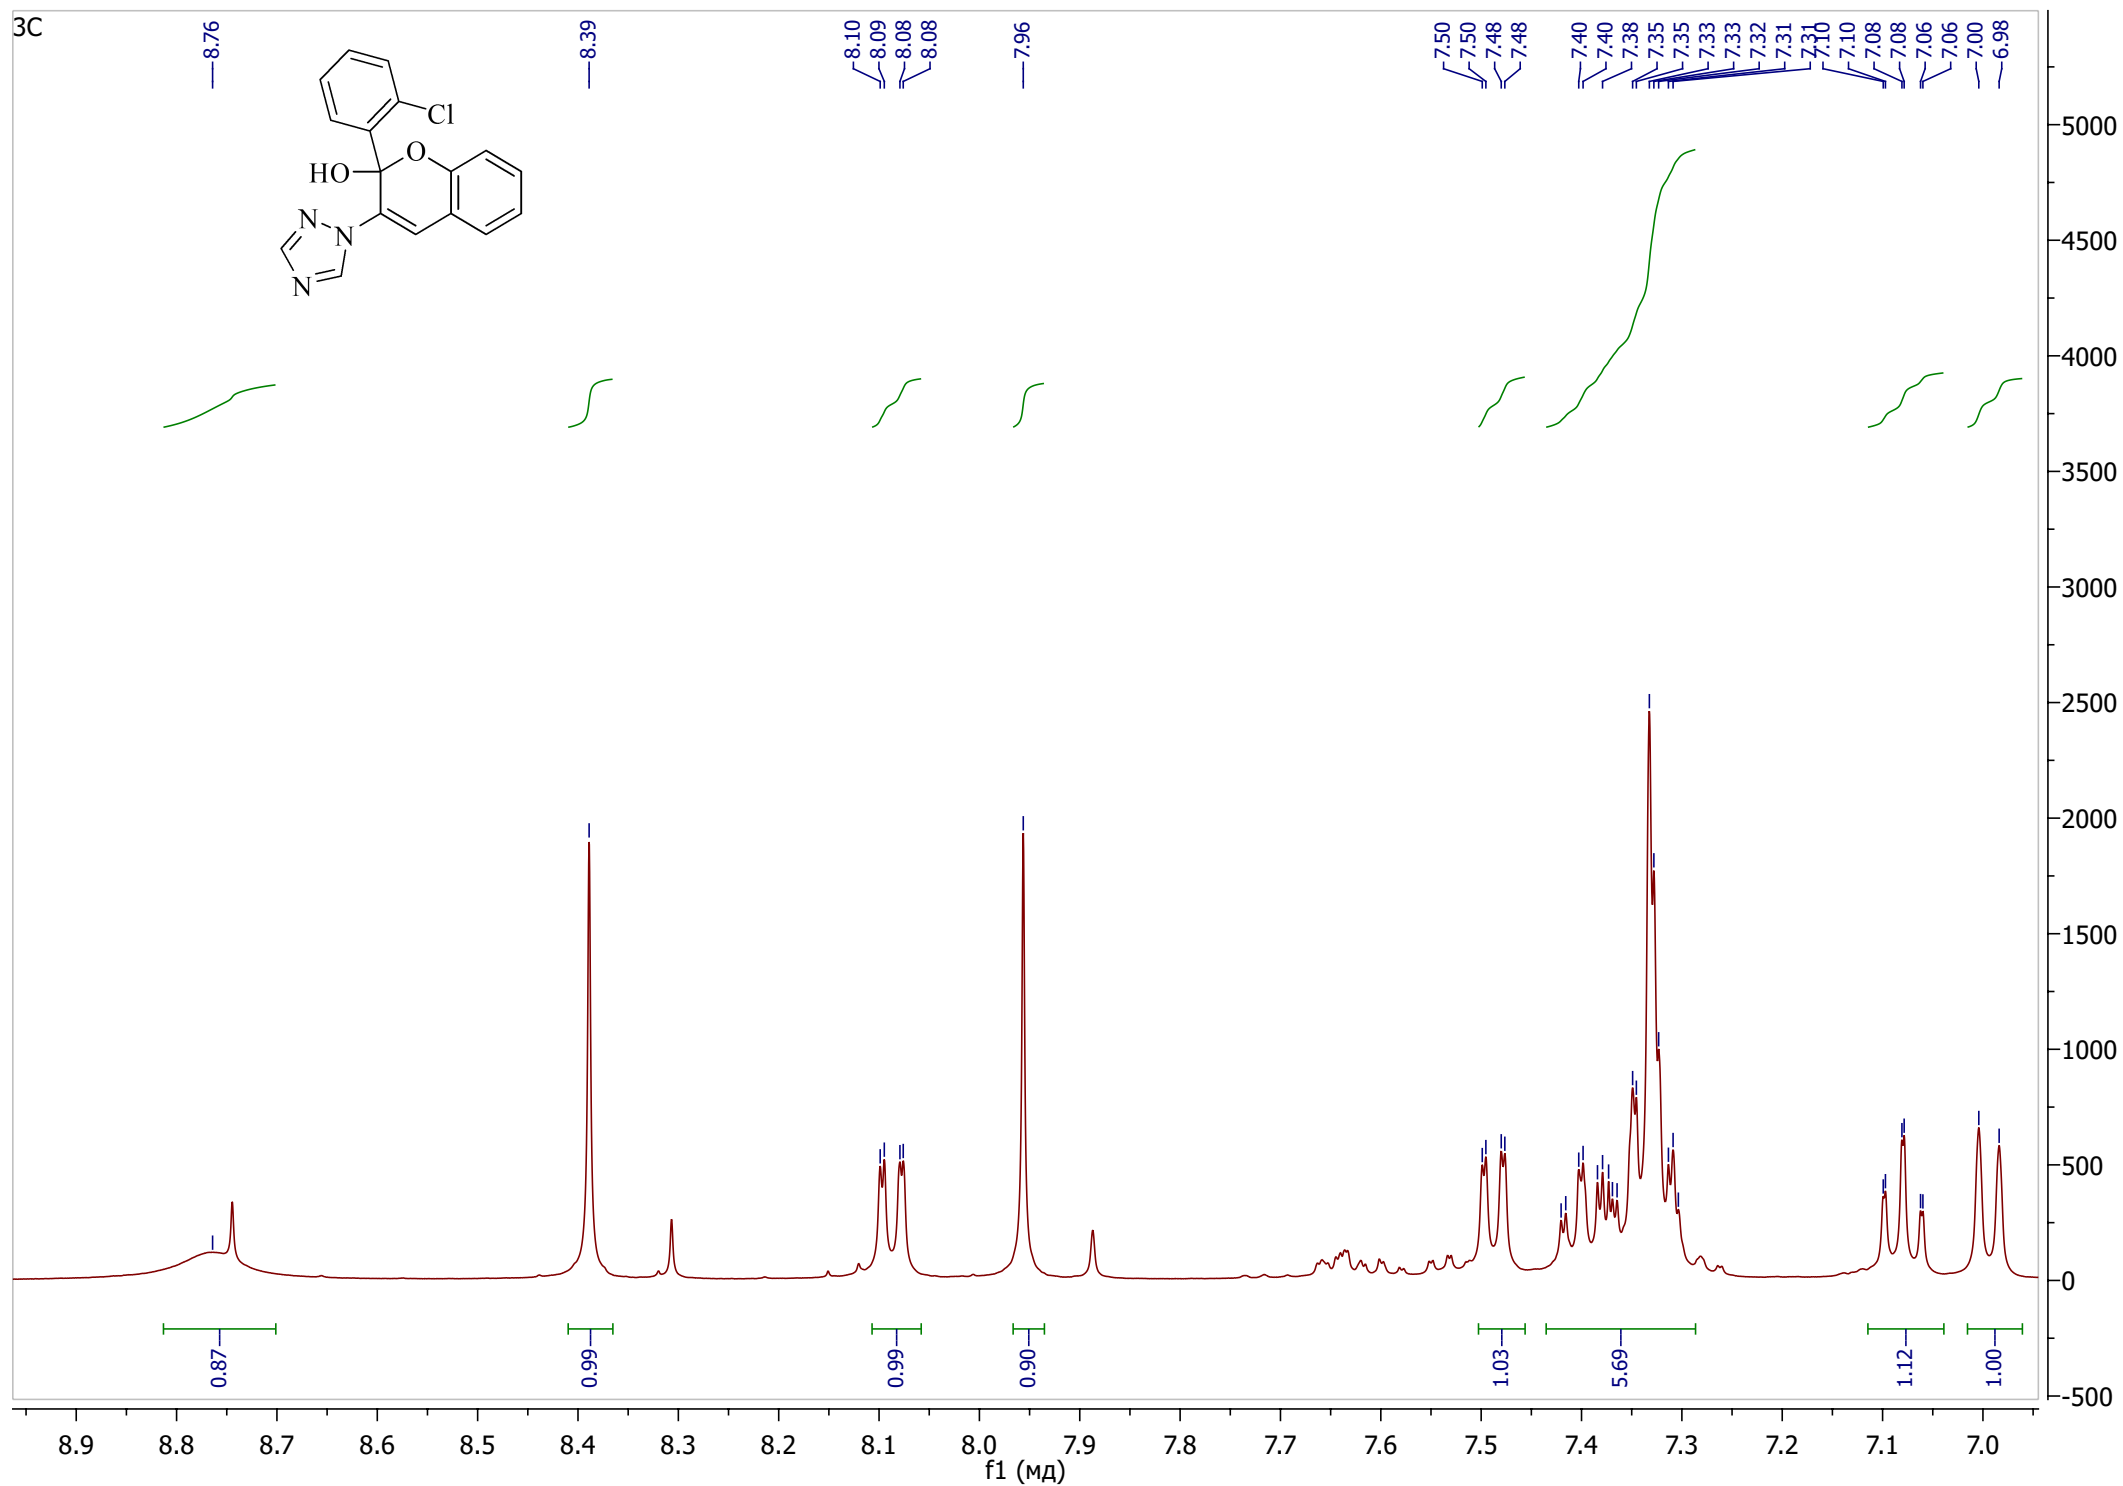

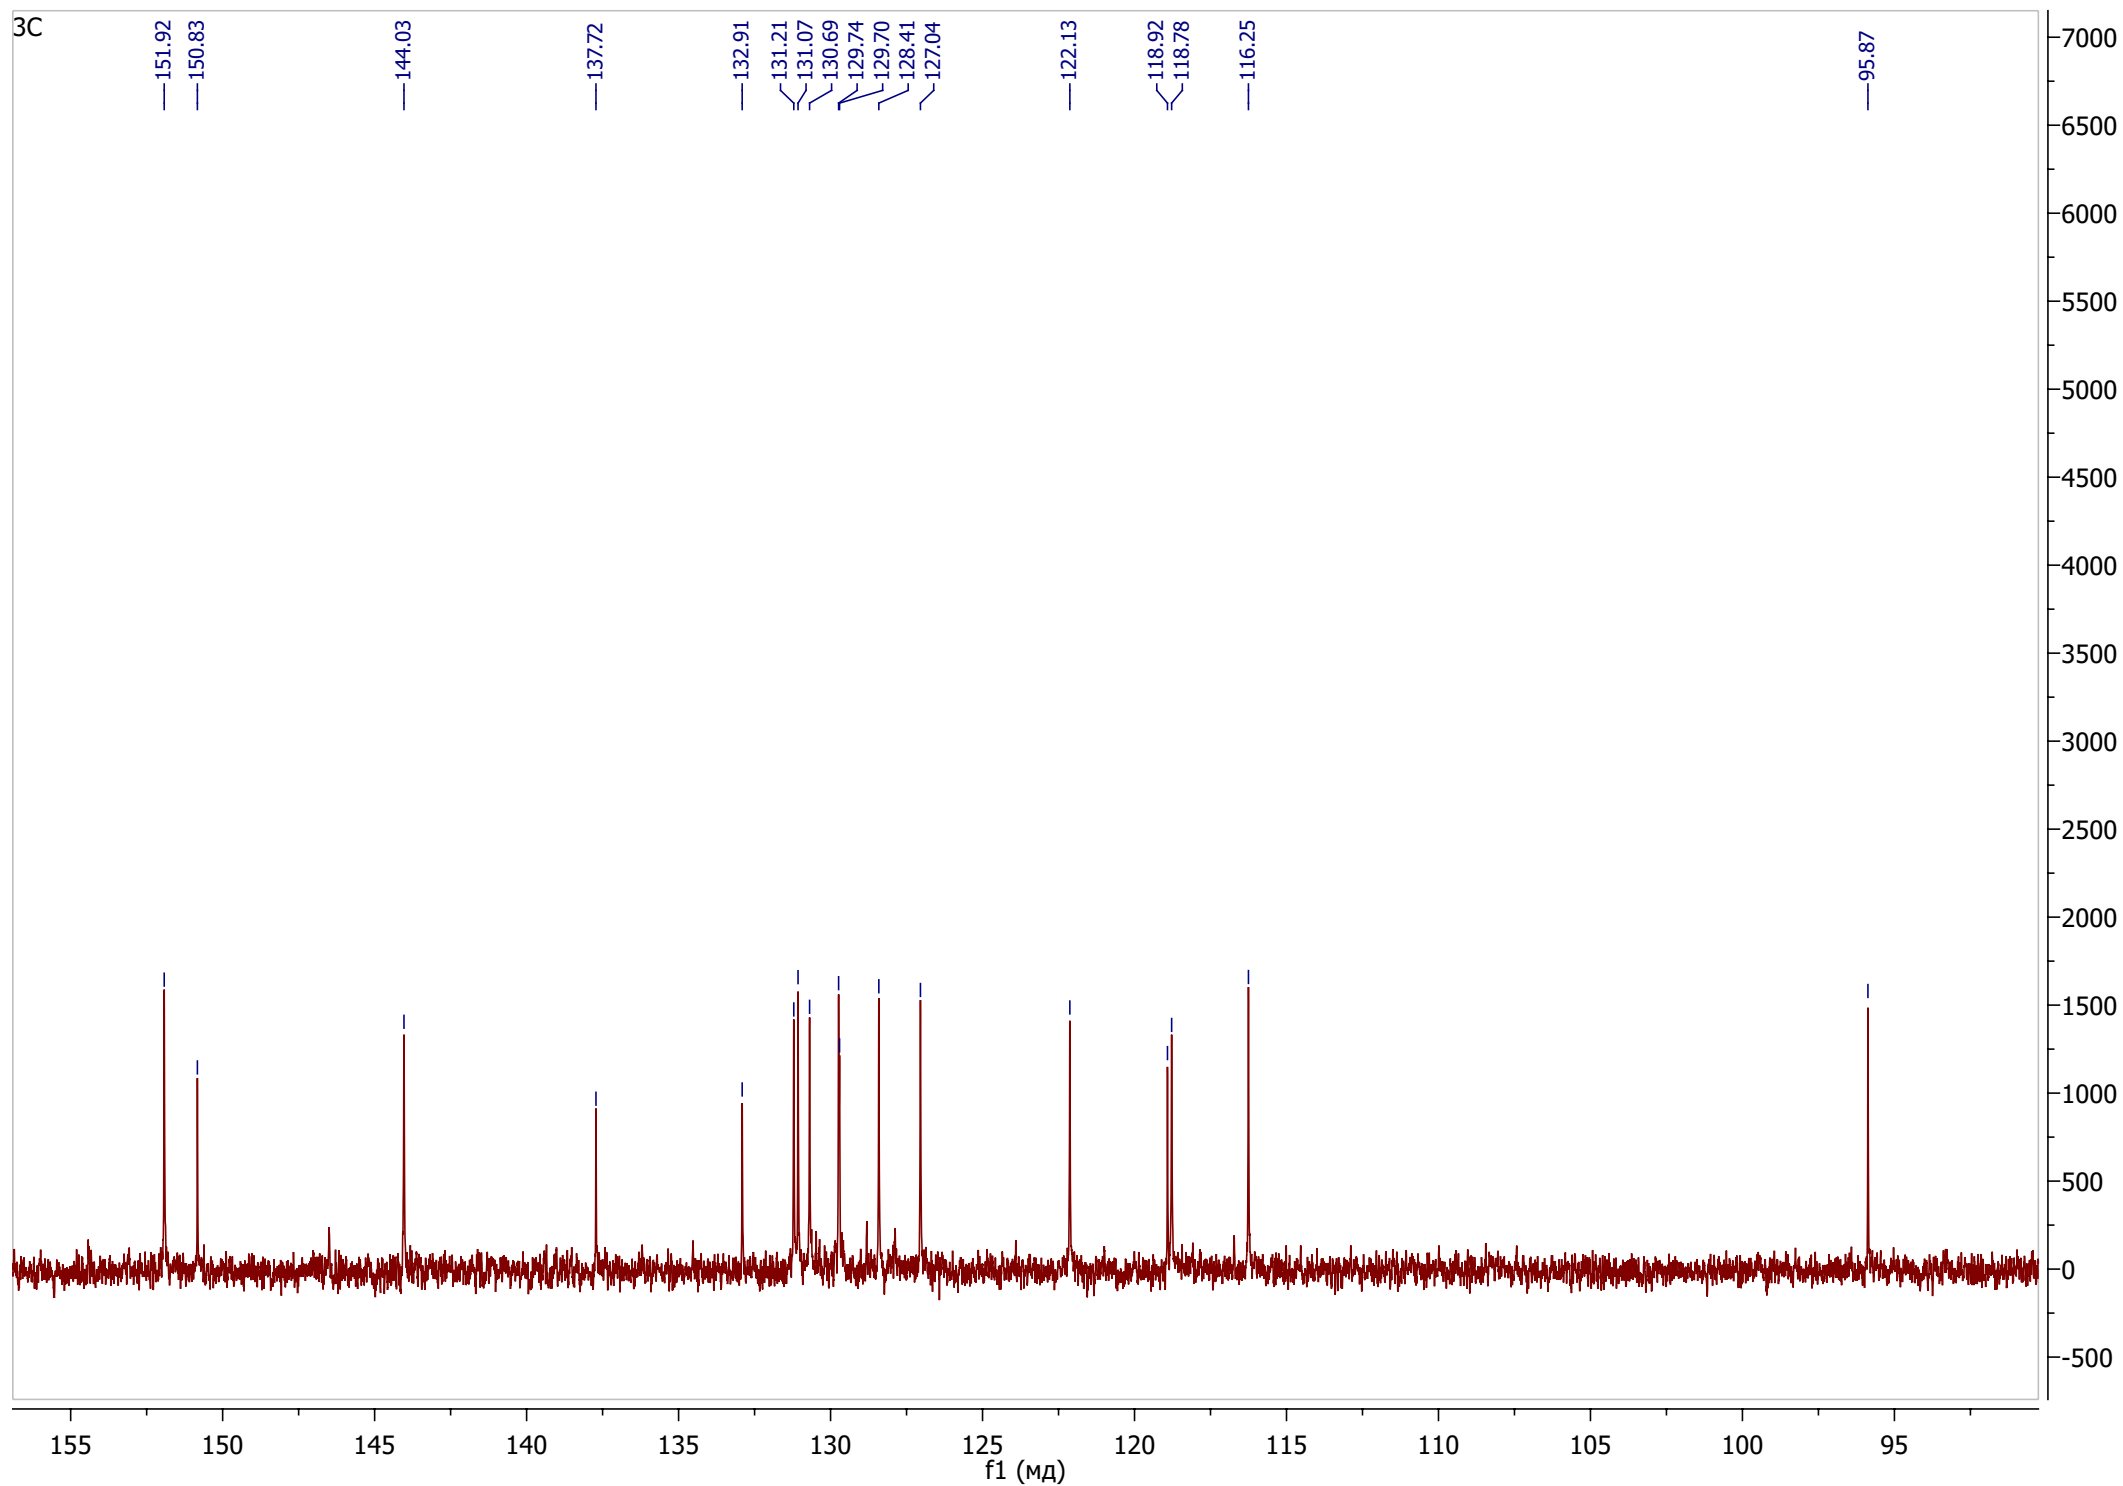

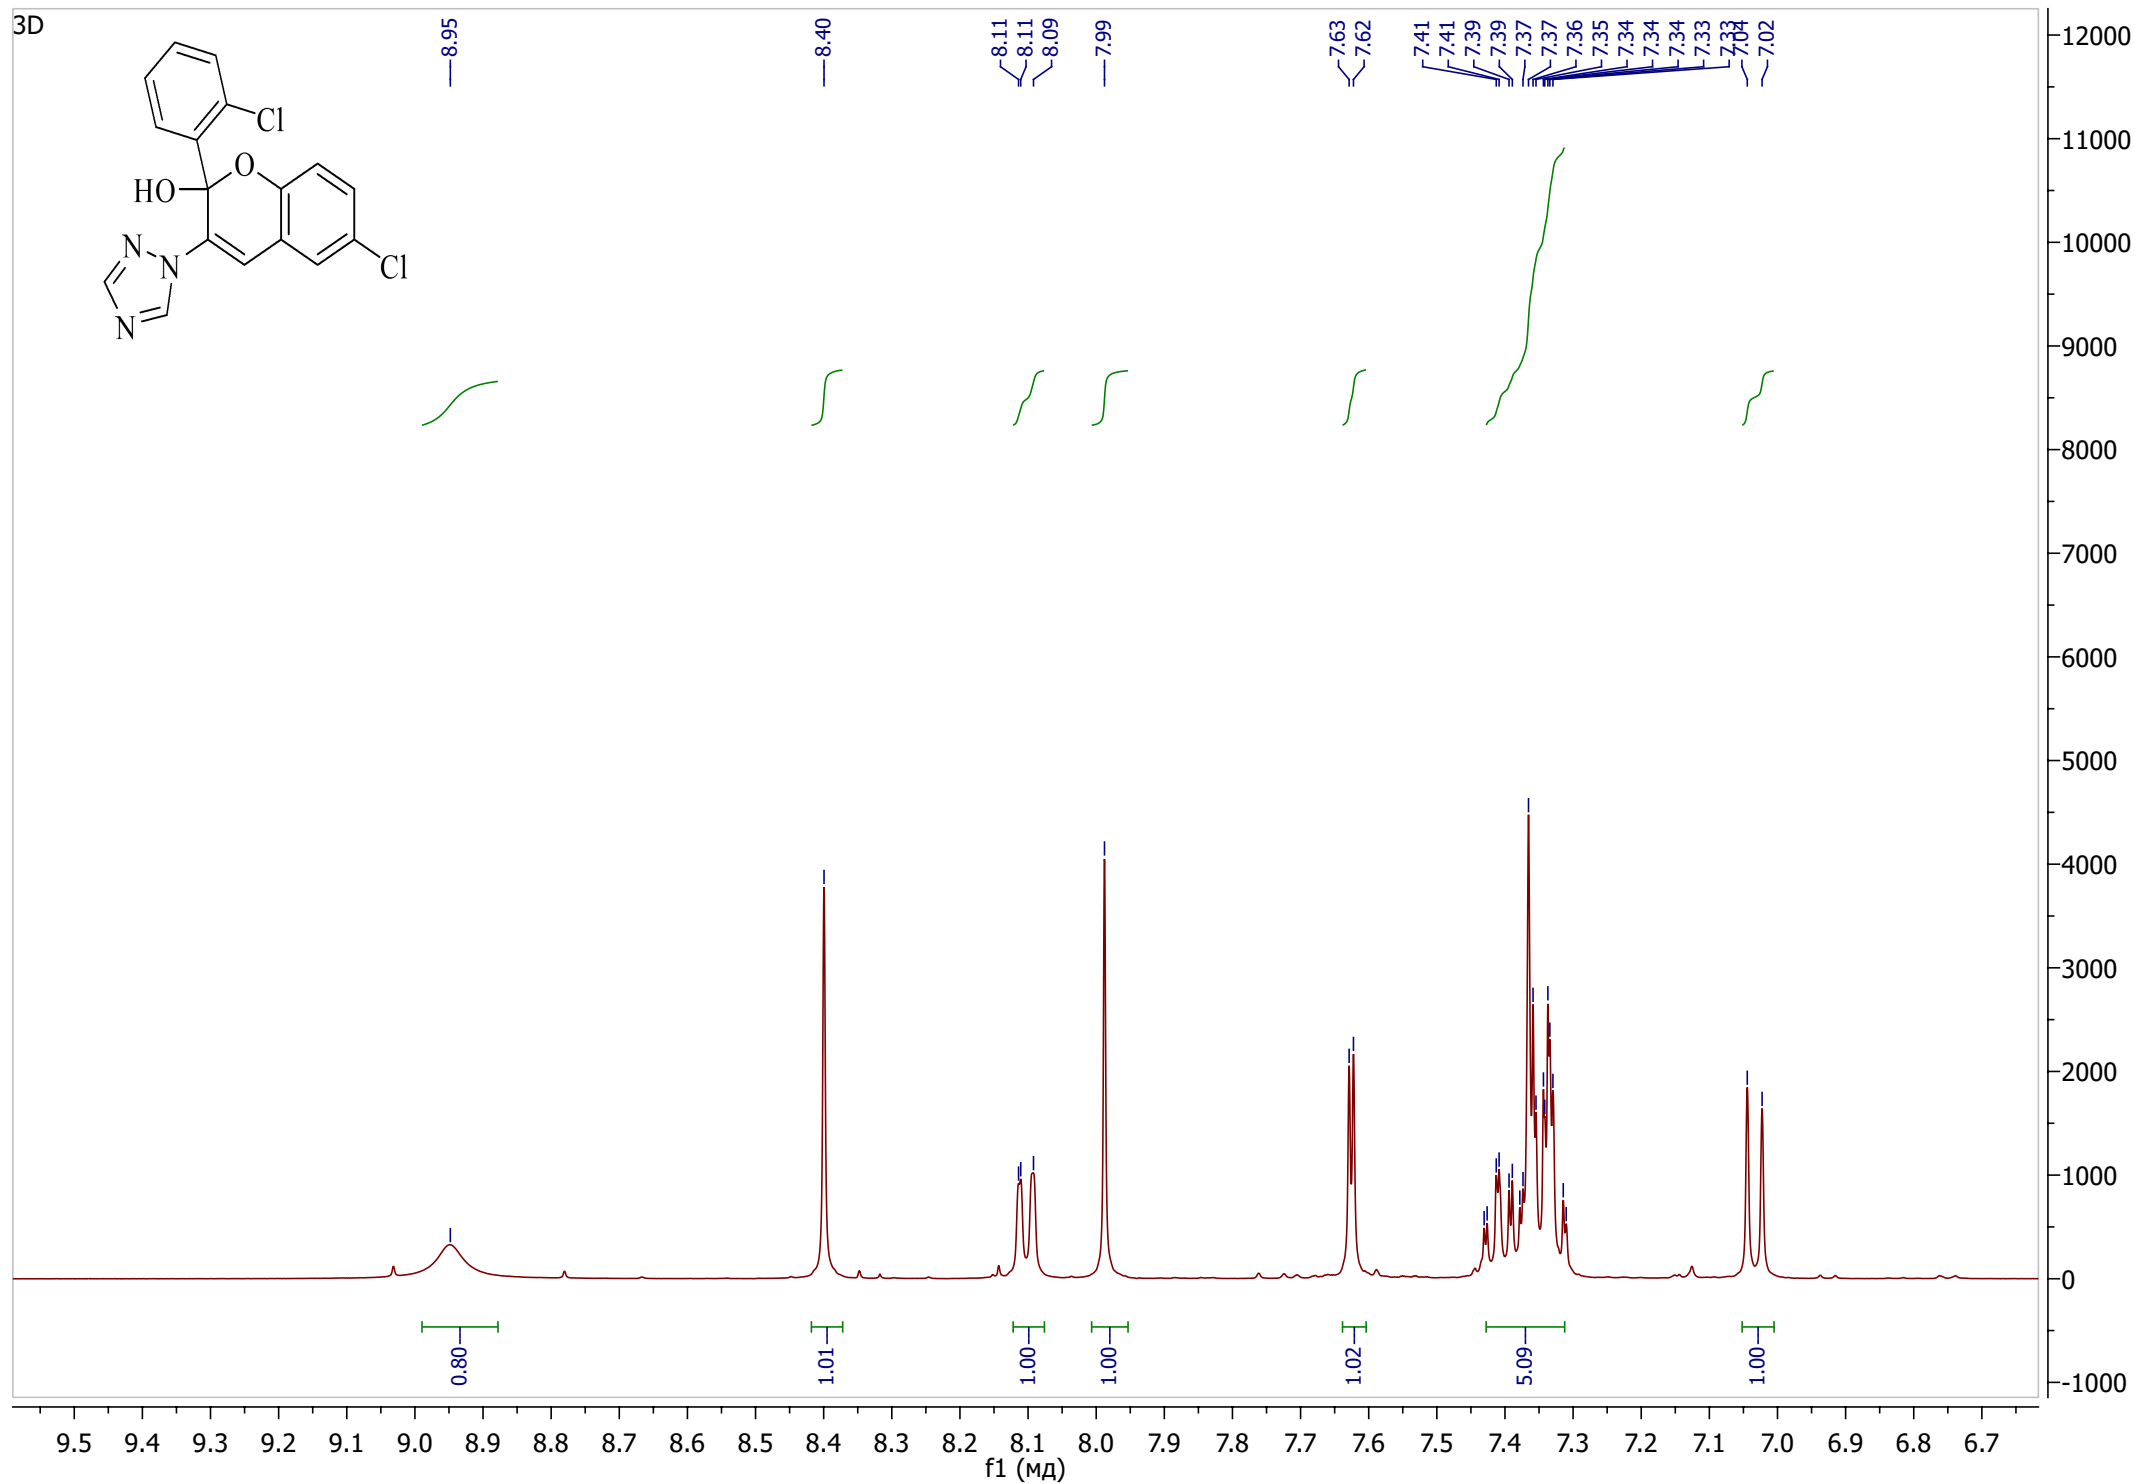

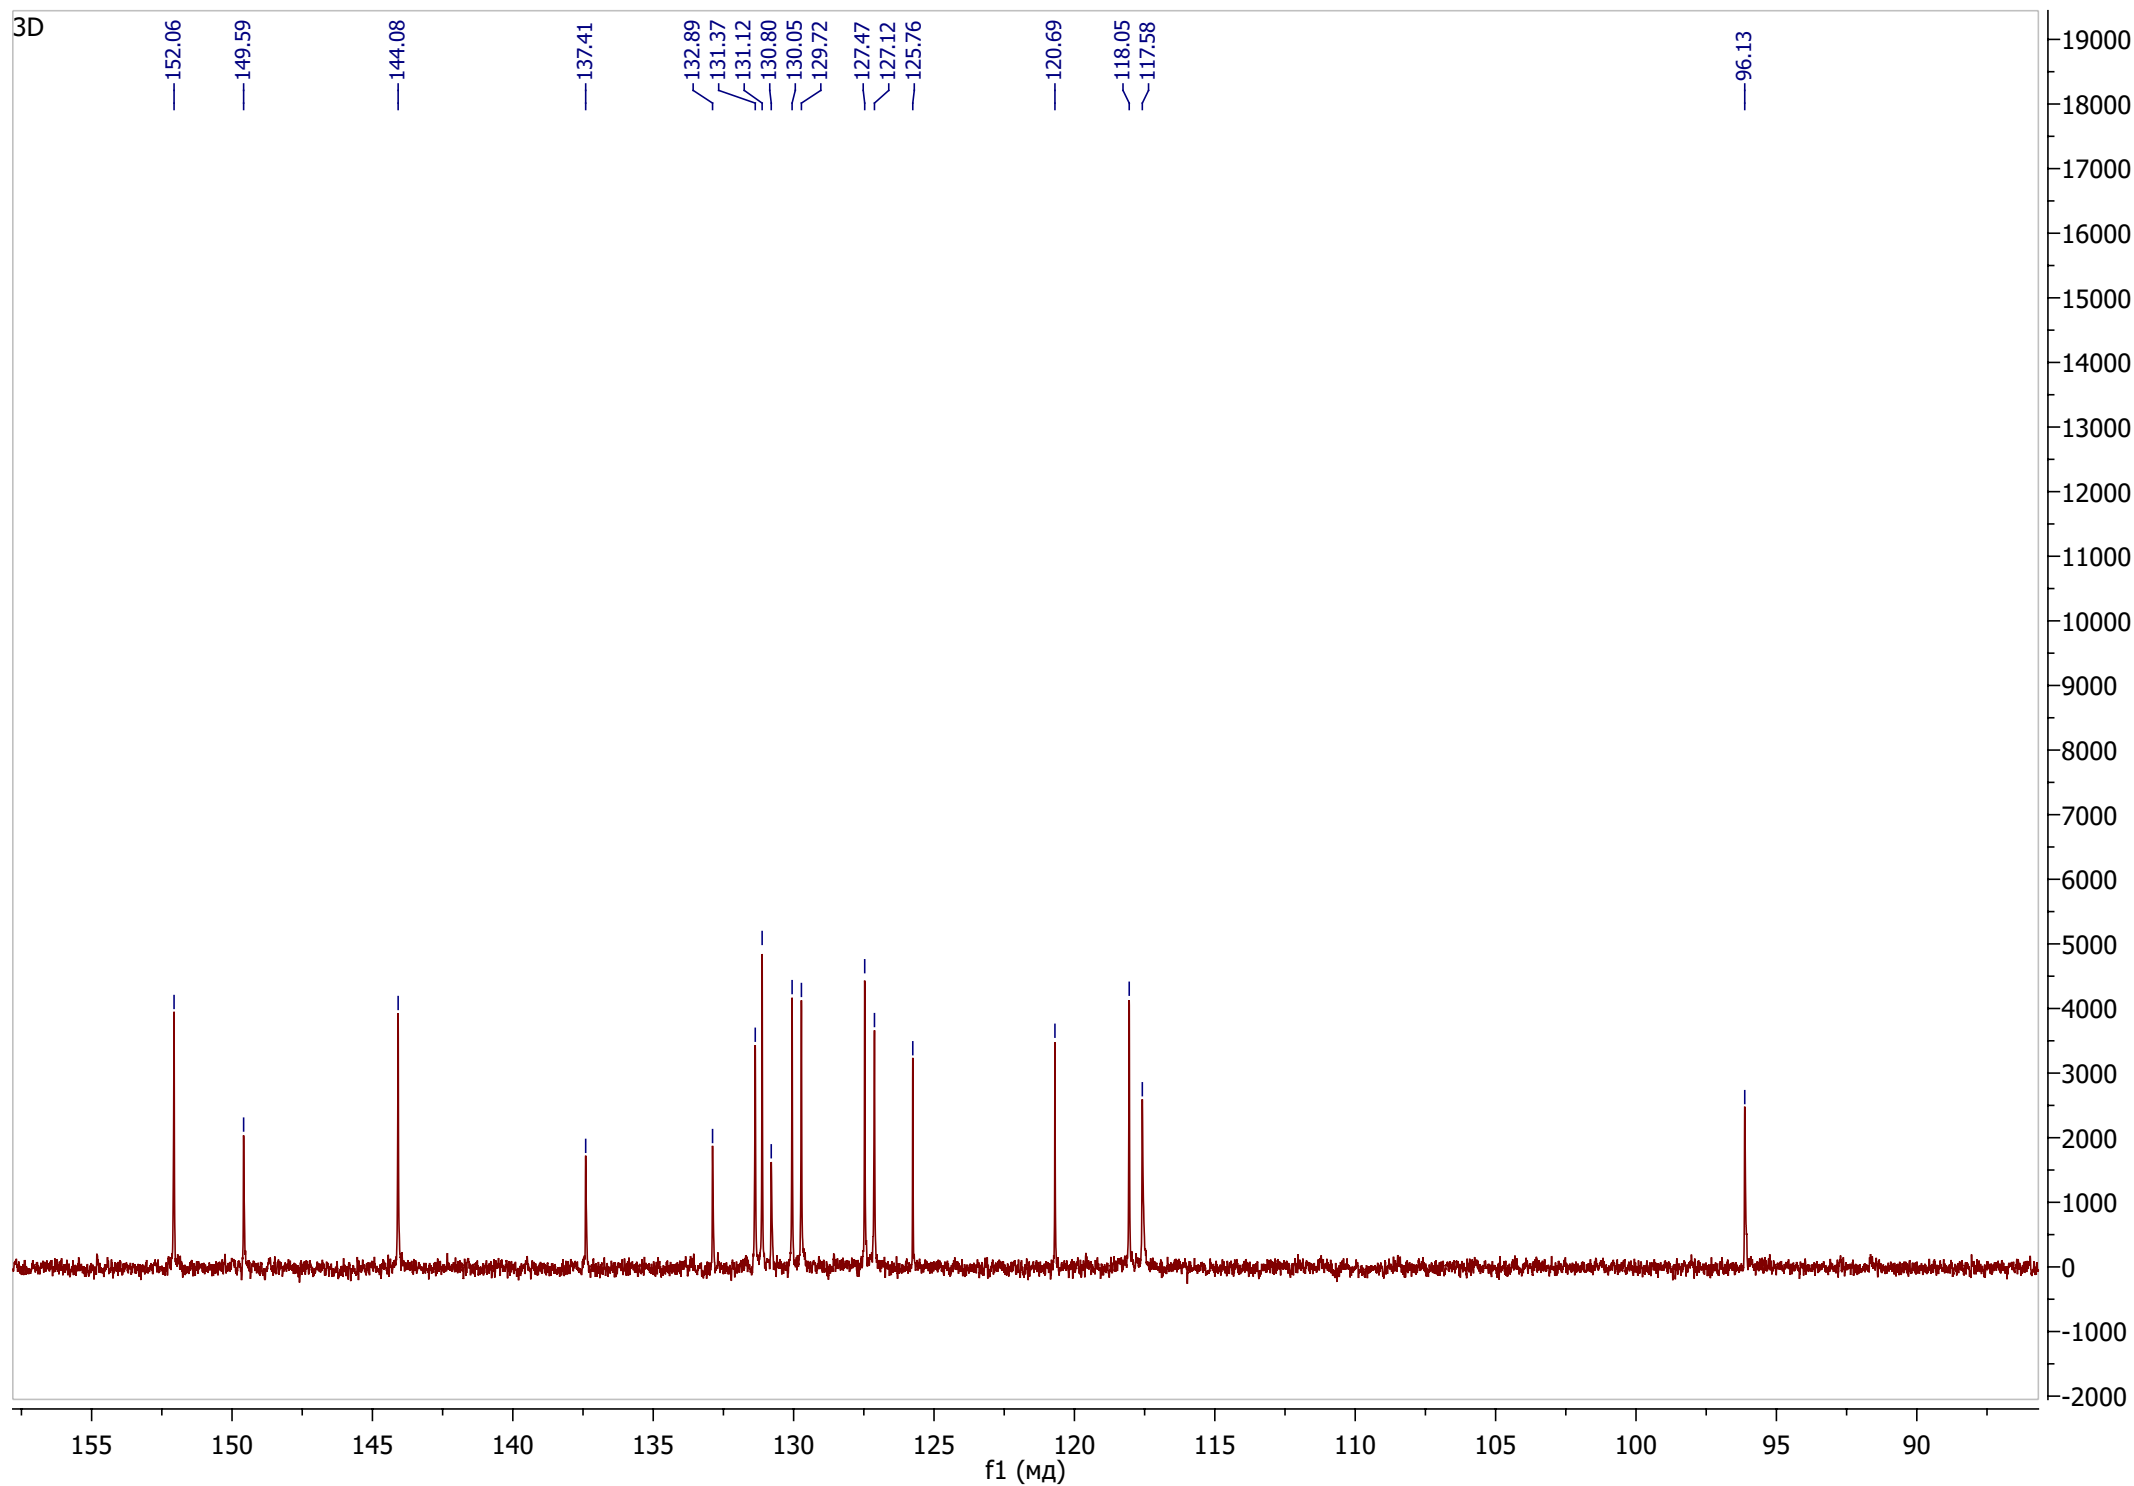



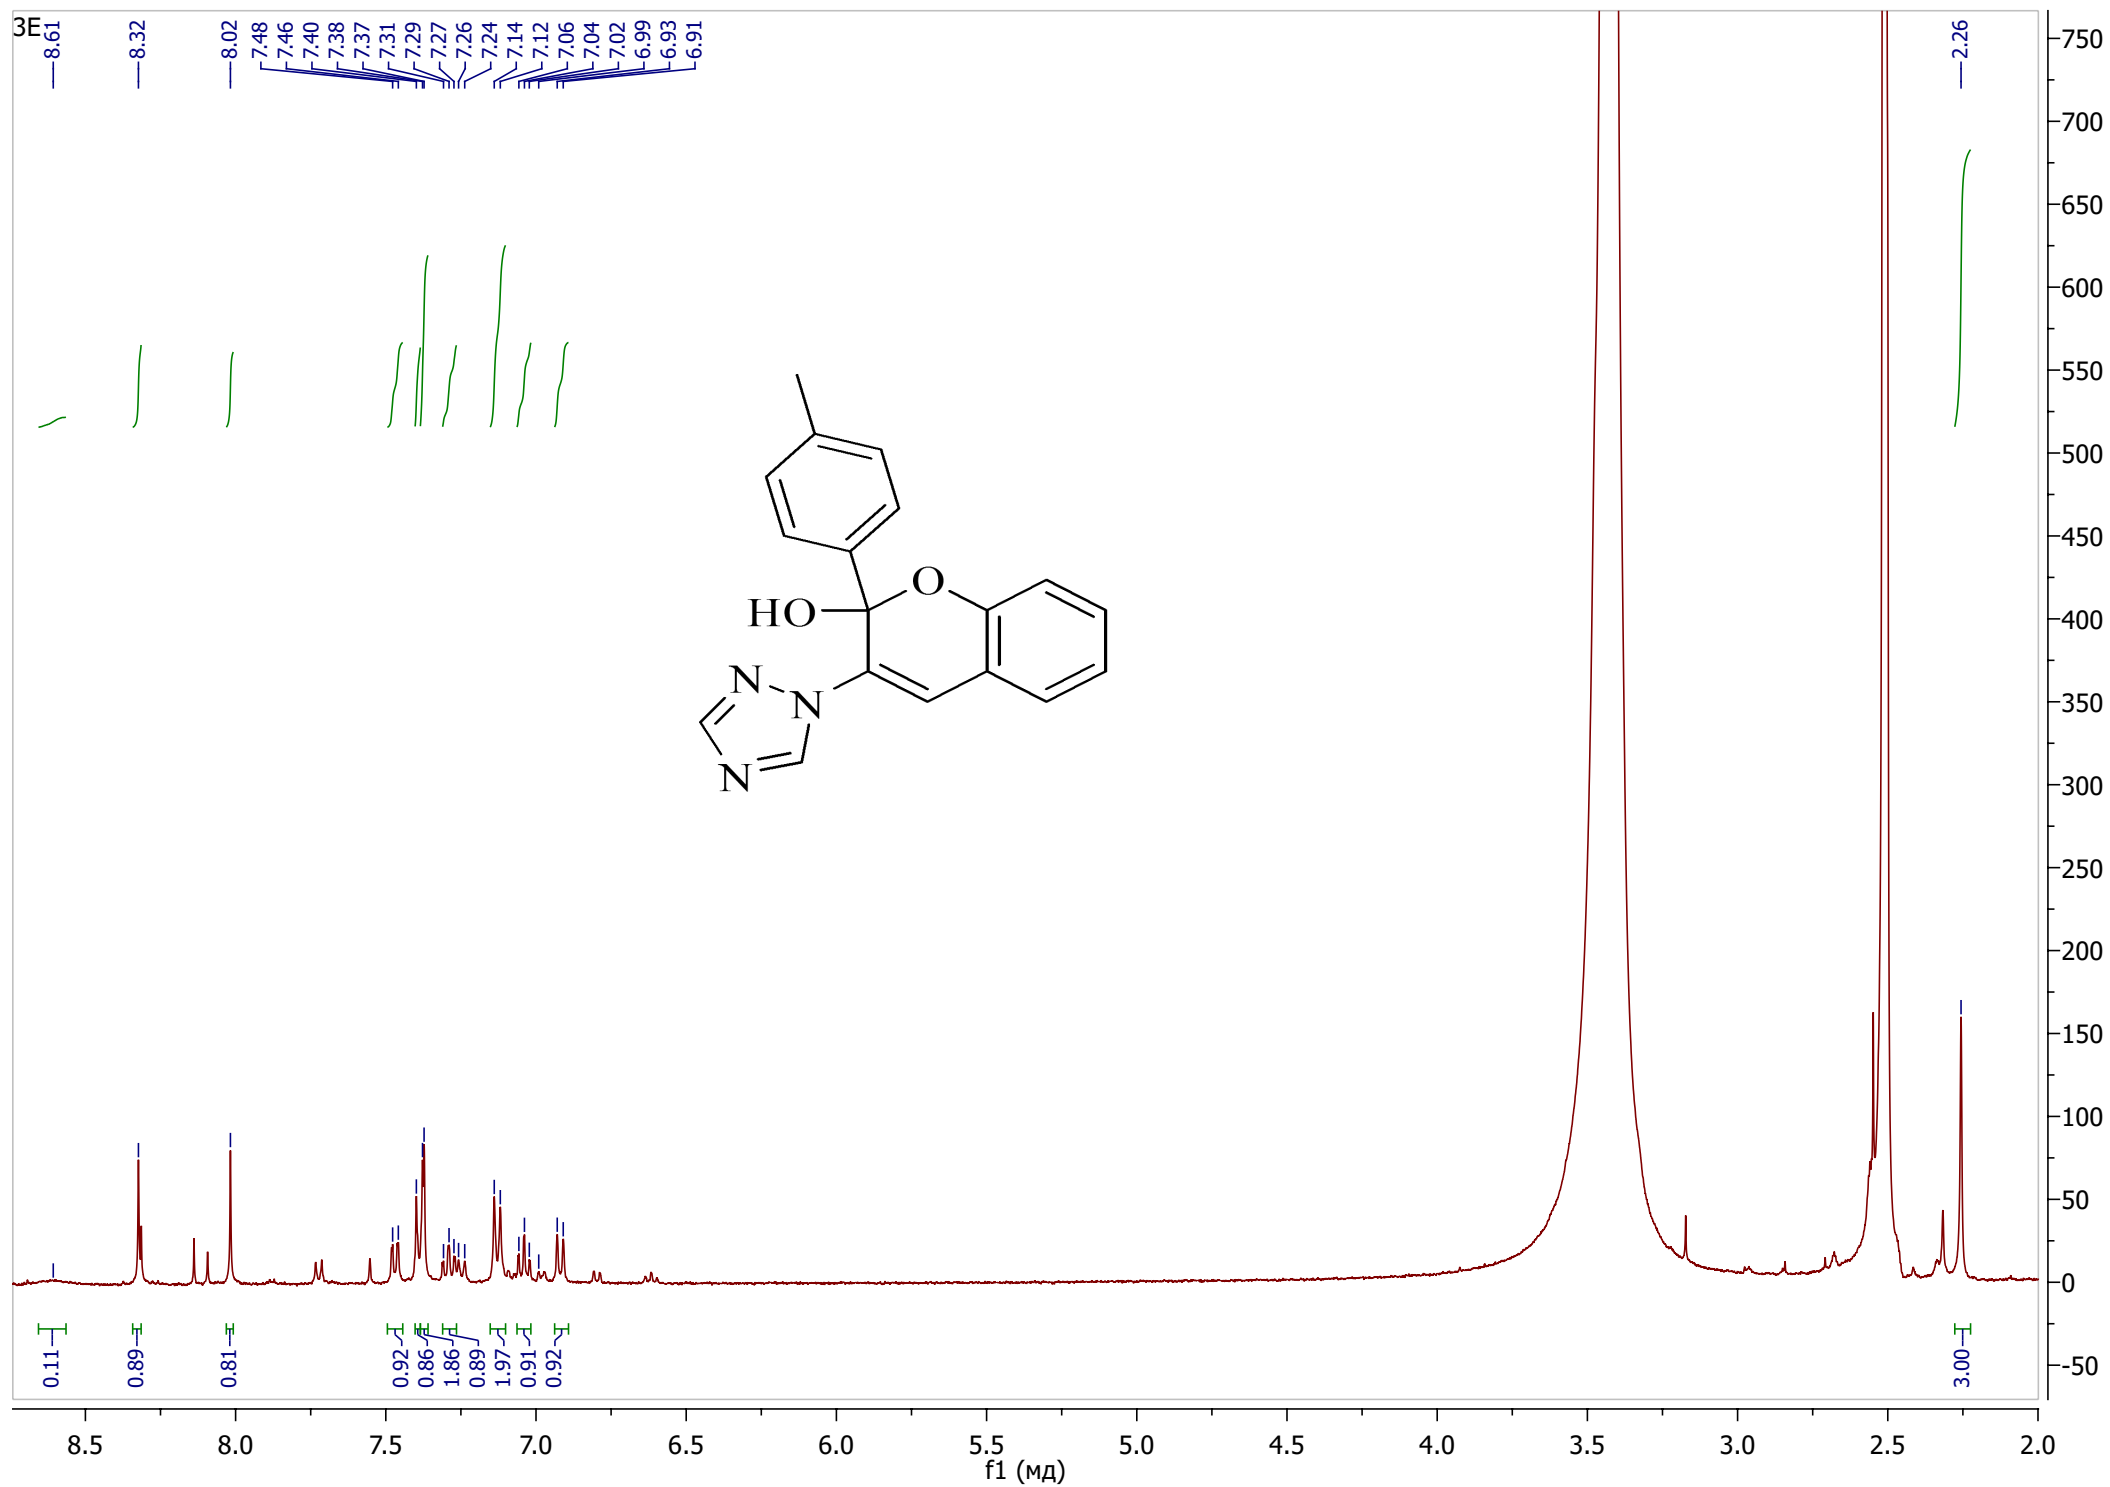

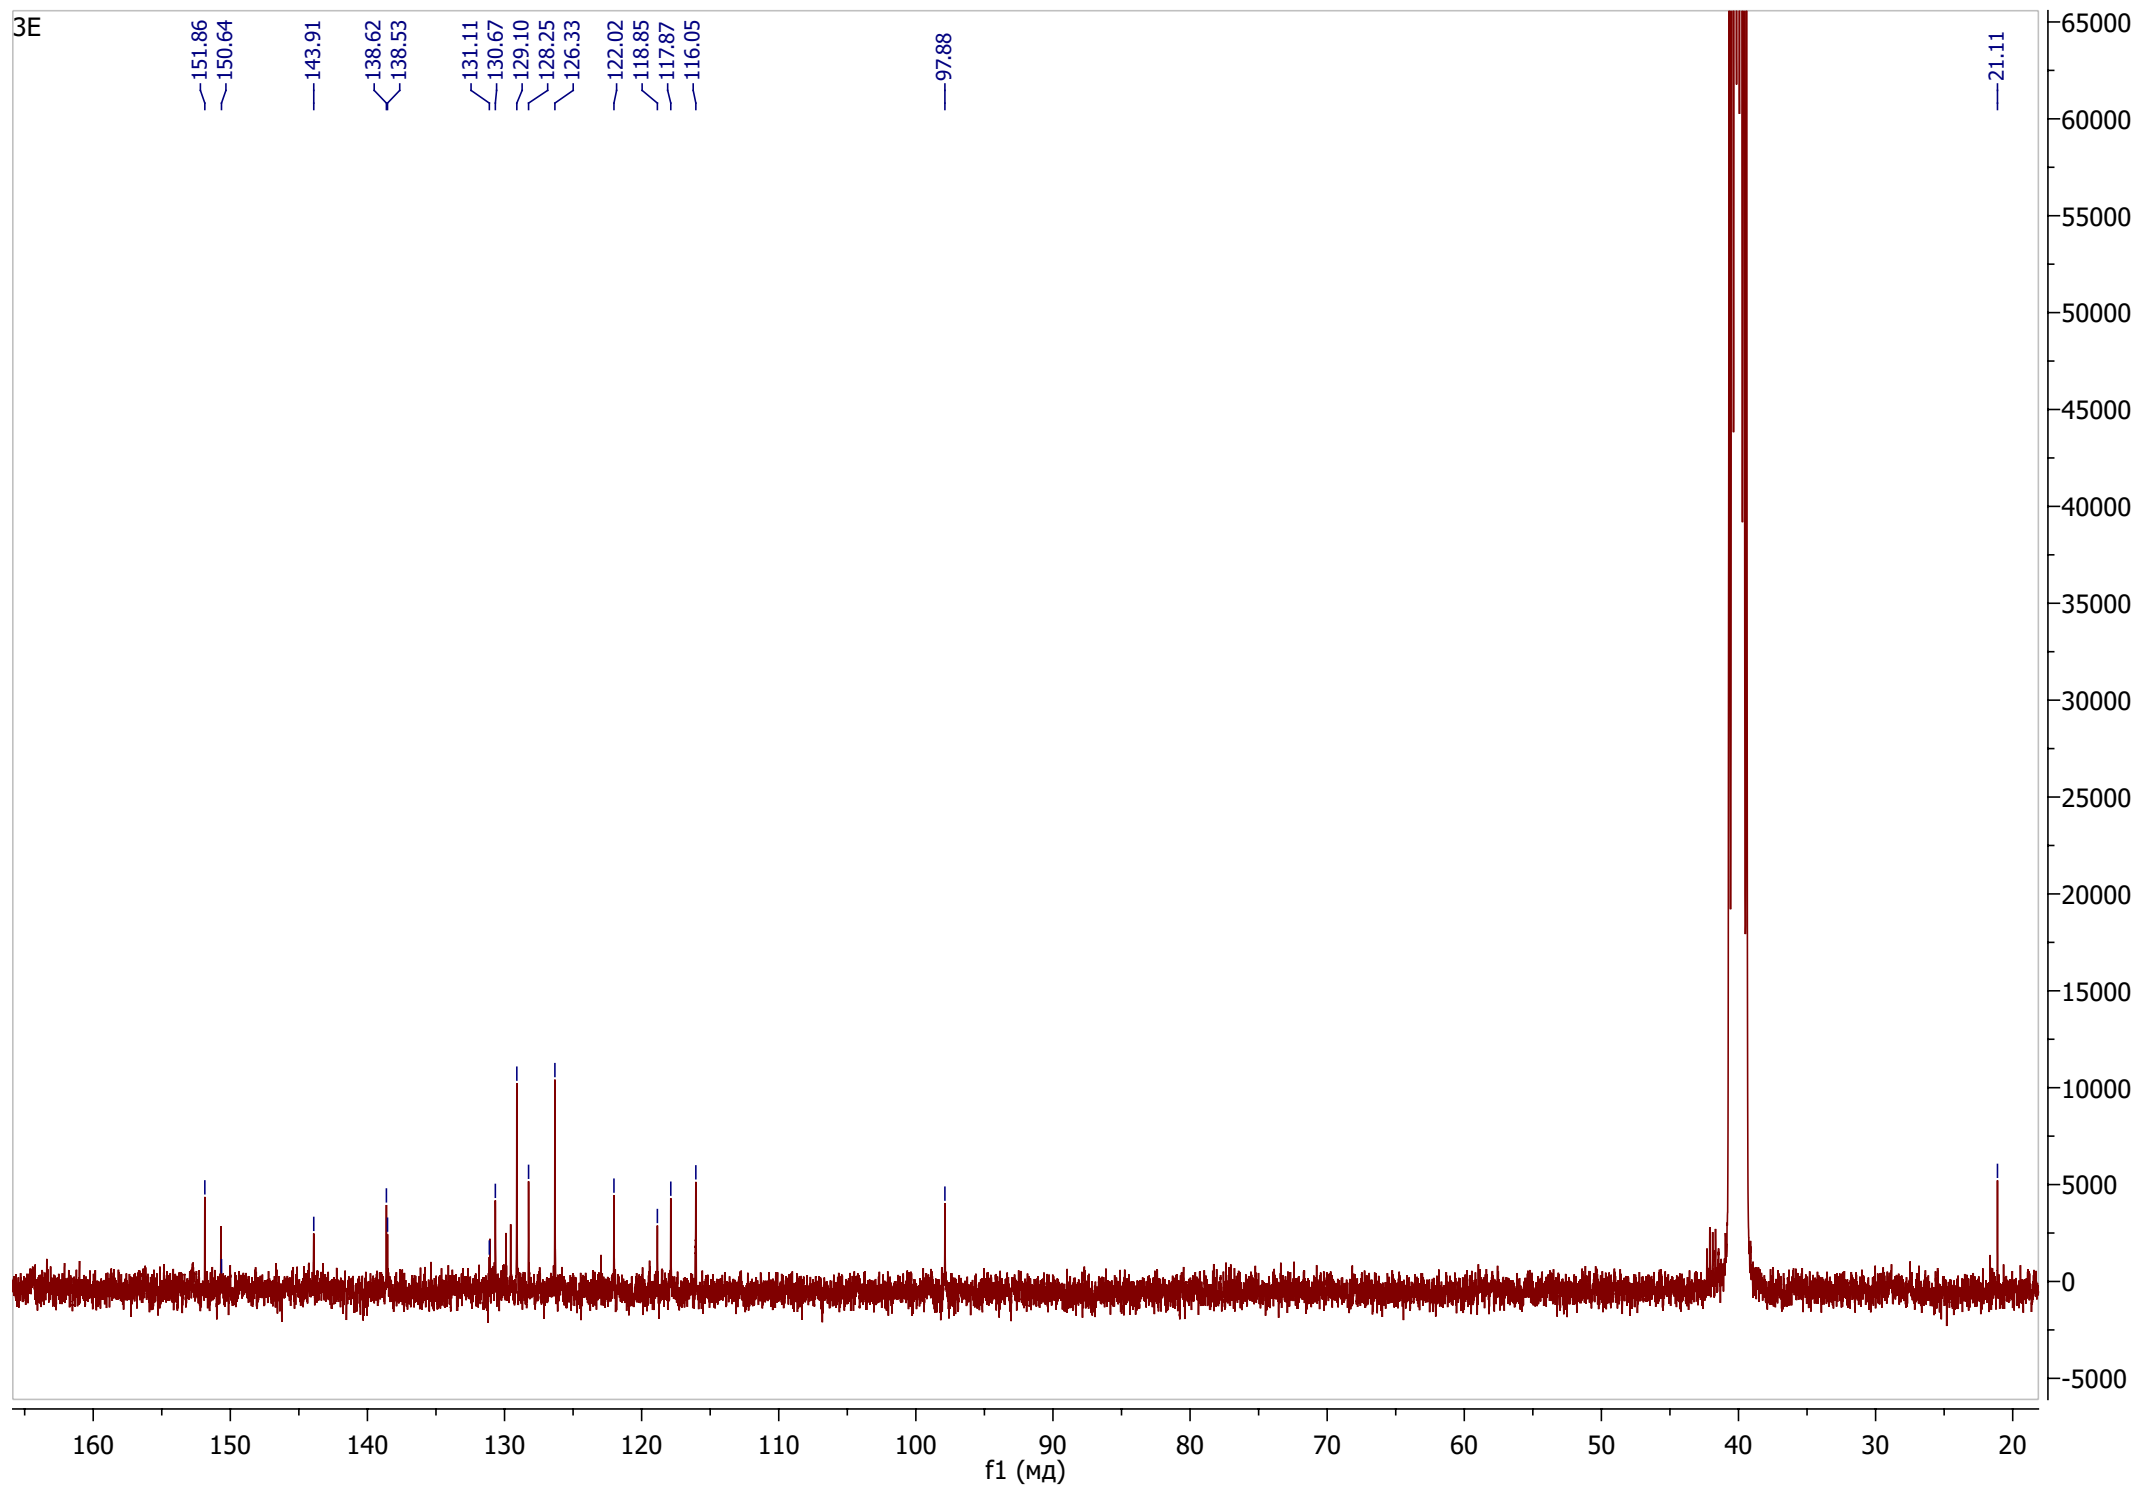

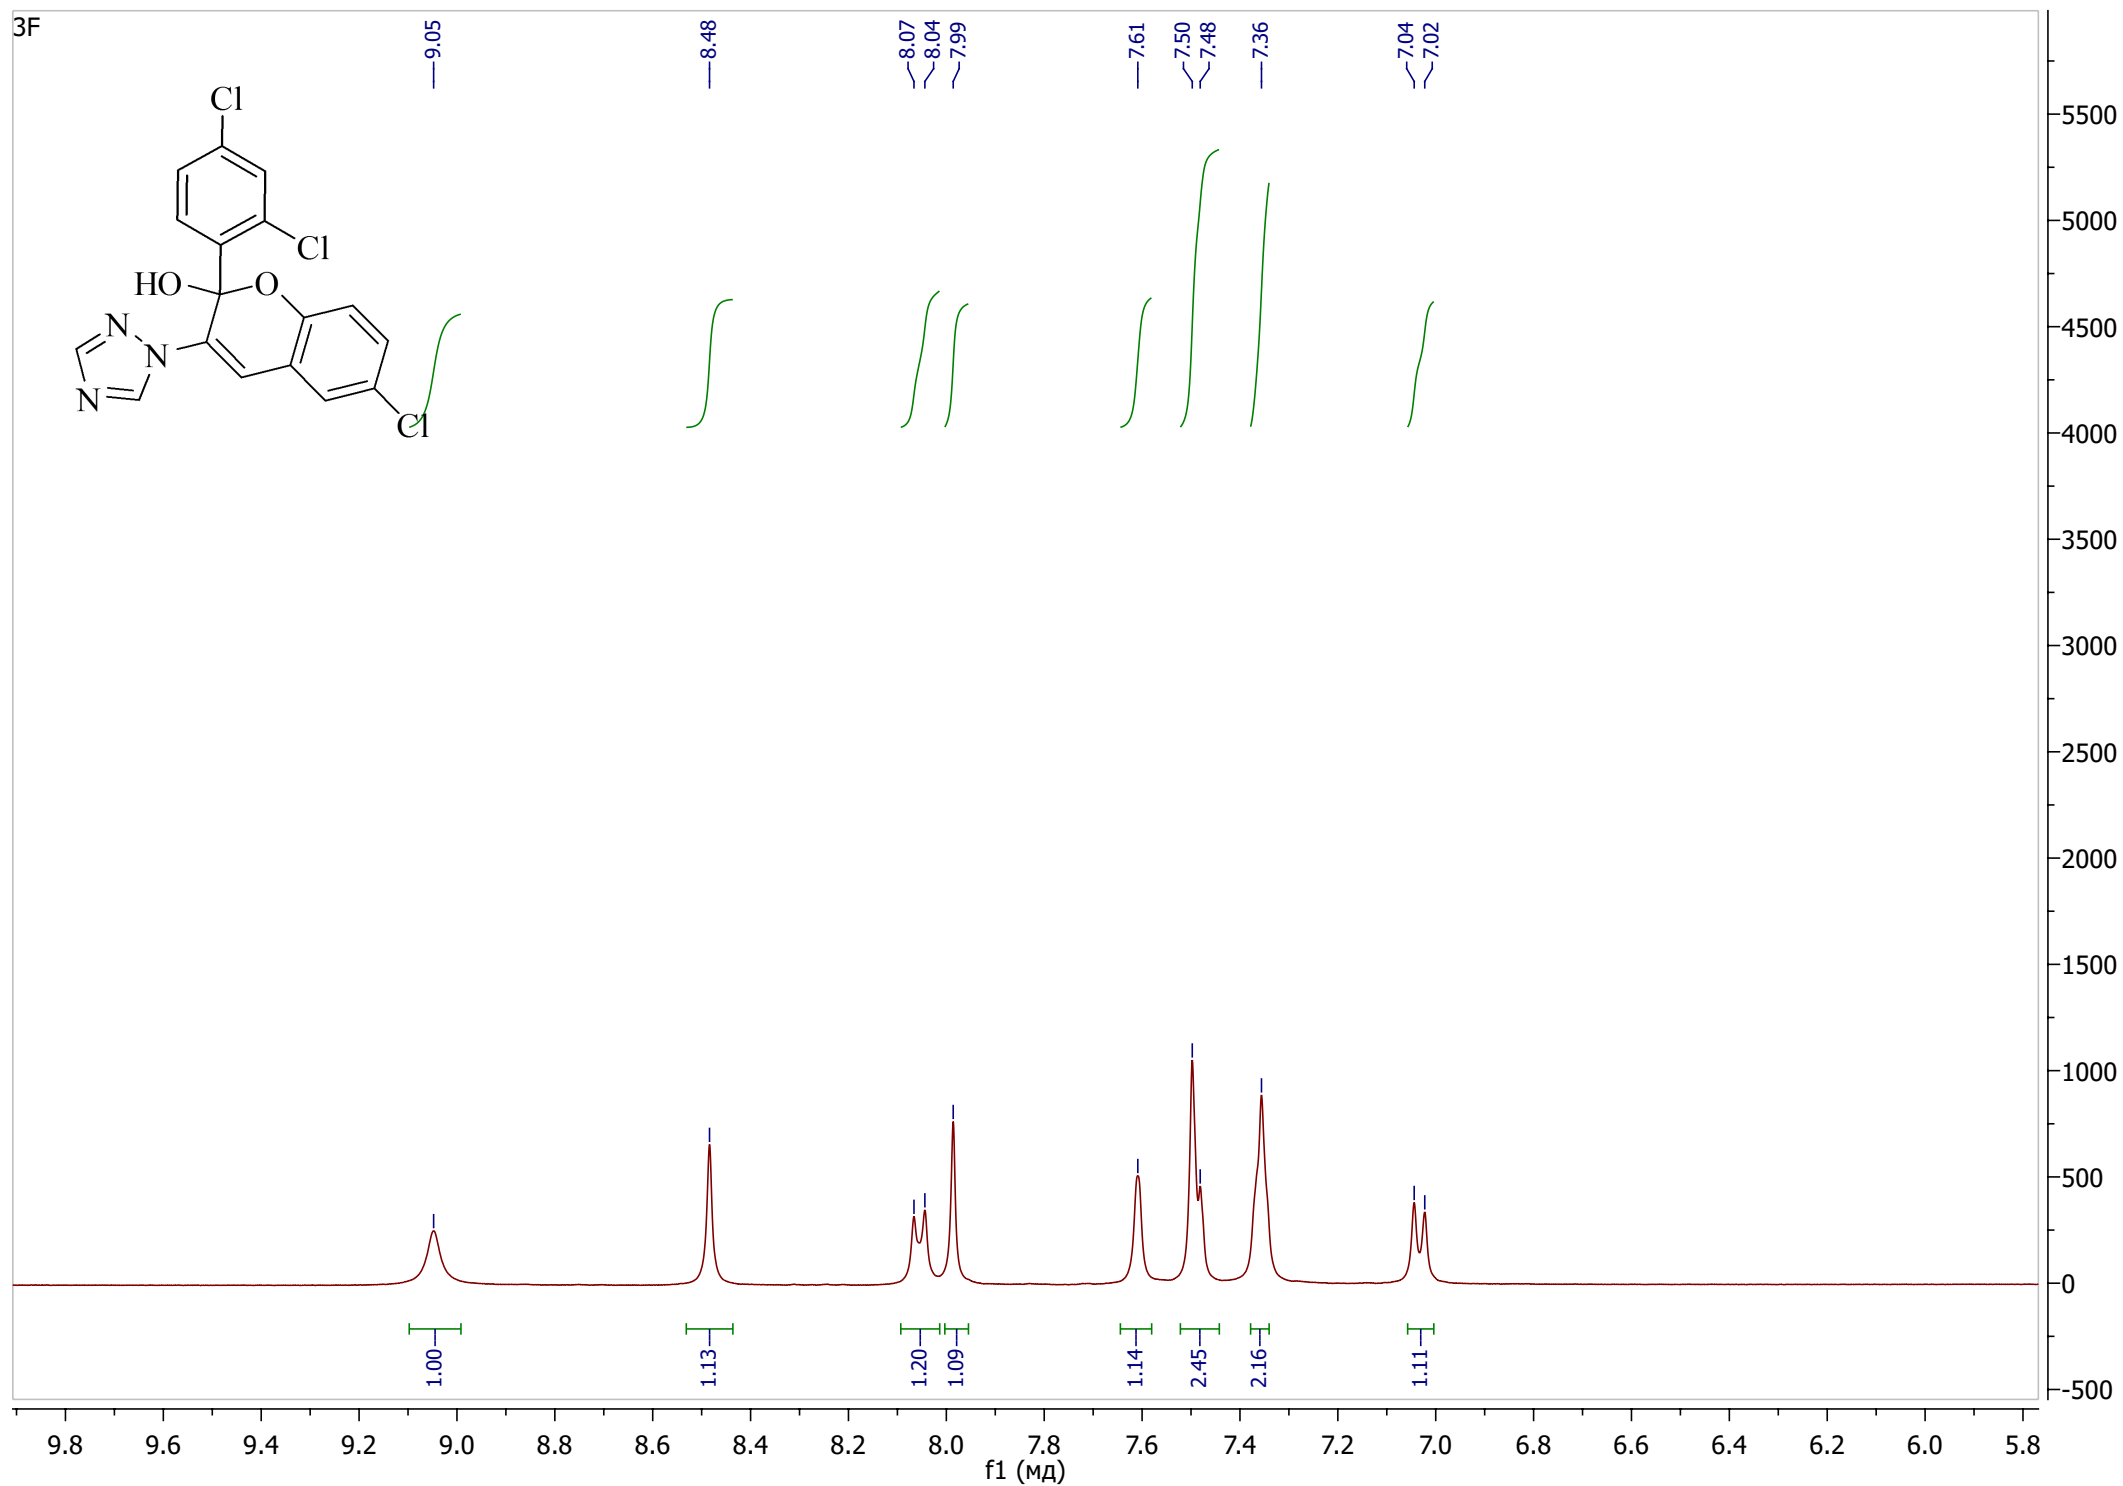

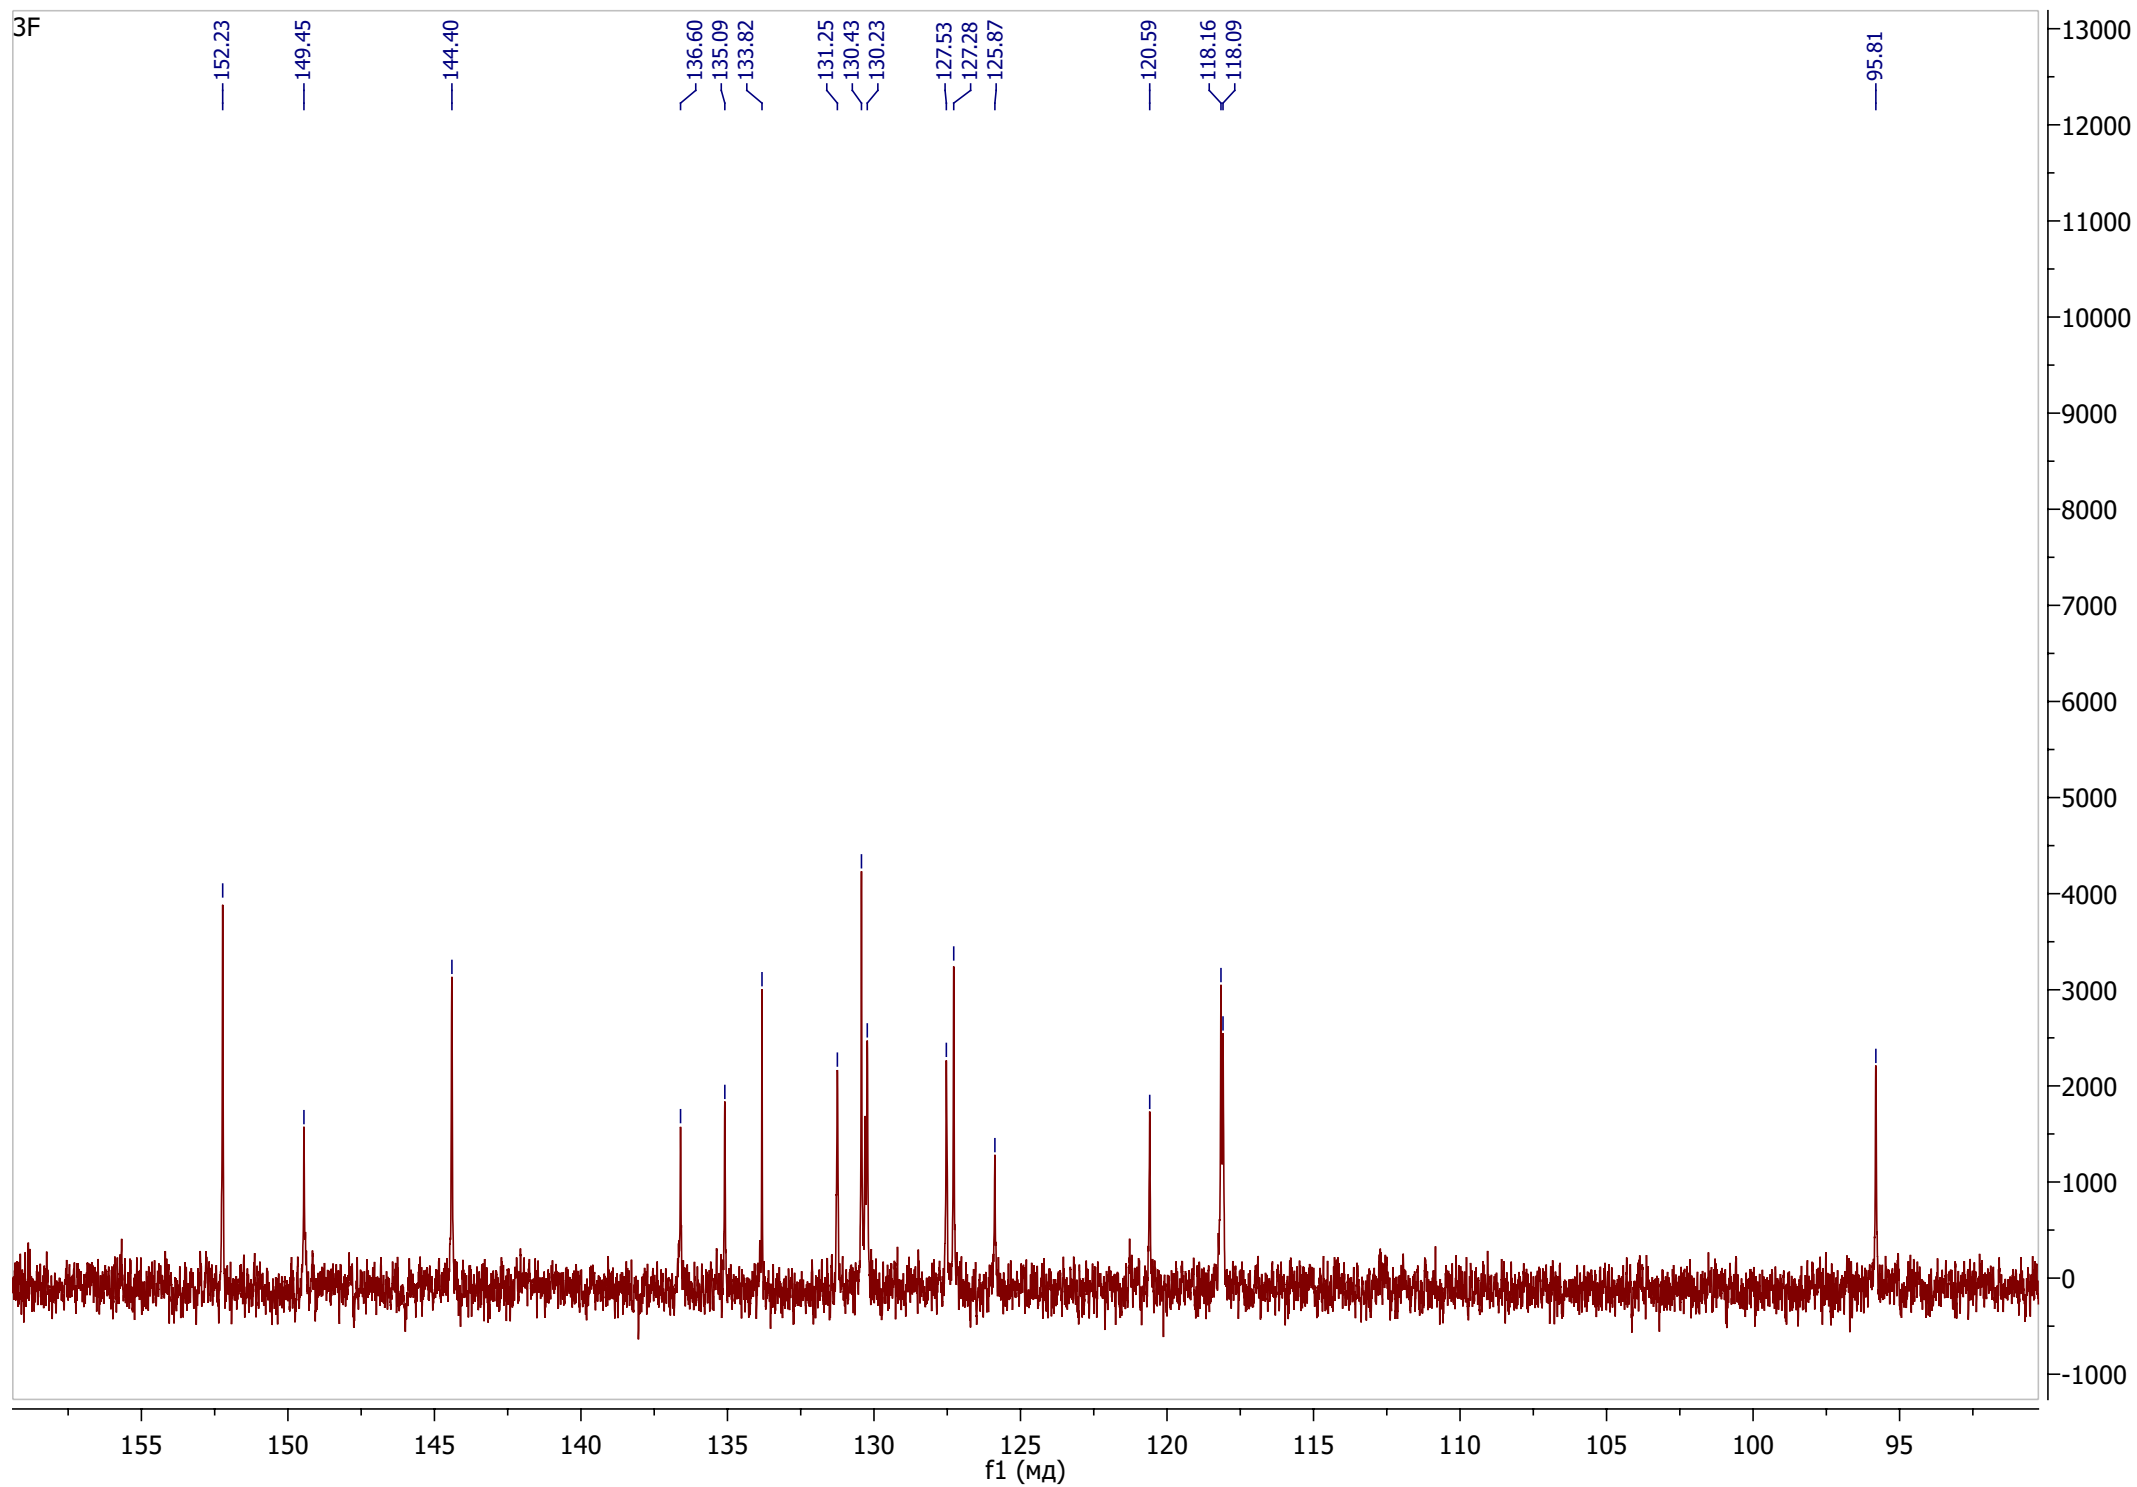

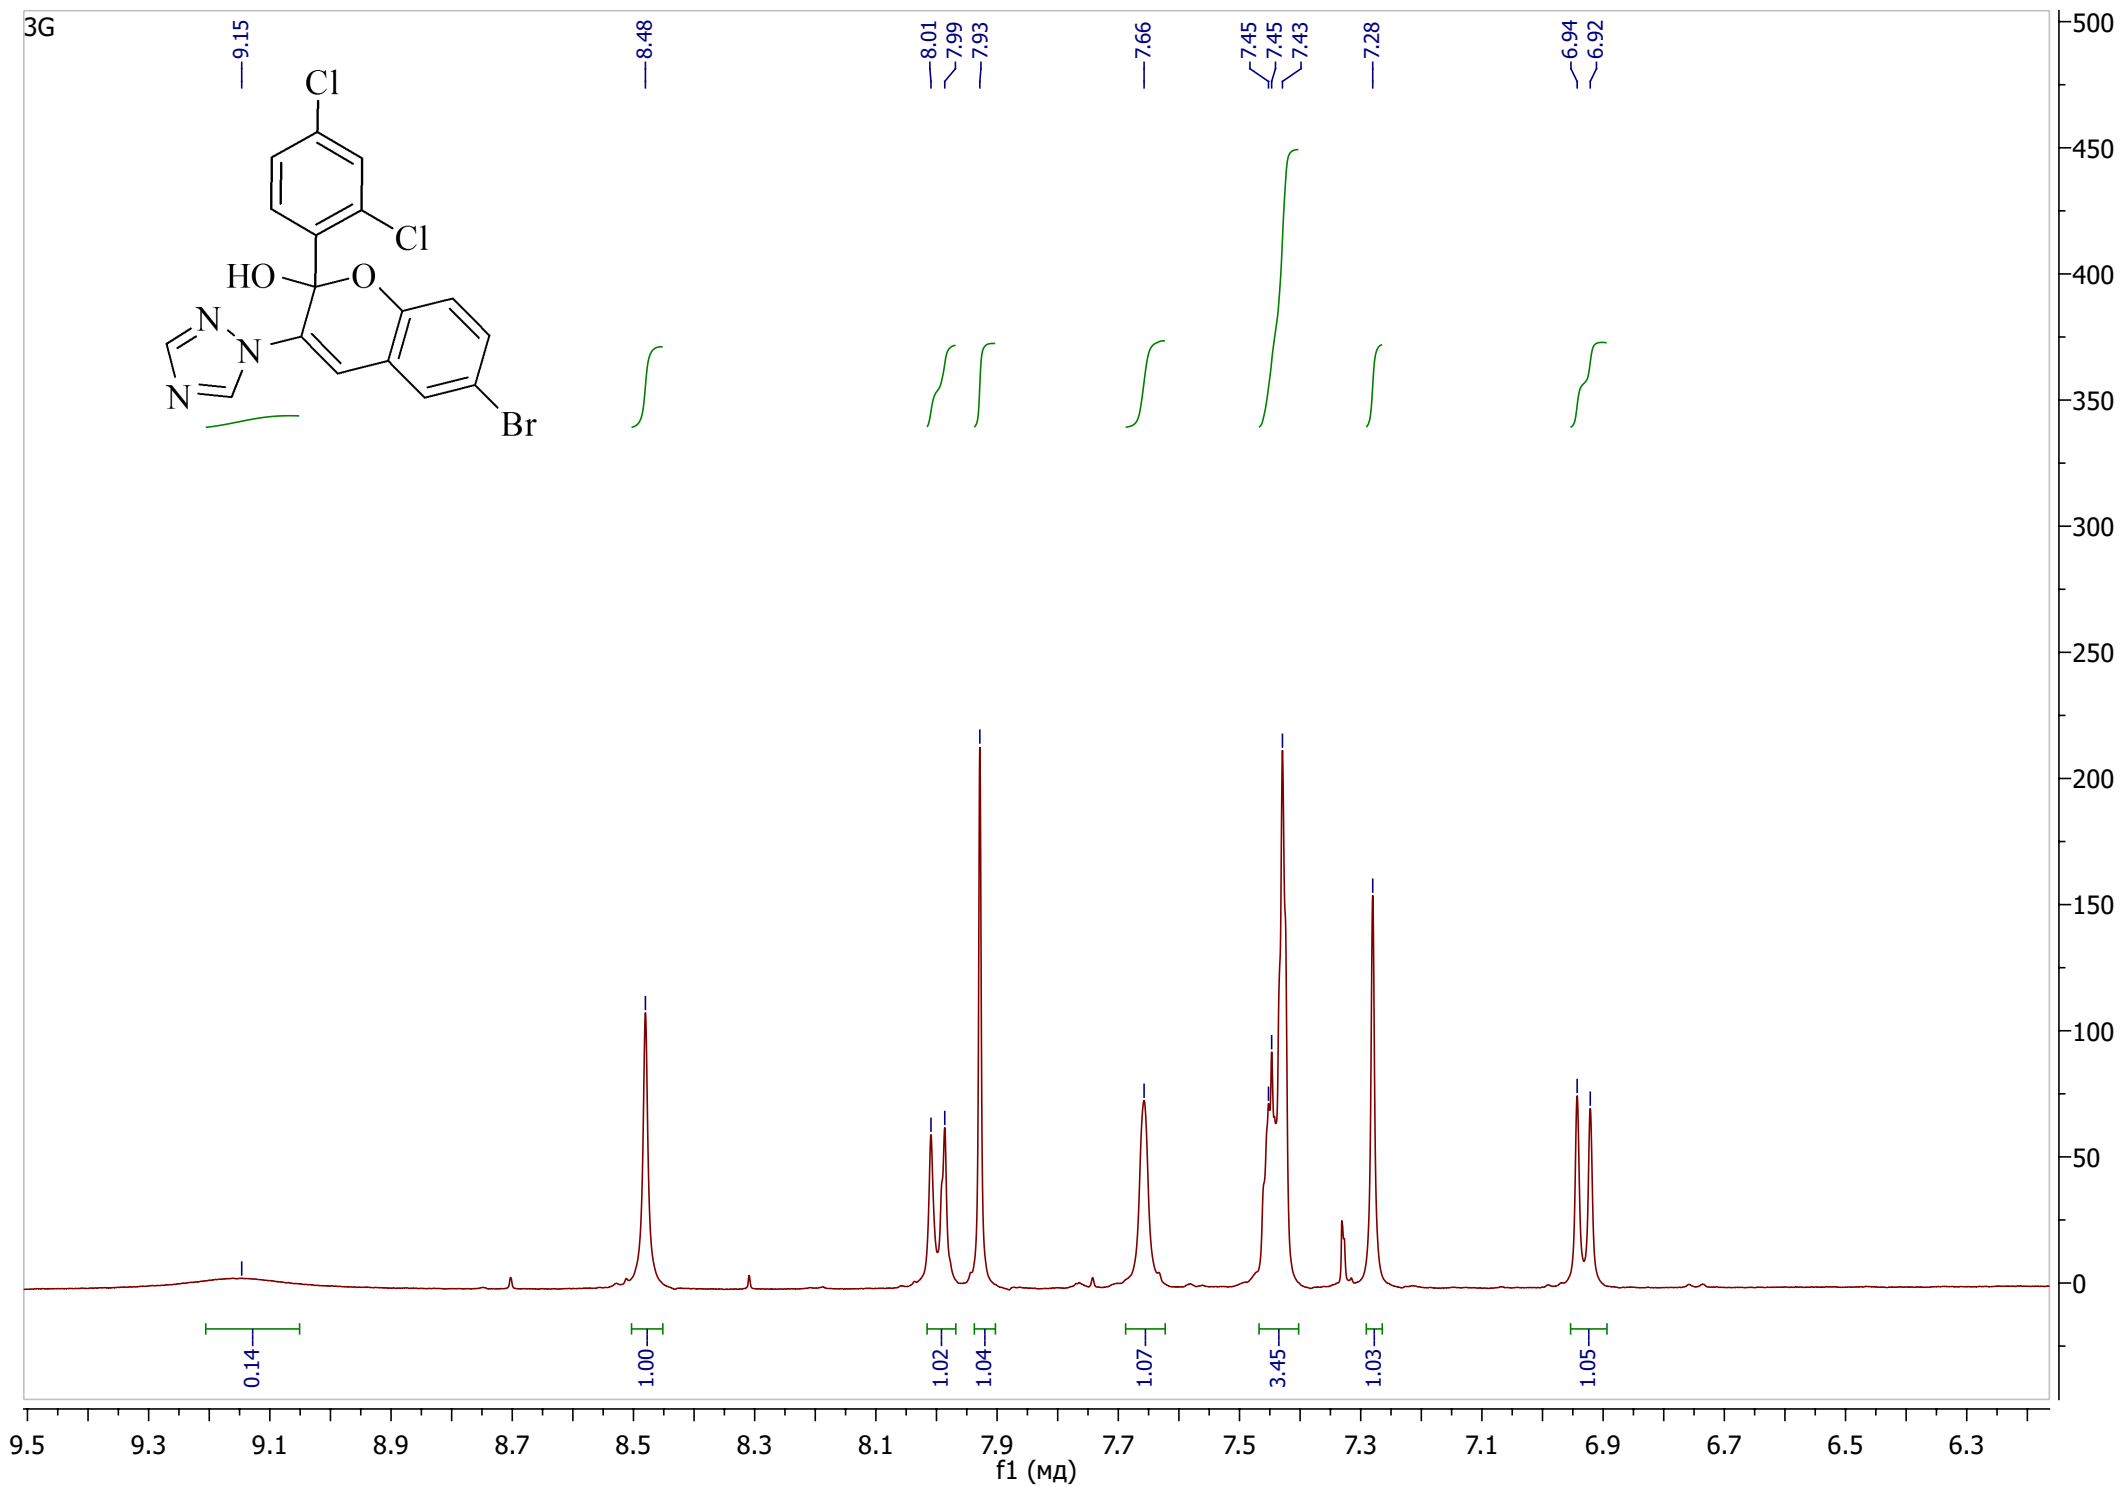

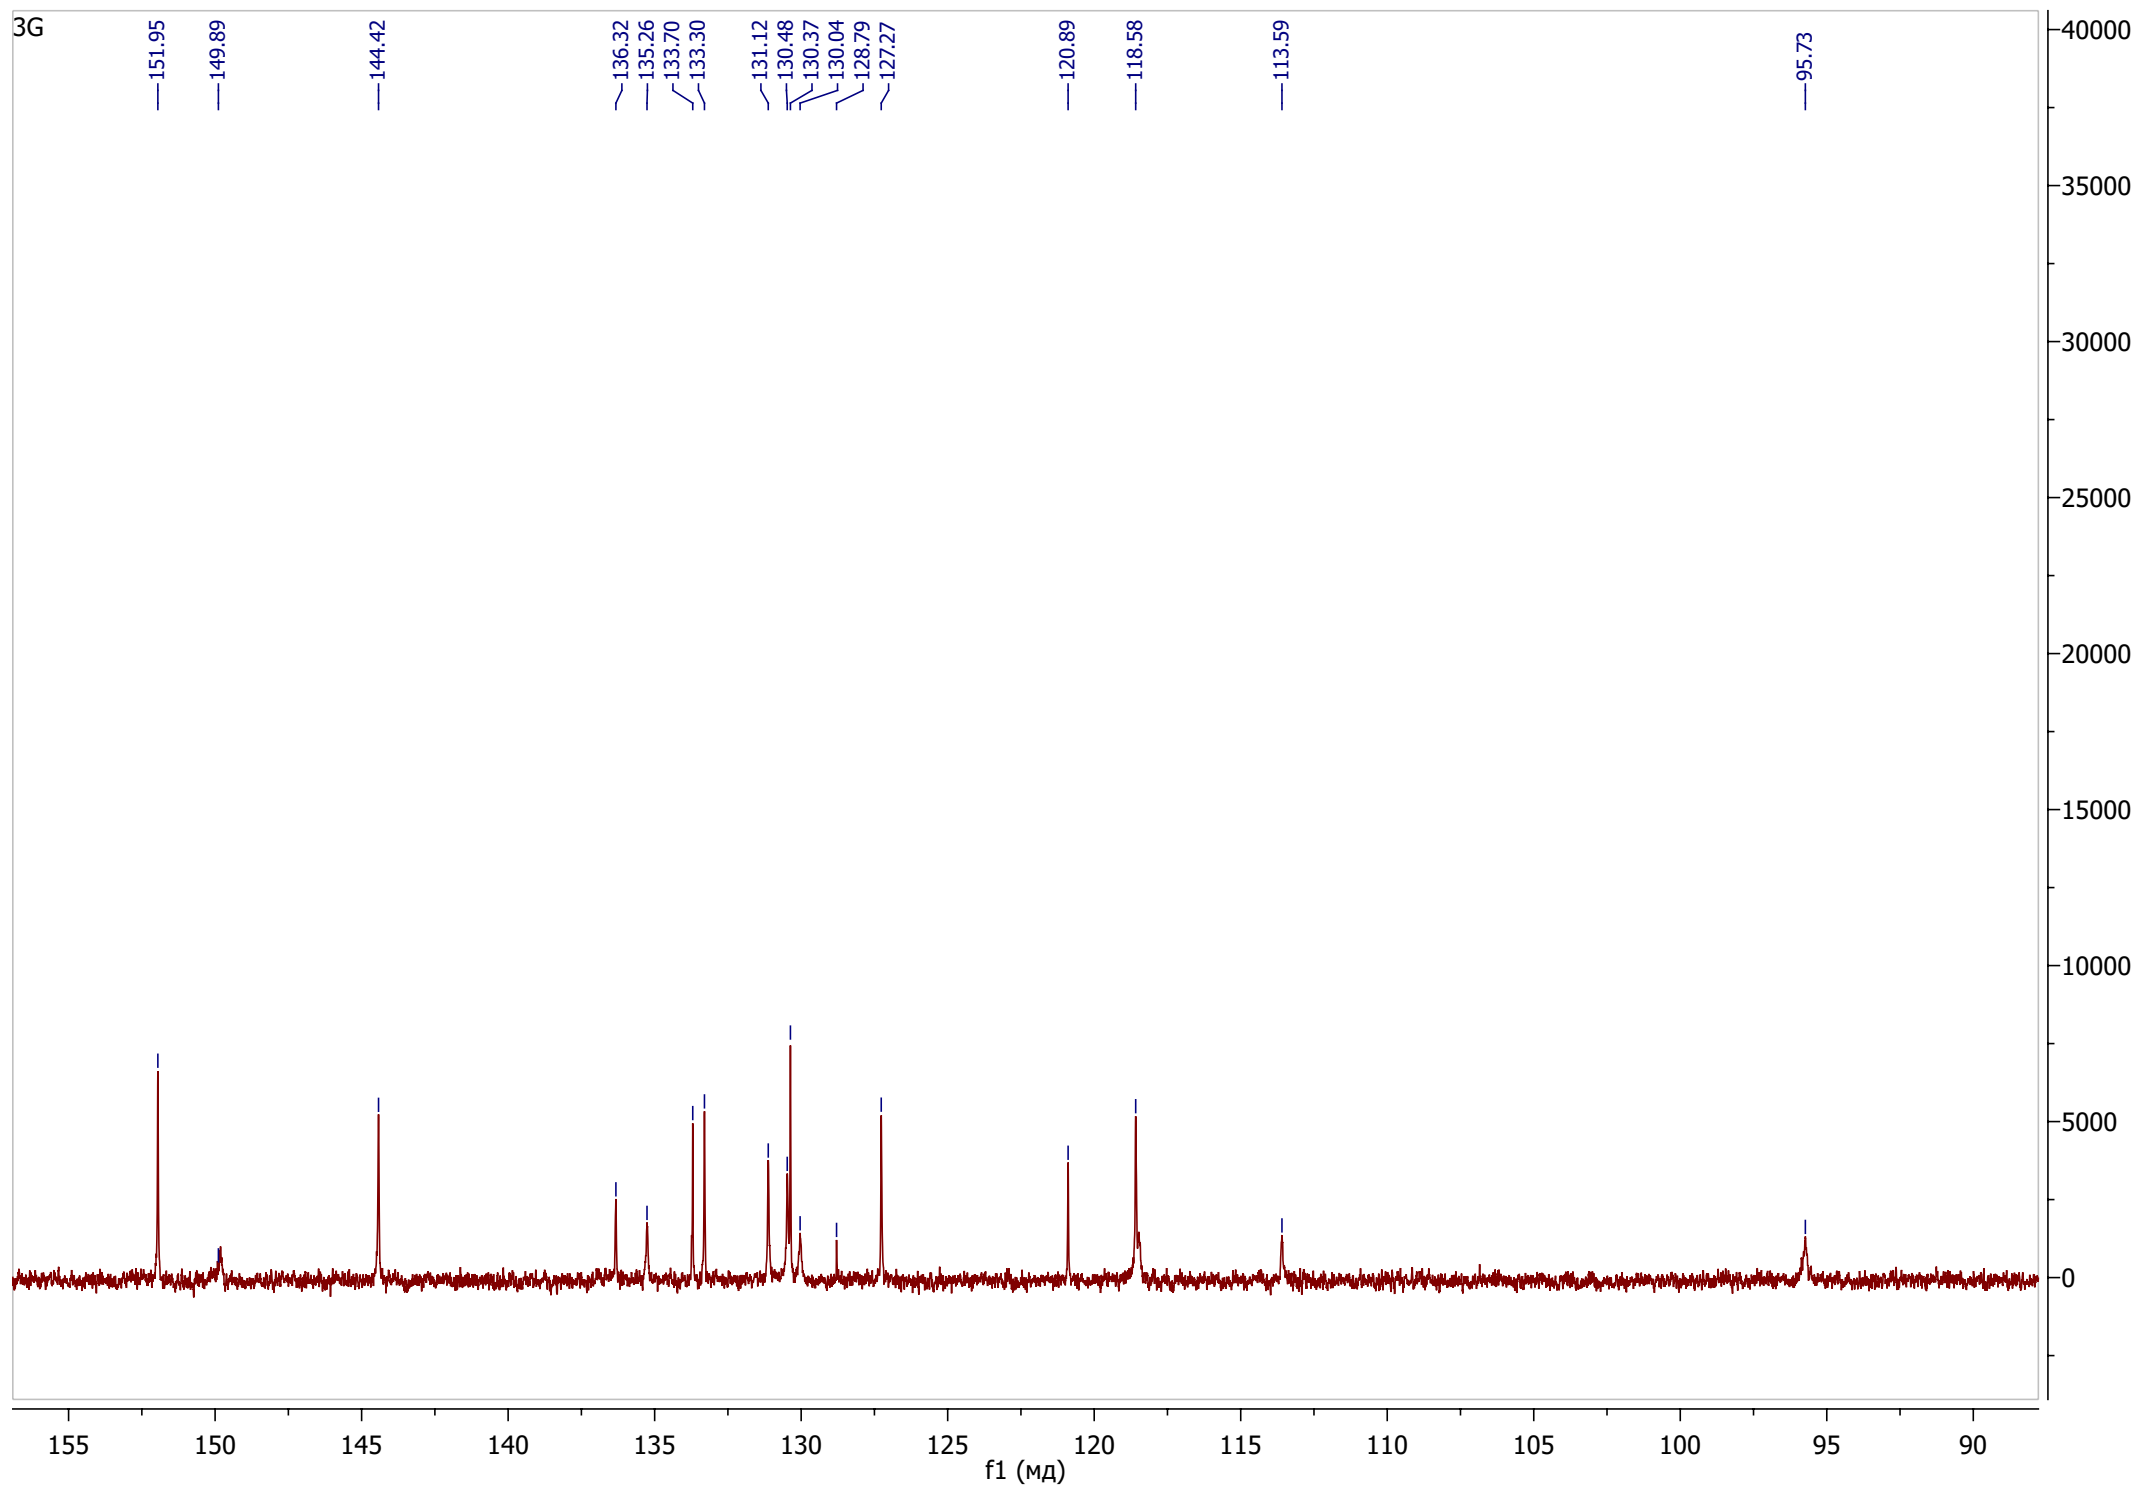

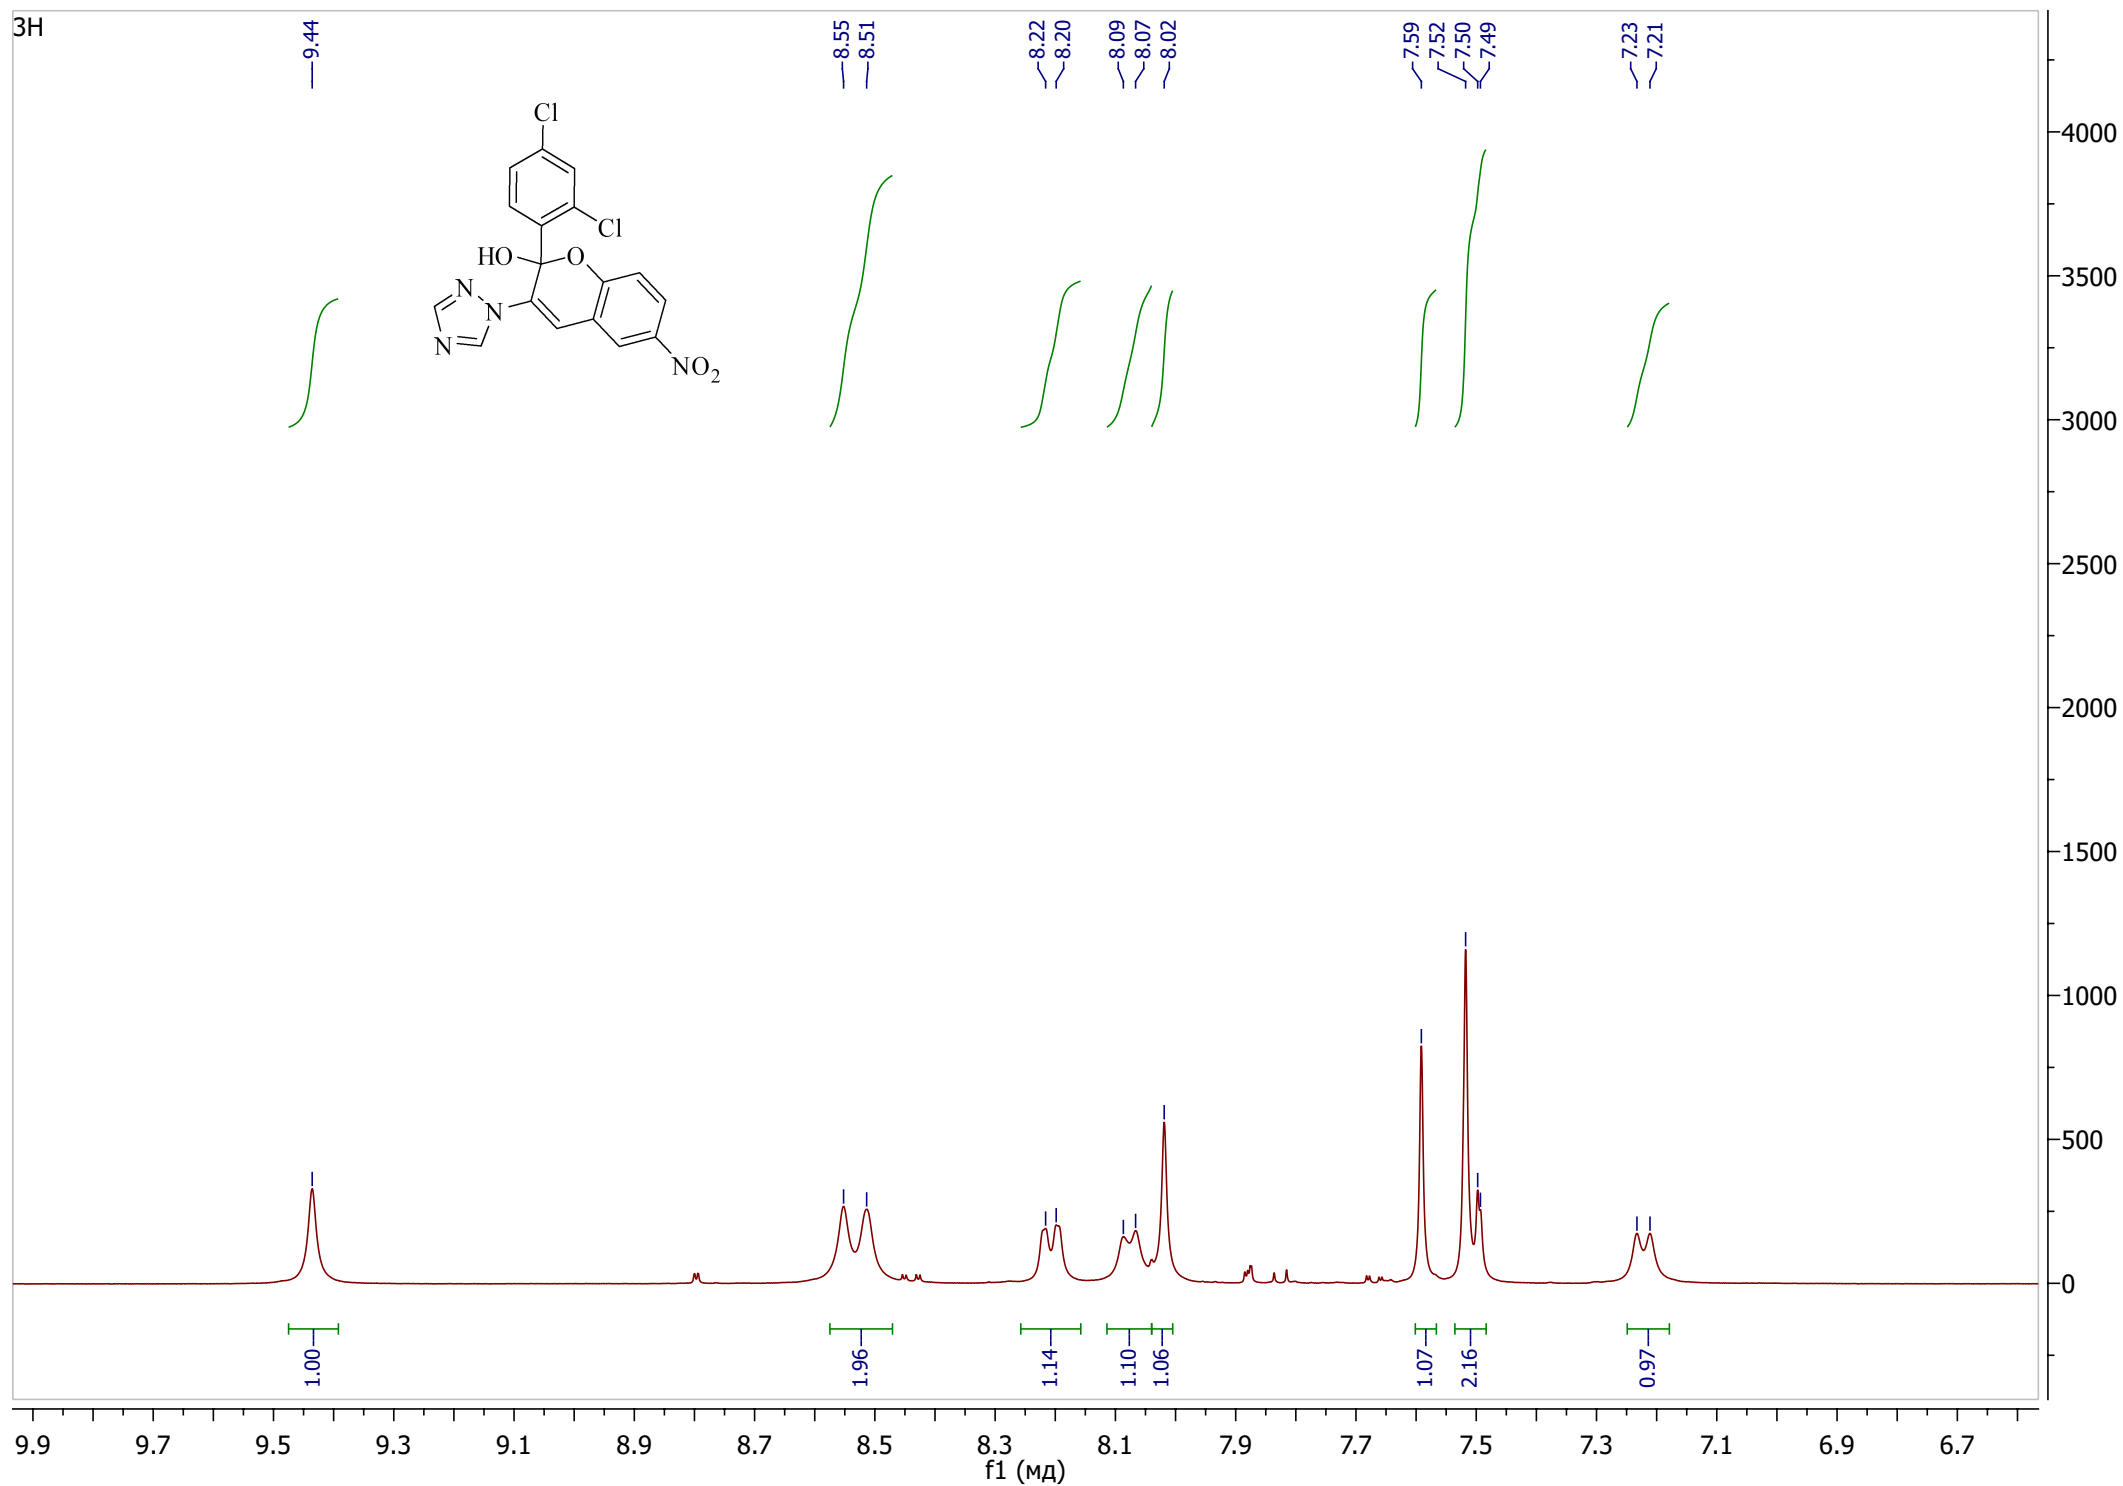

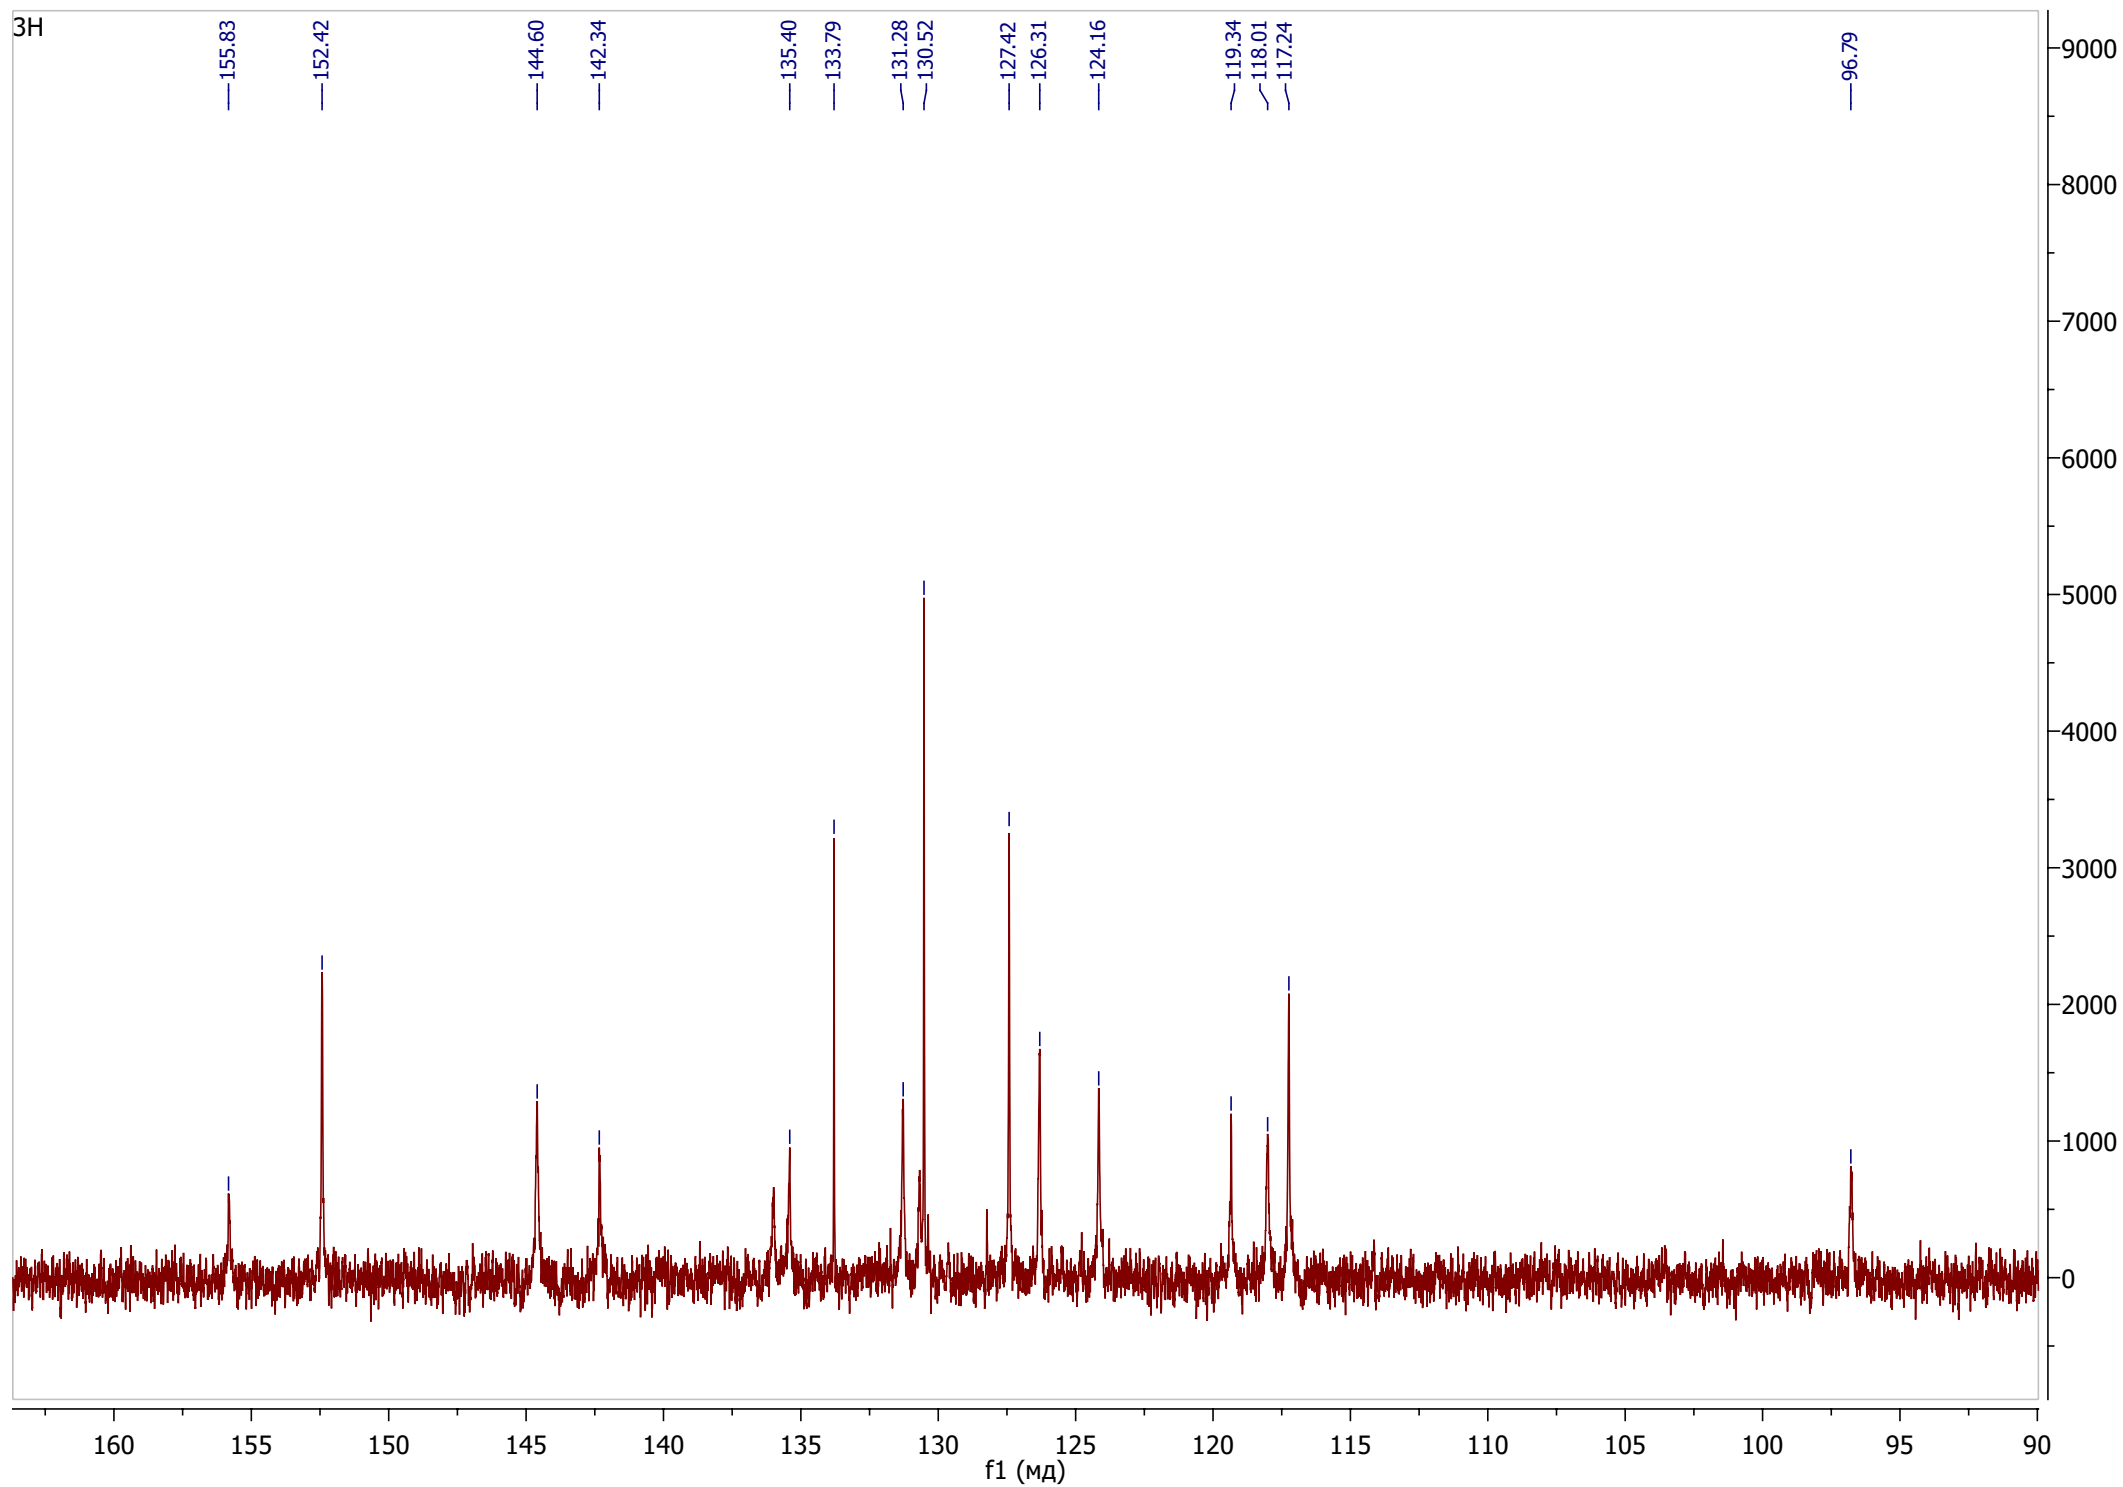



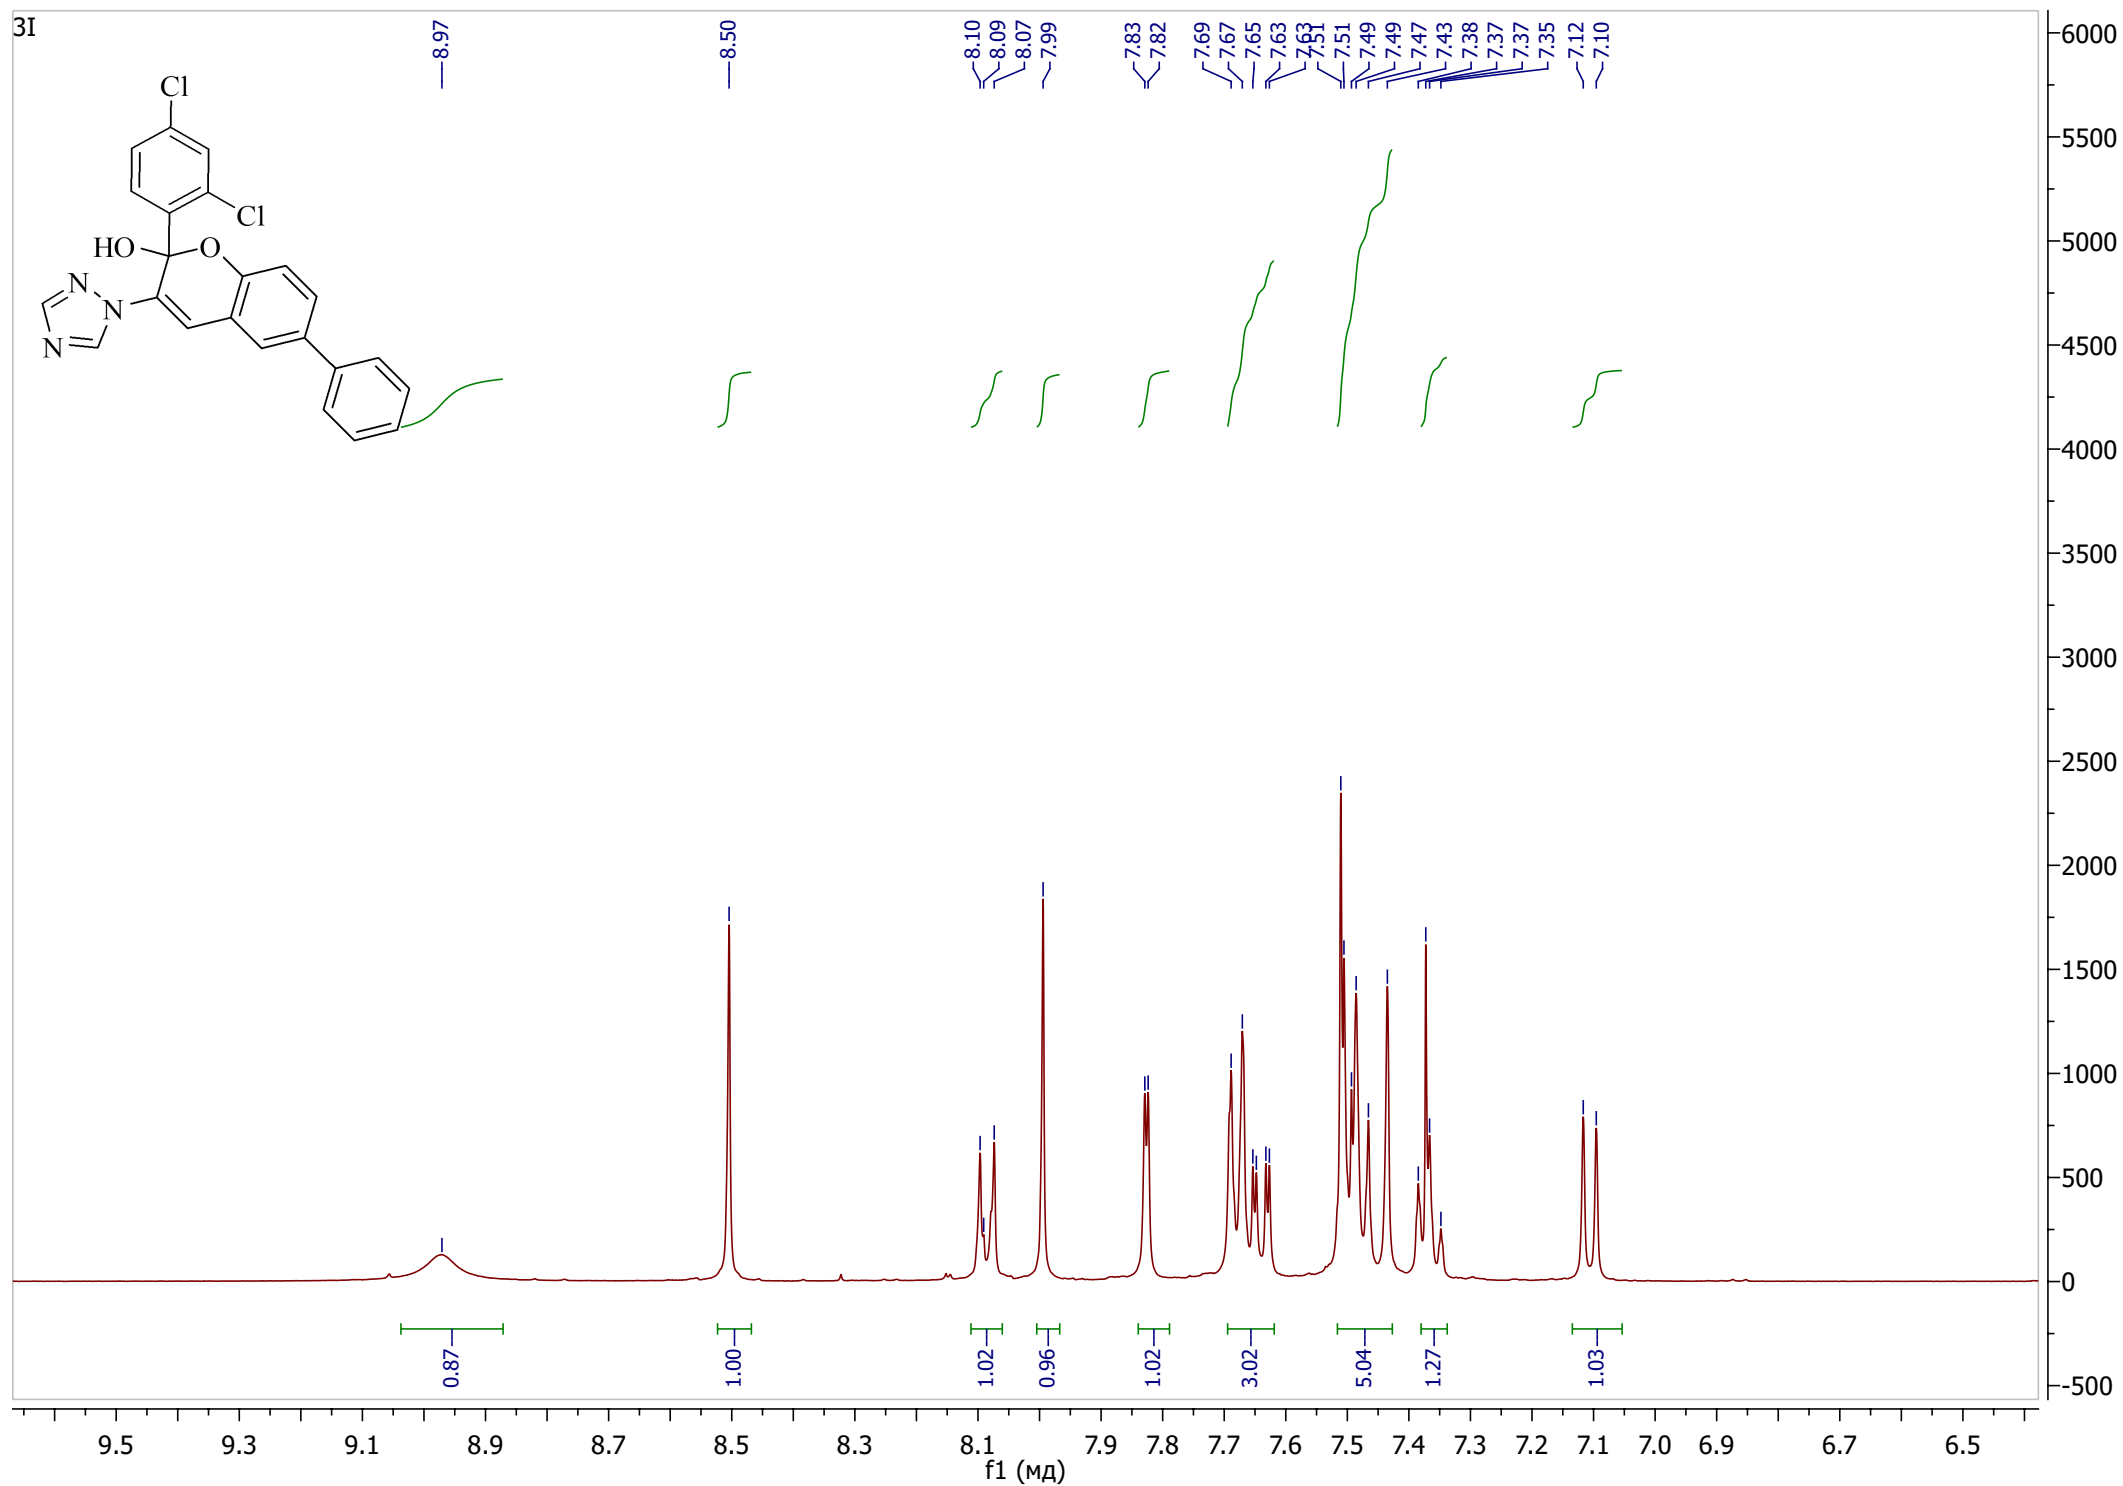

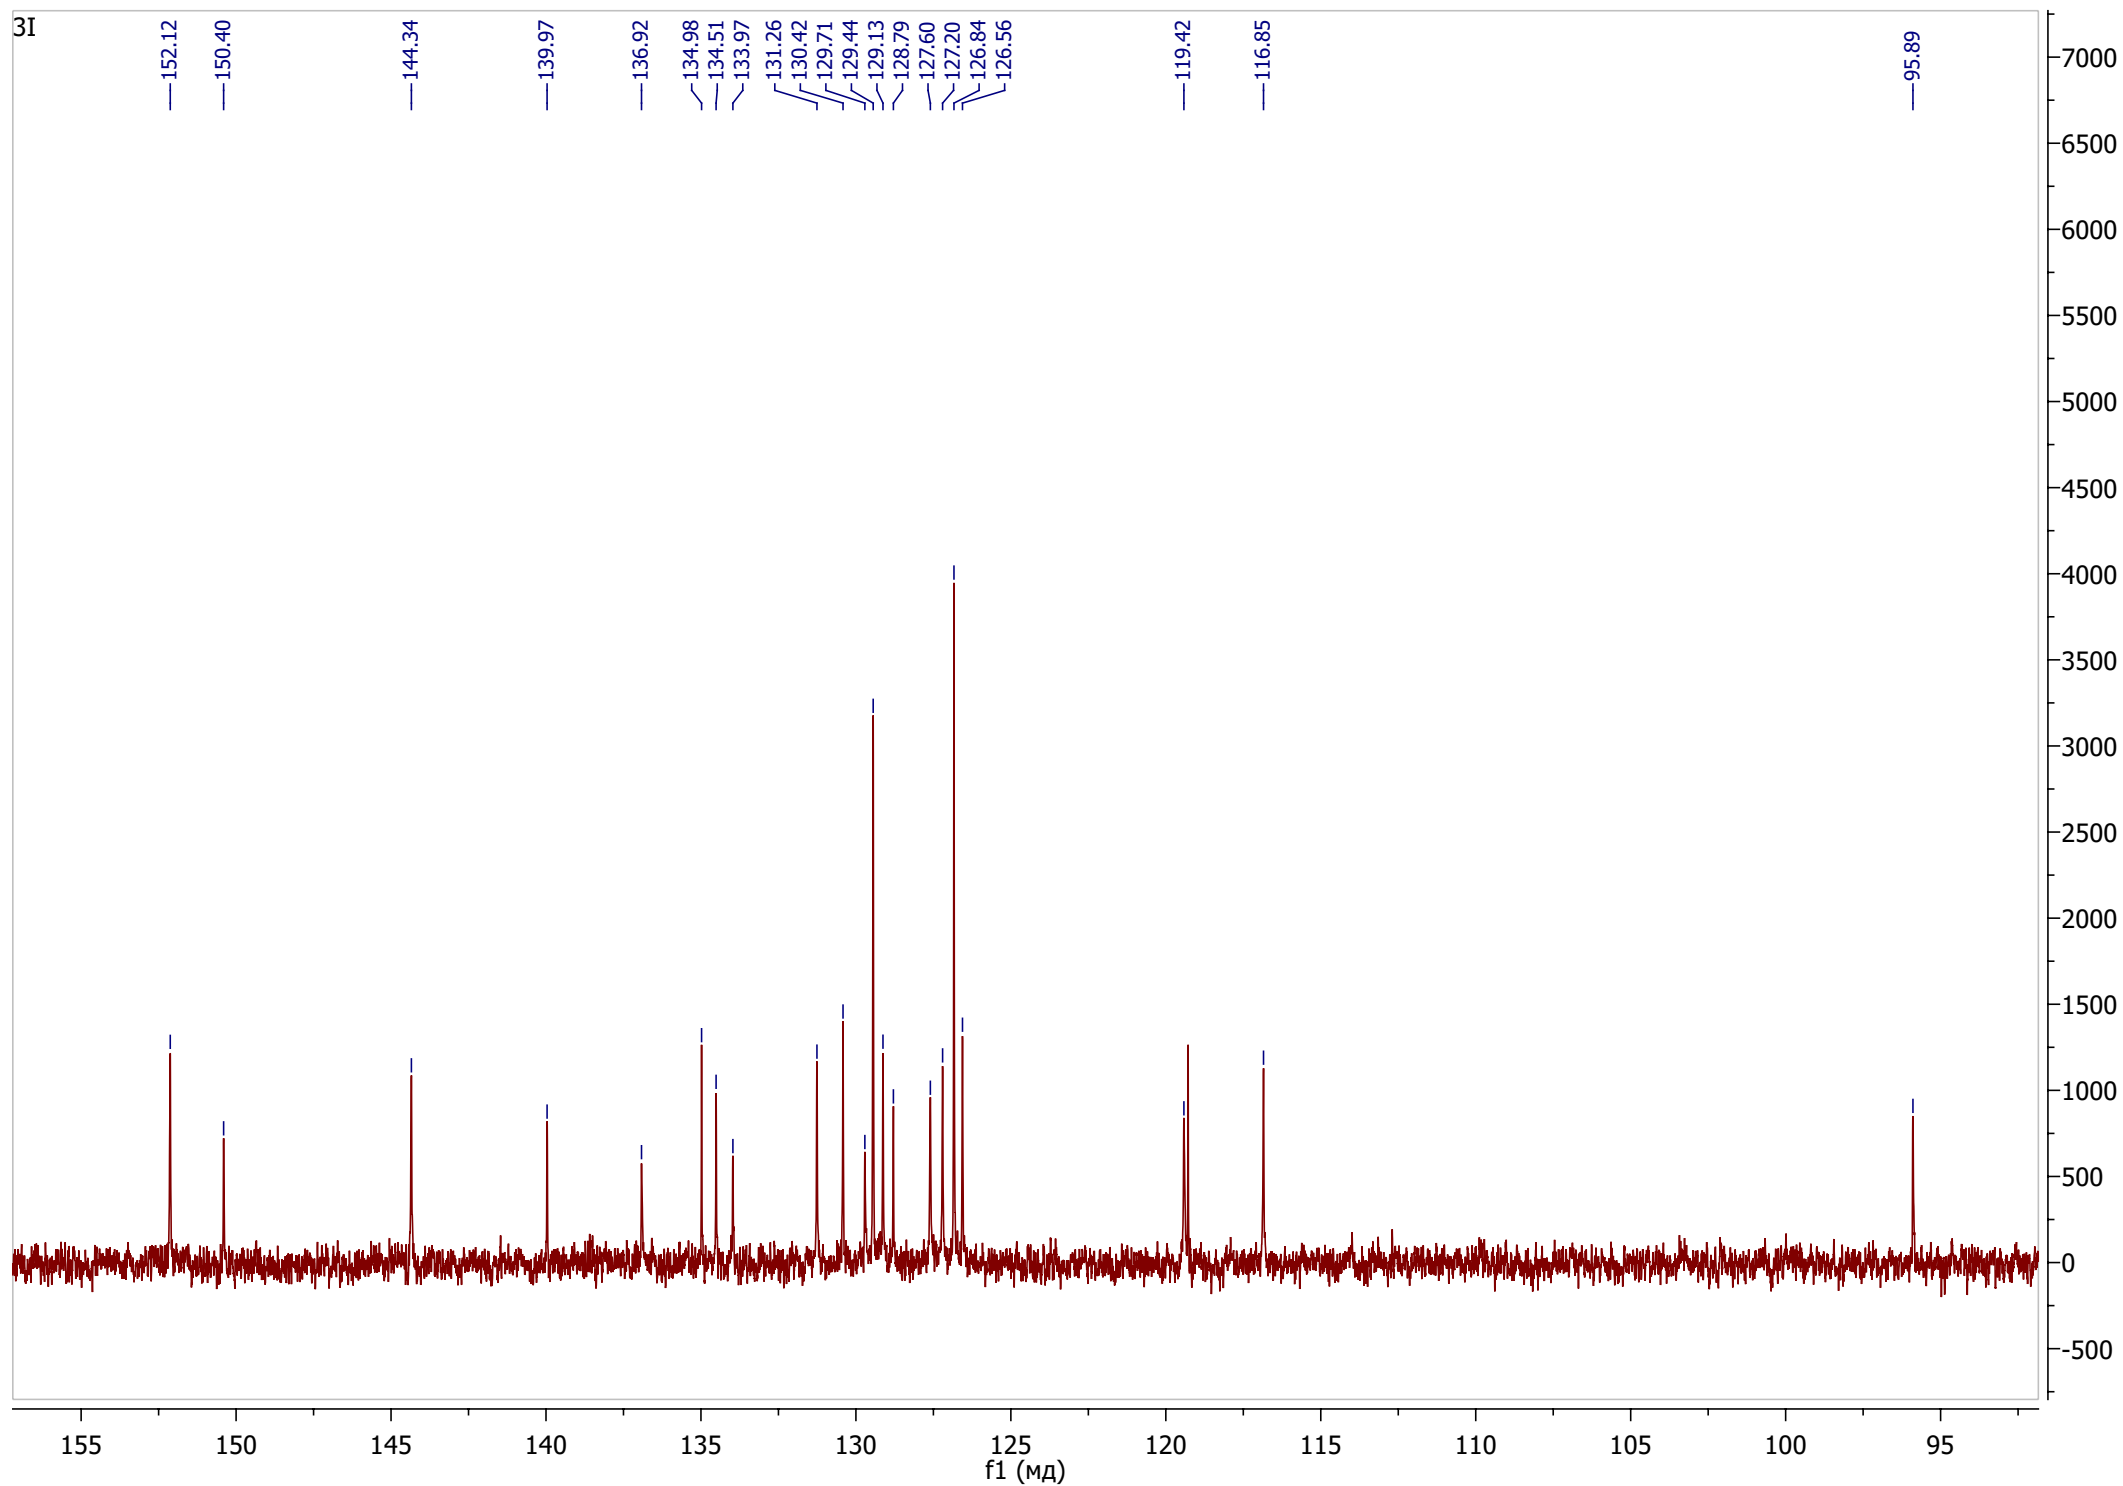

3)

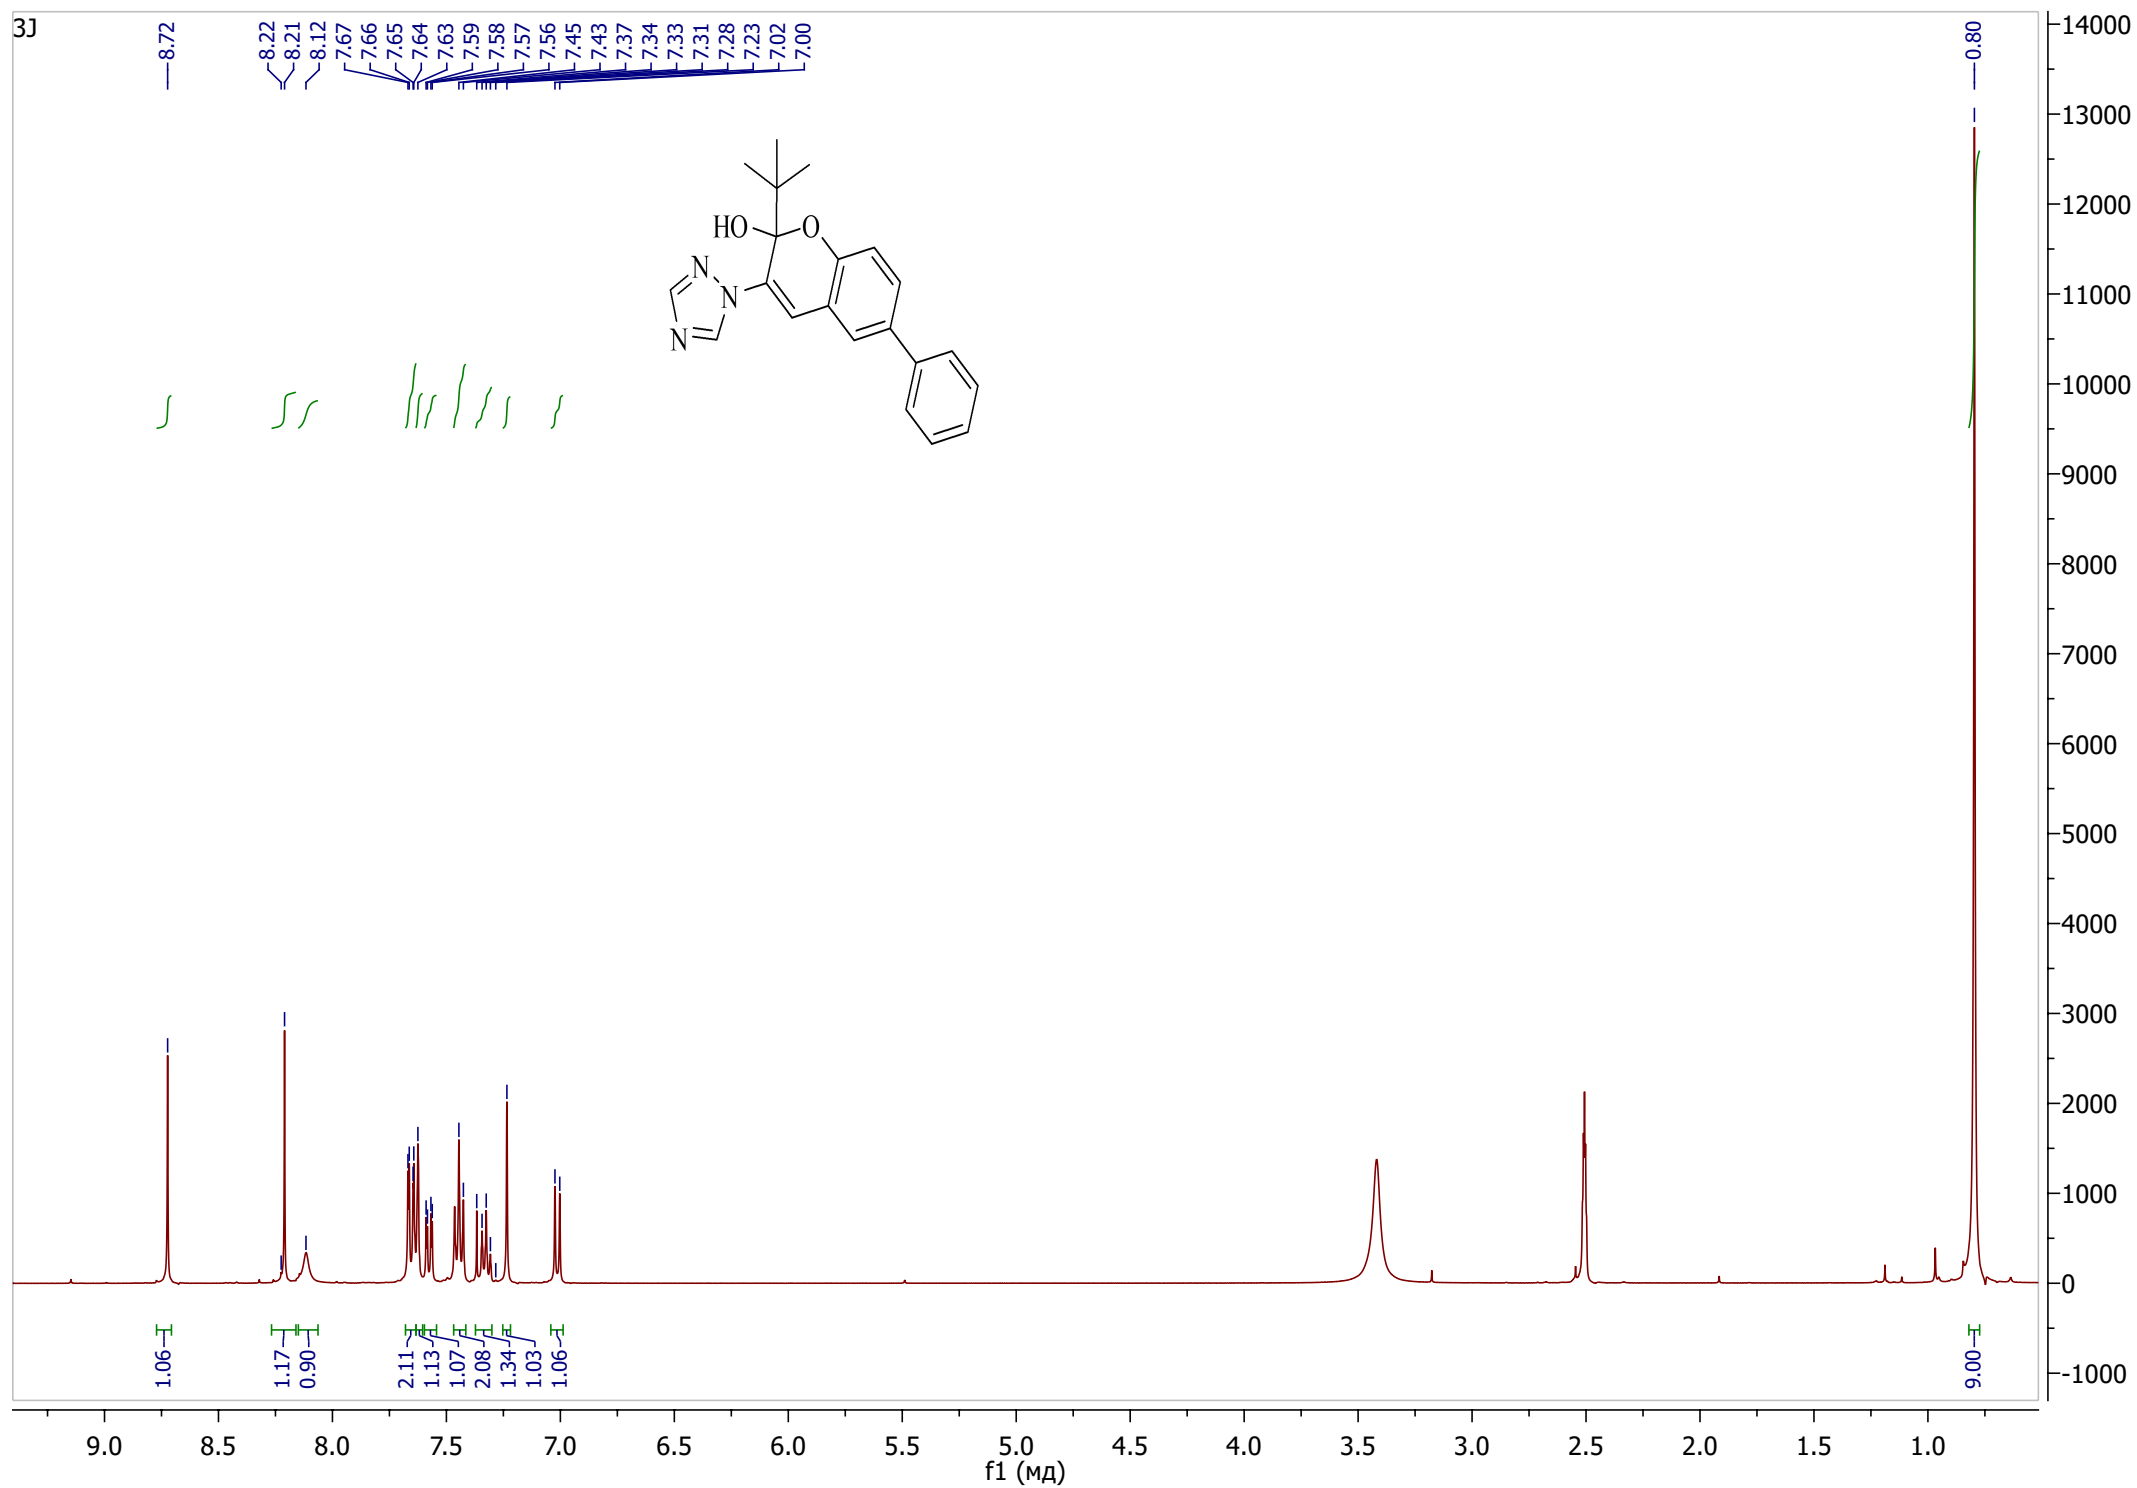

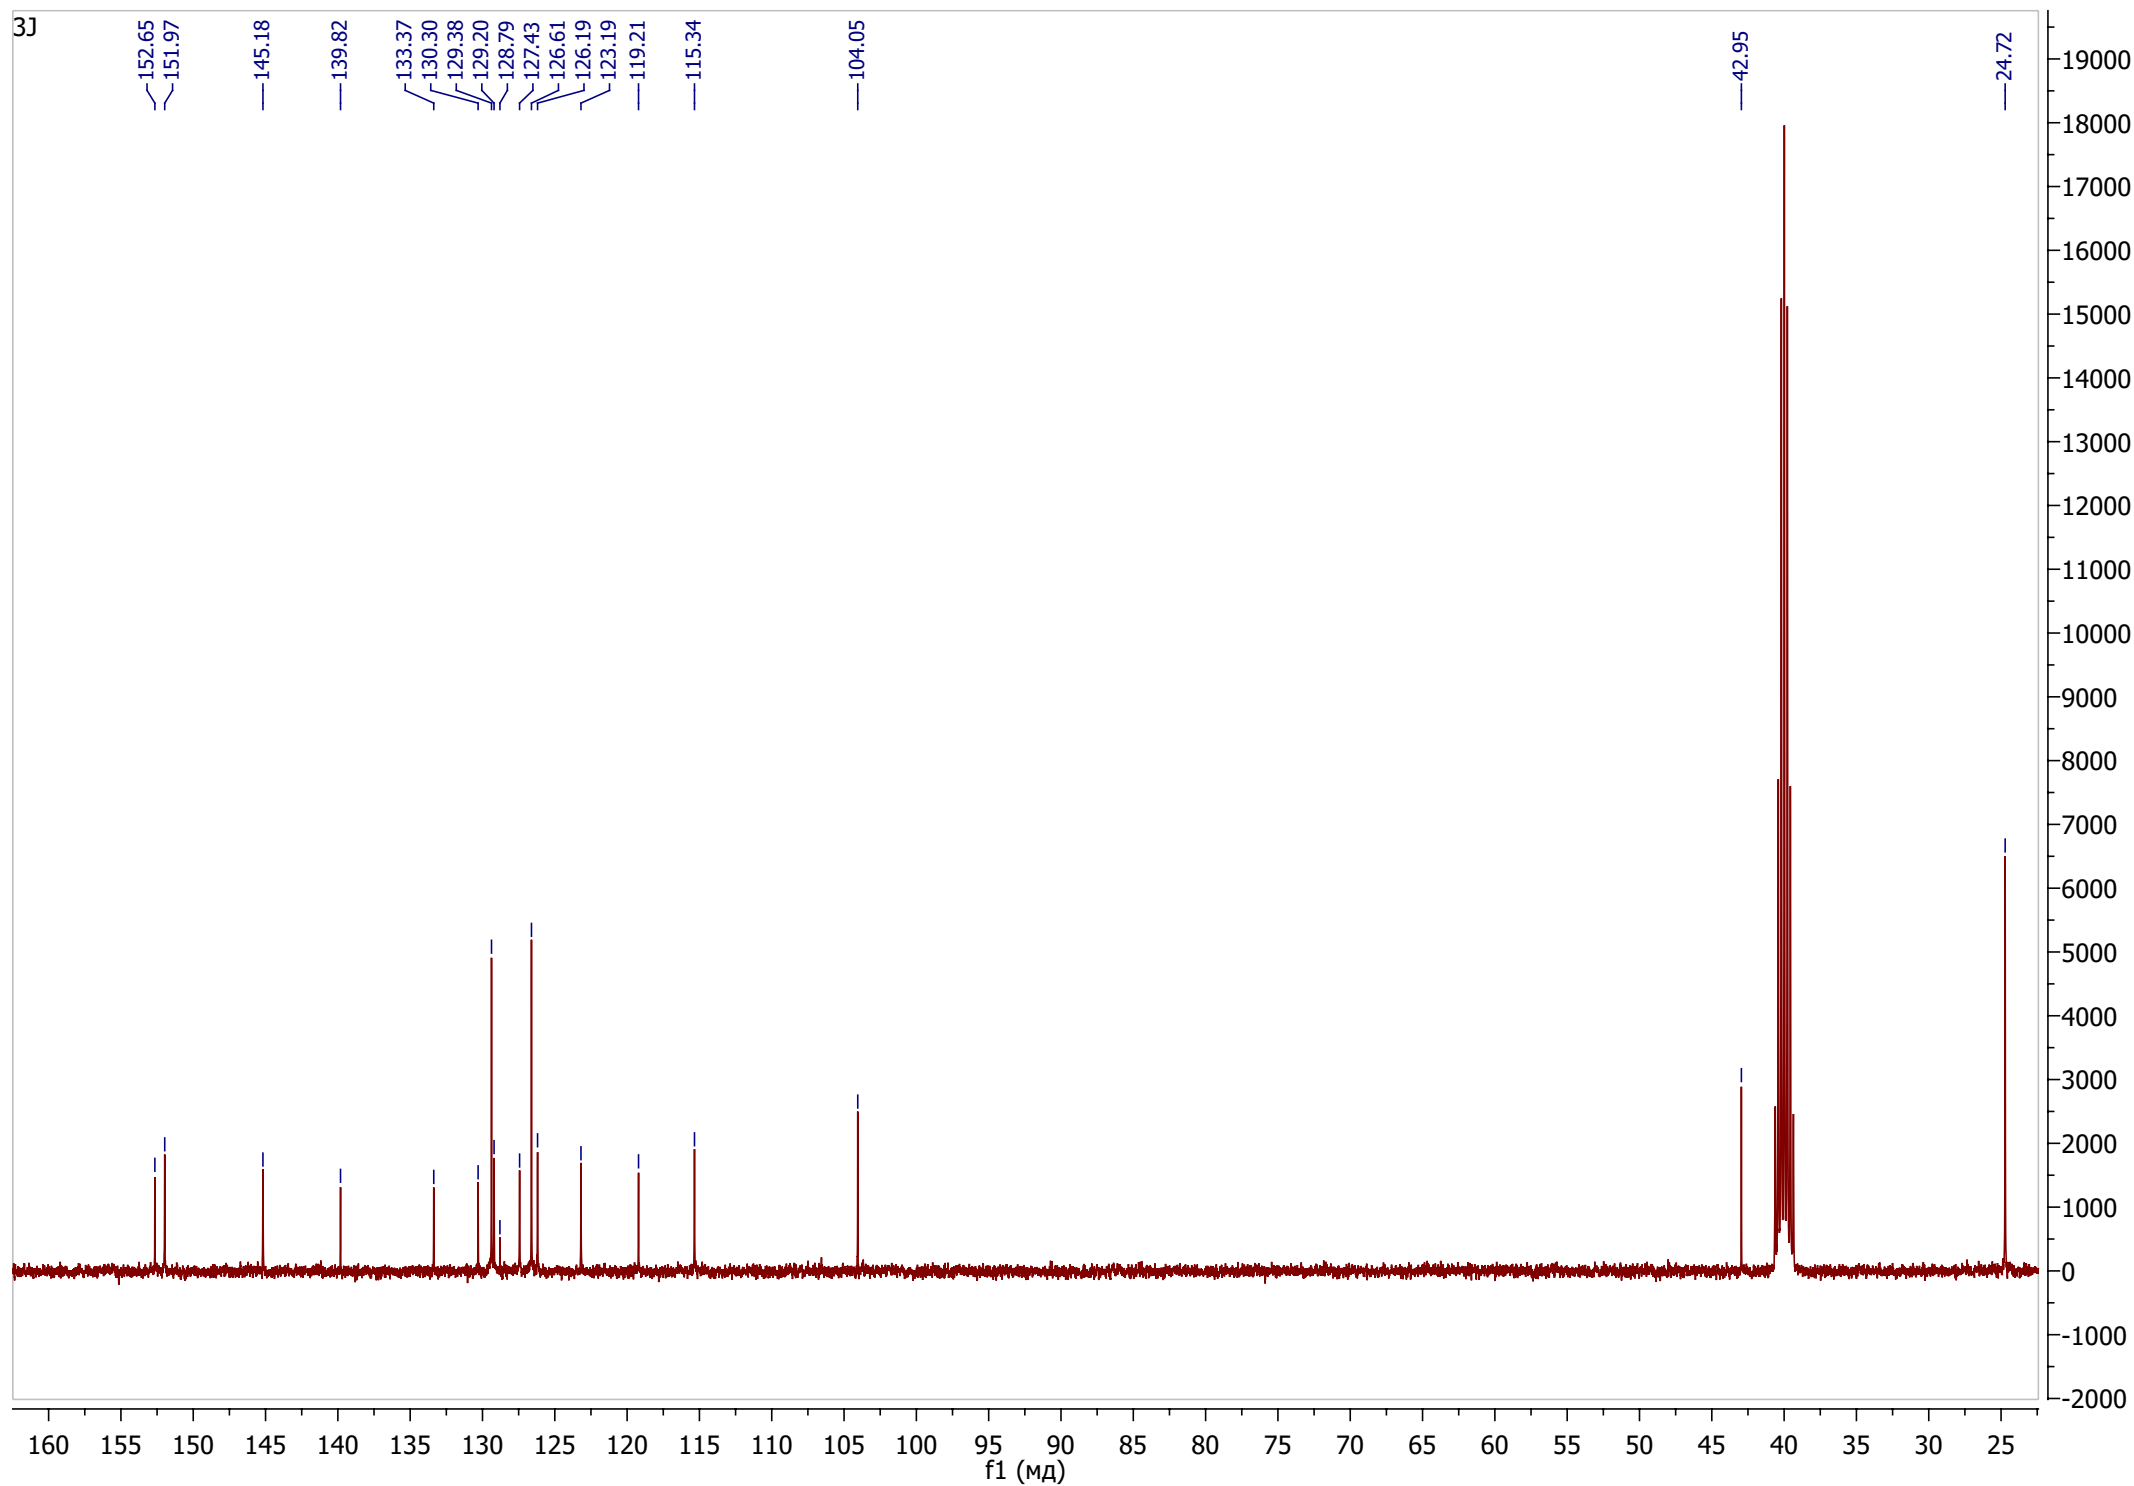

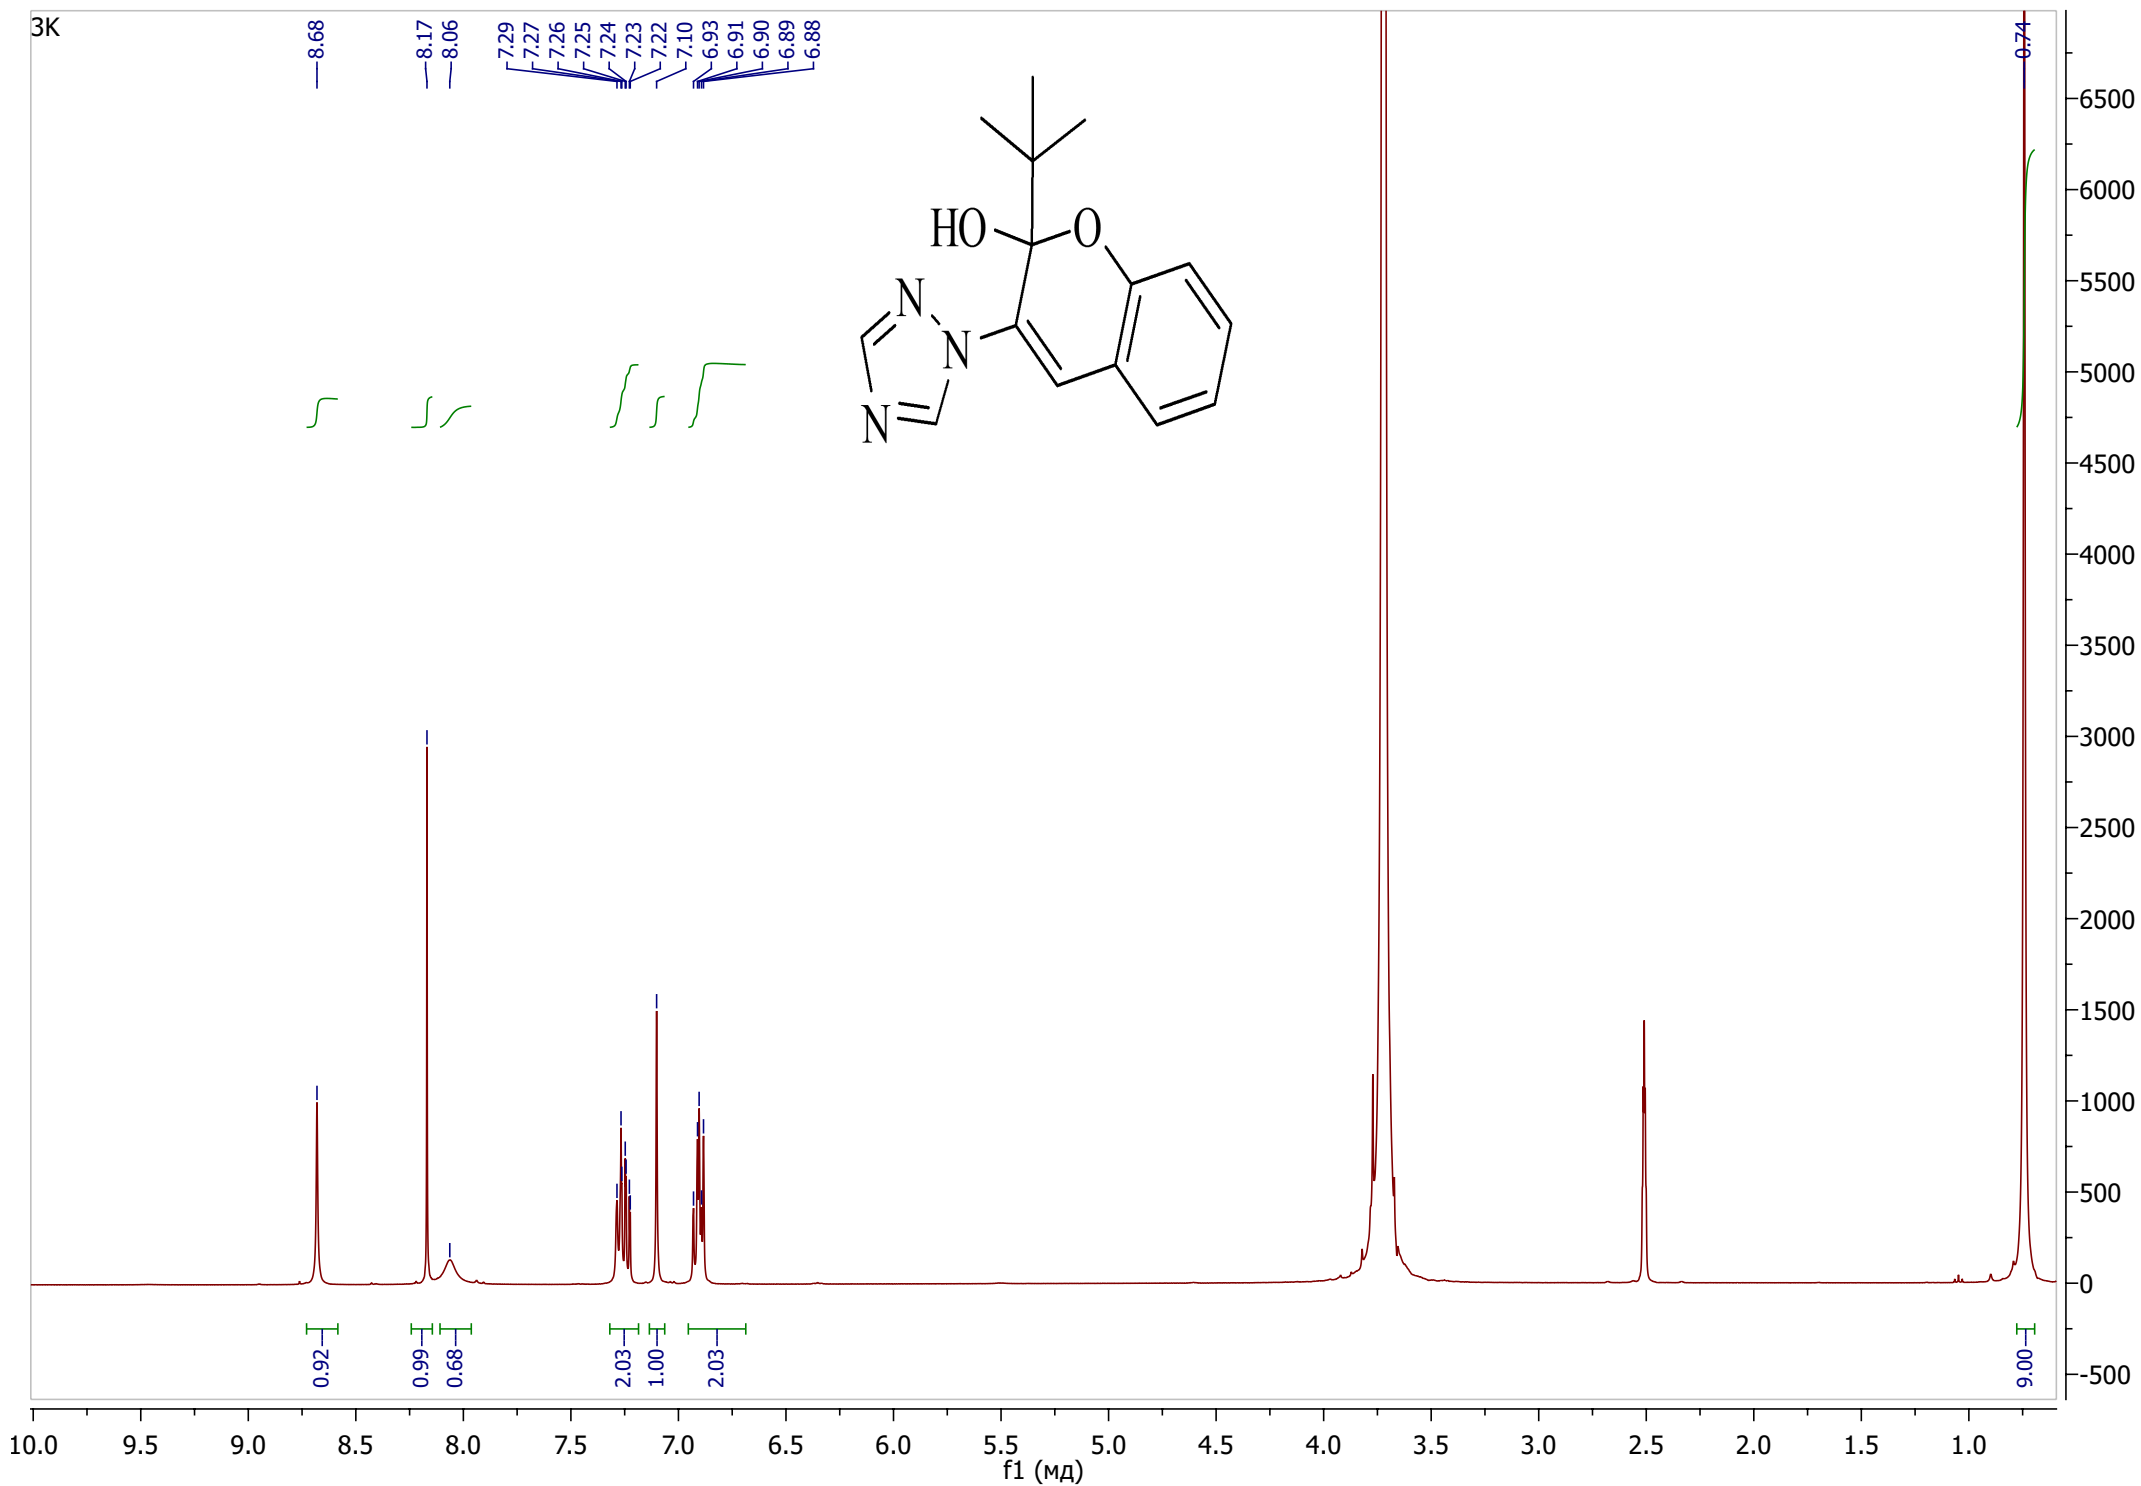

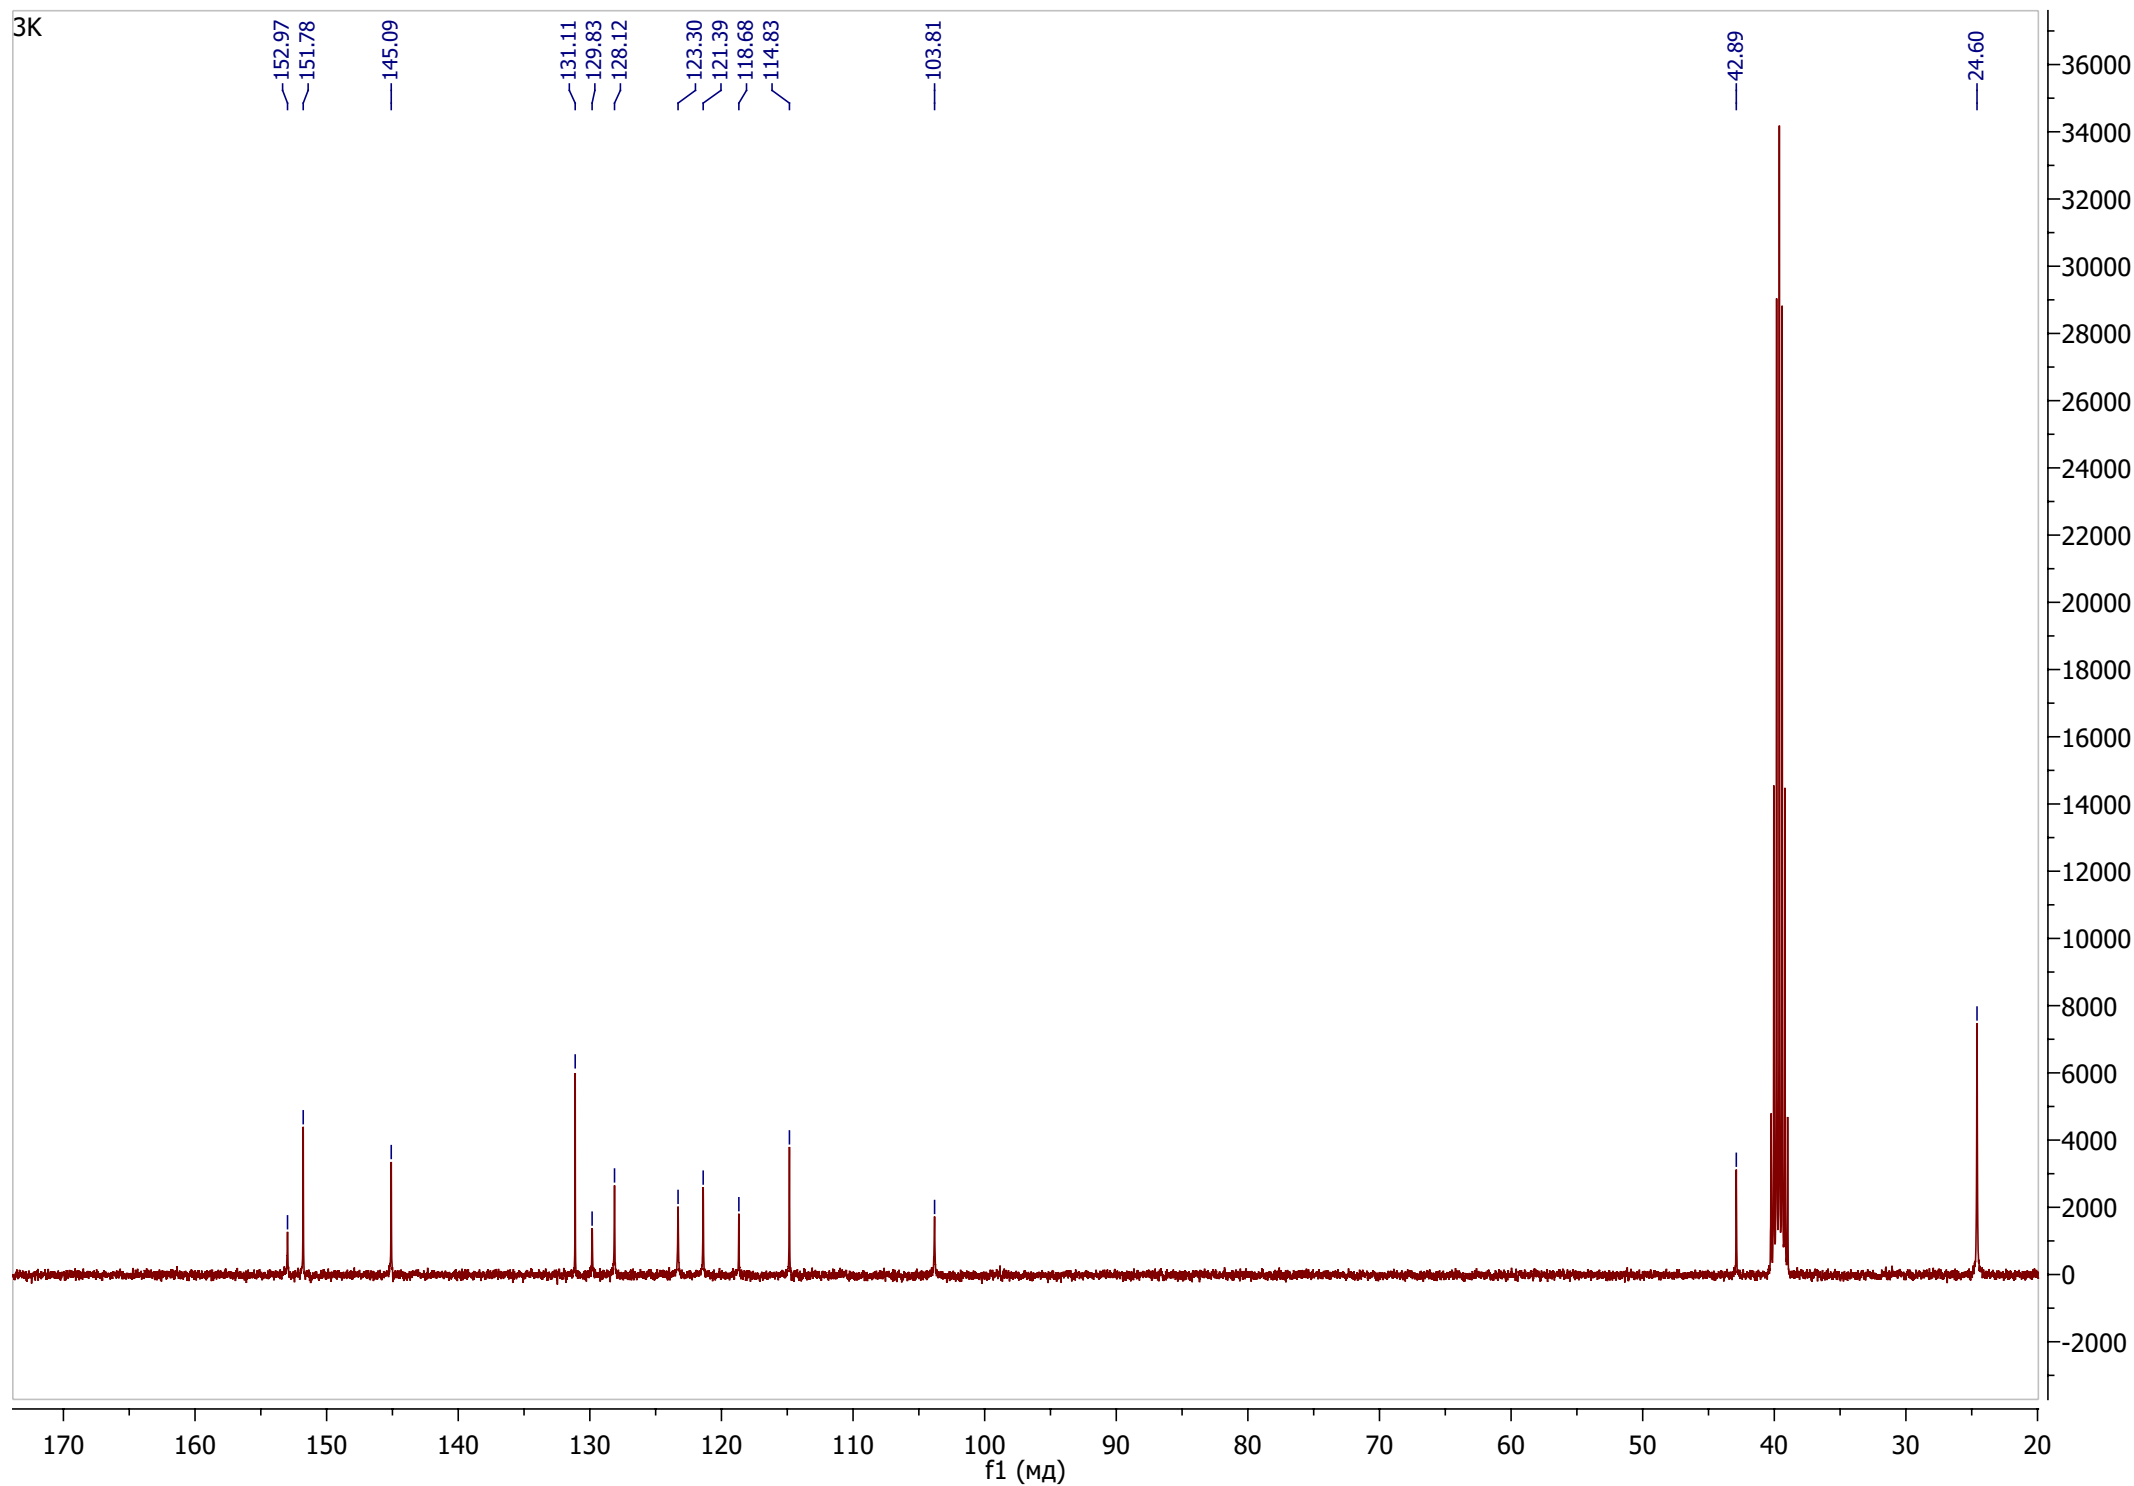

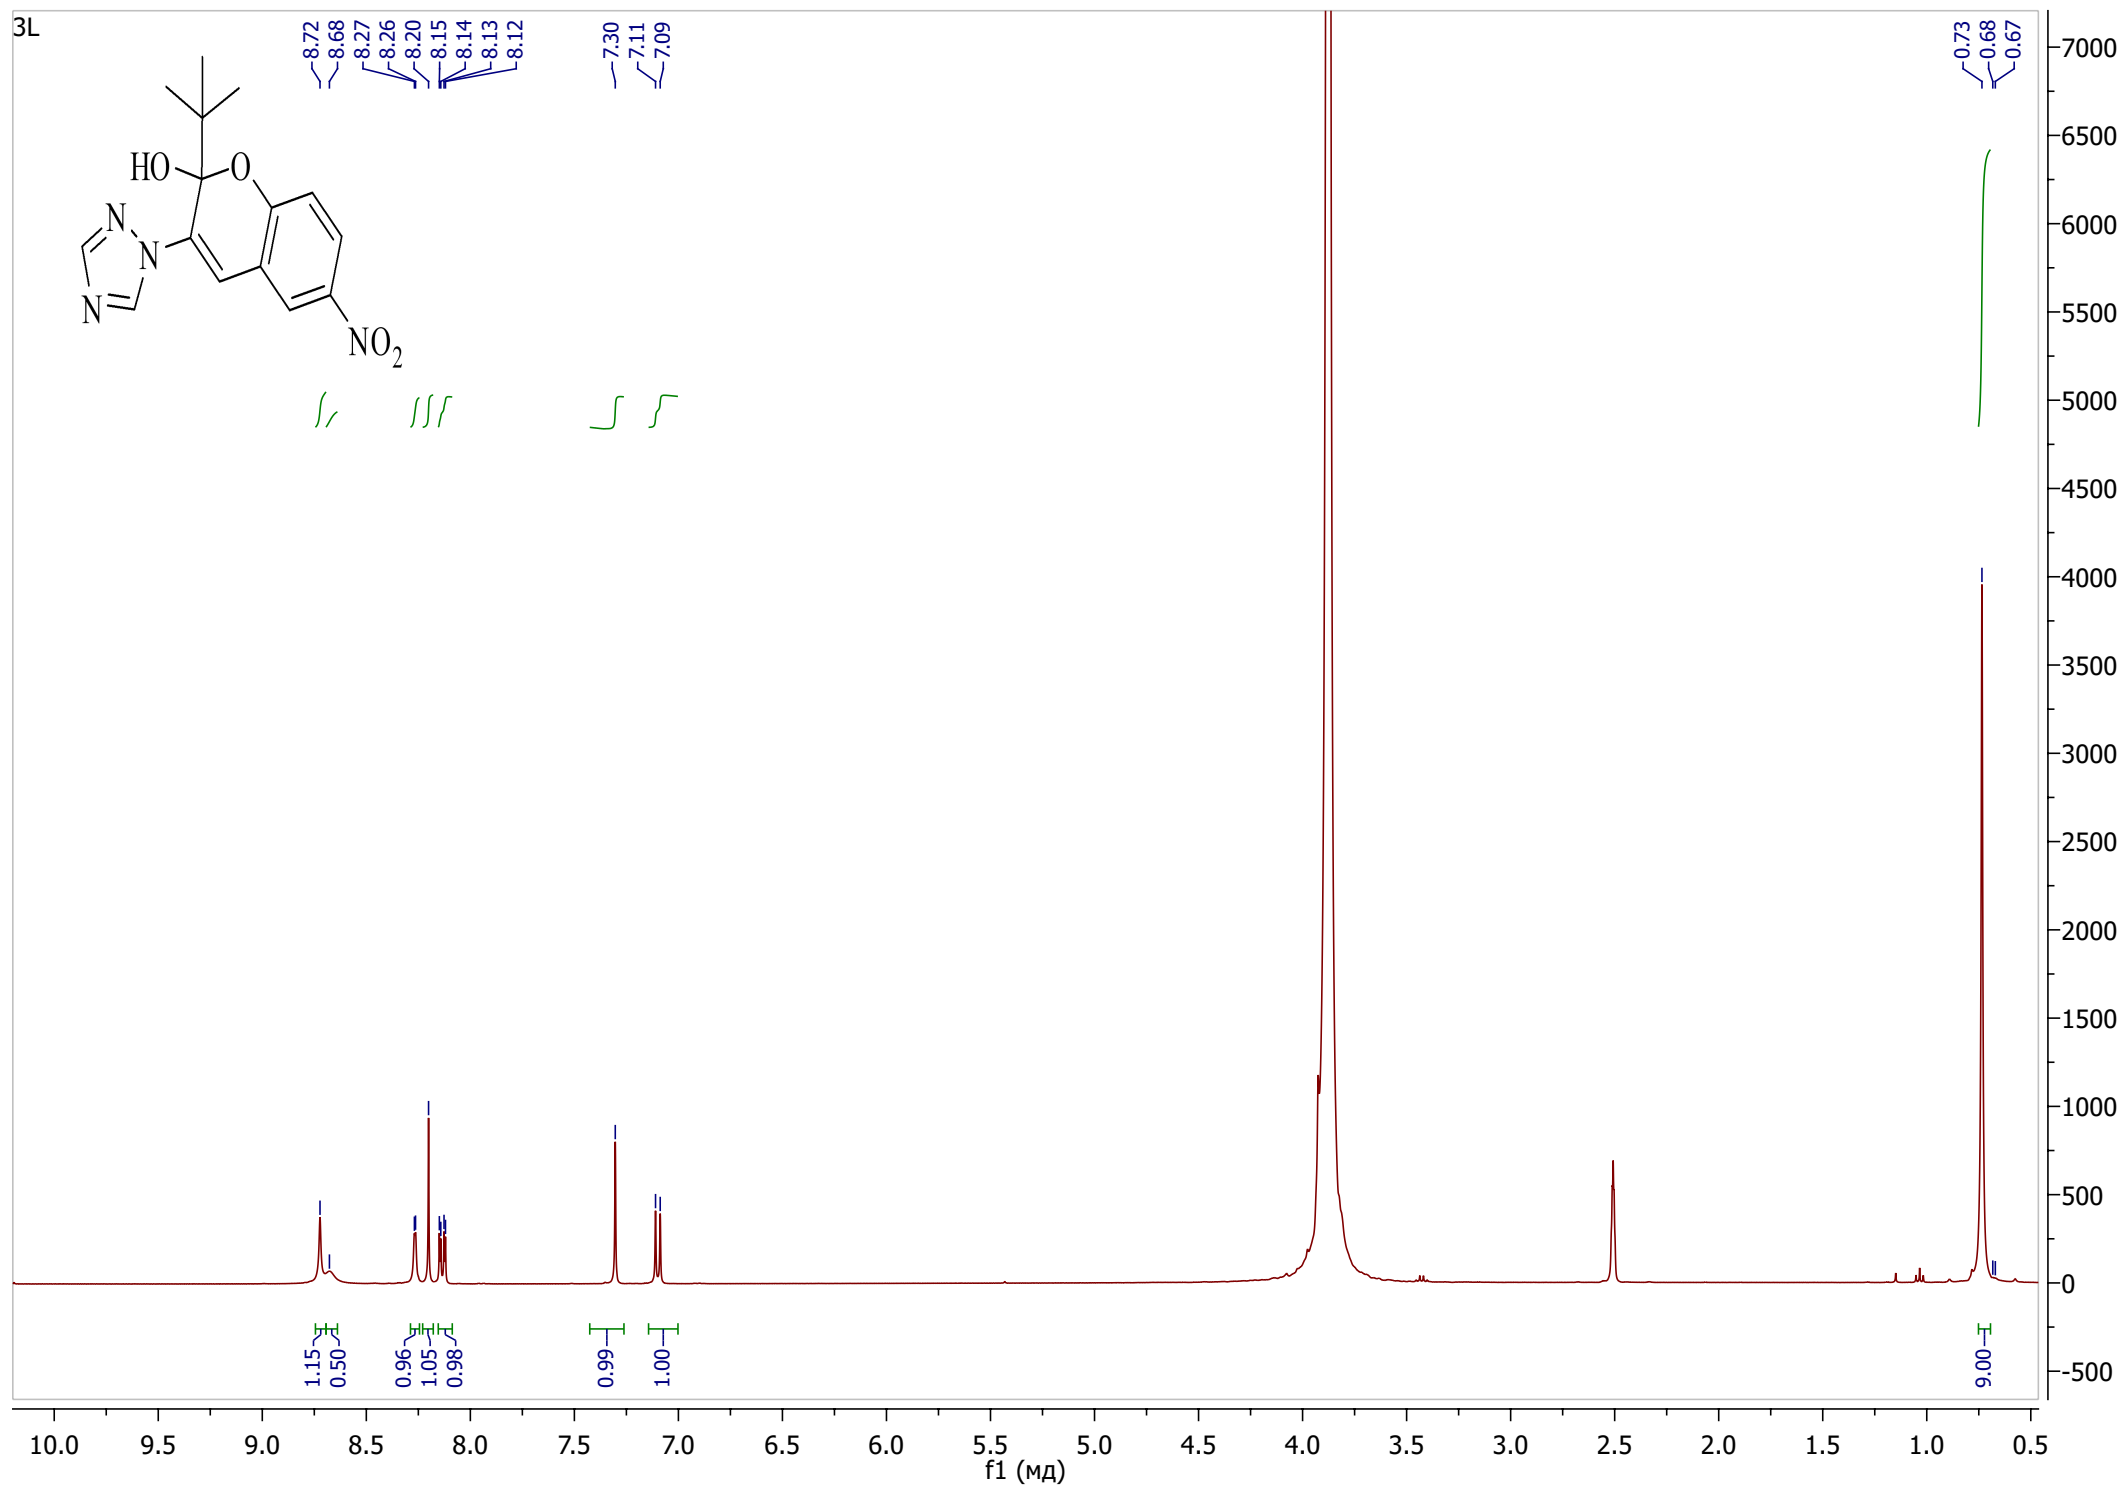

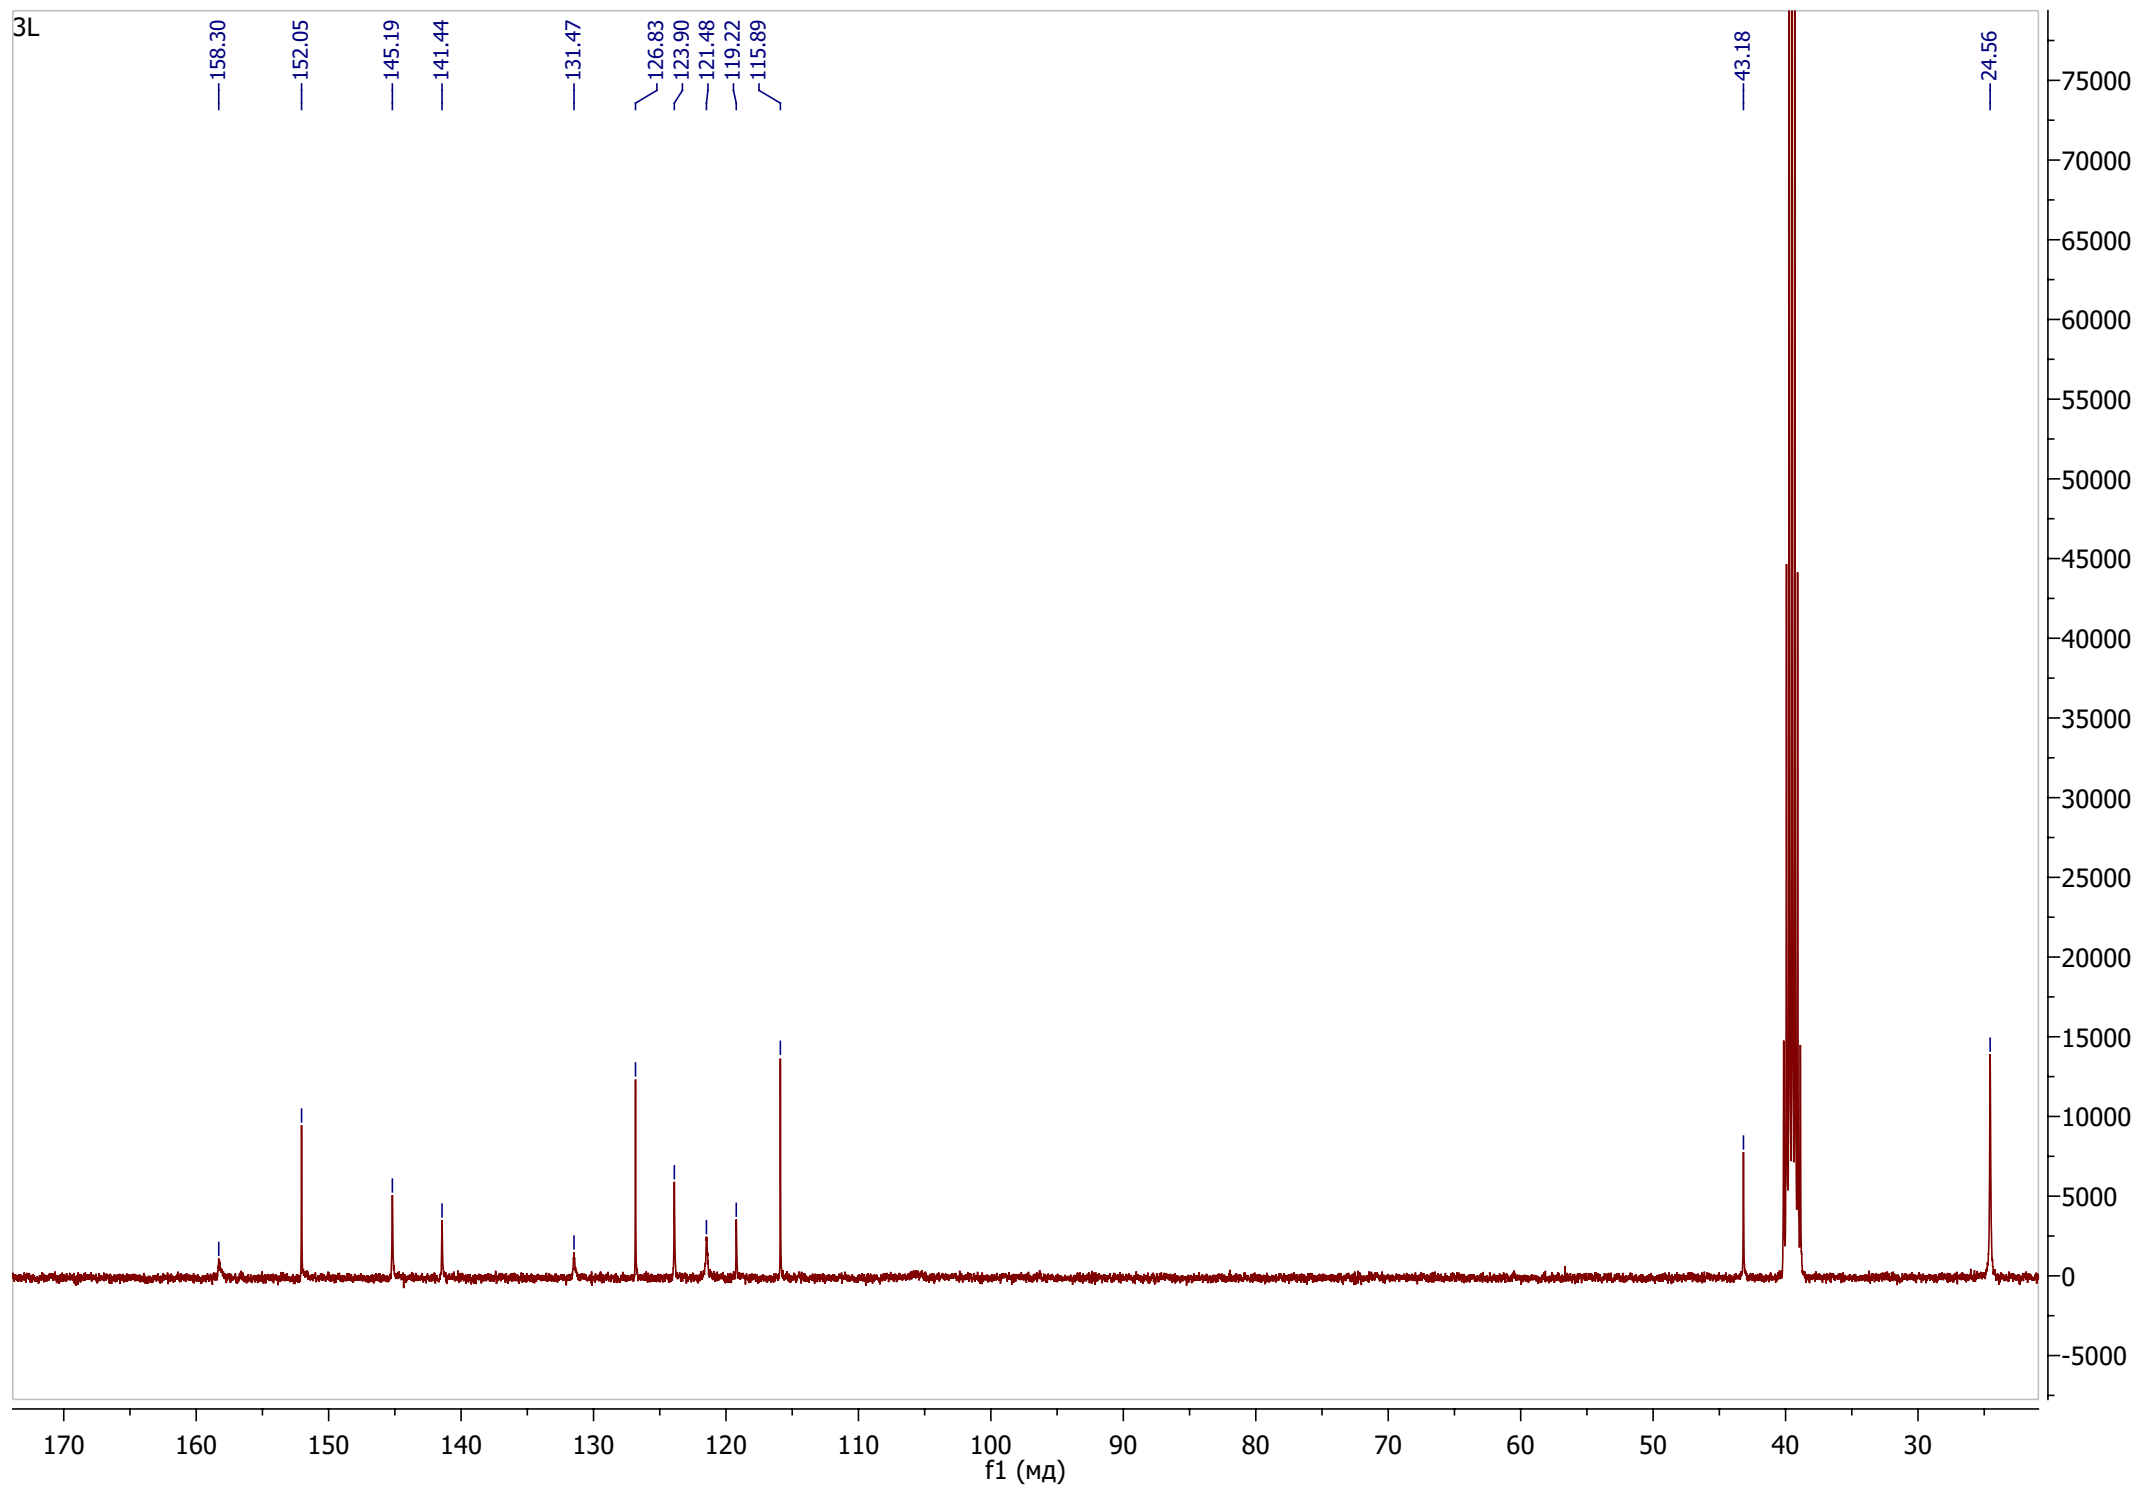



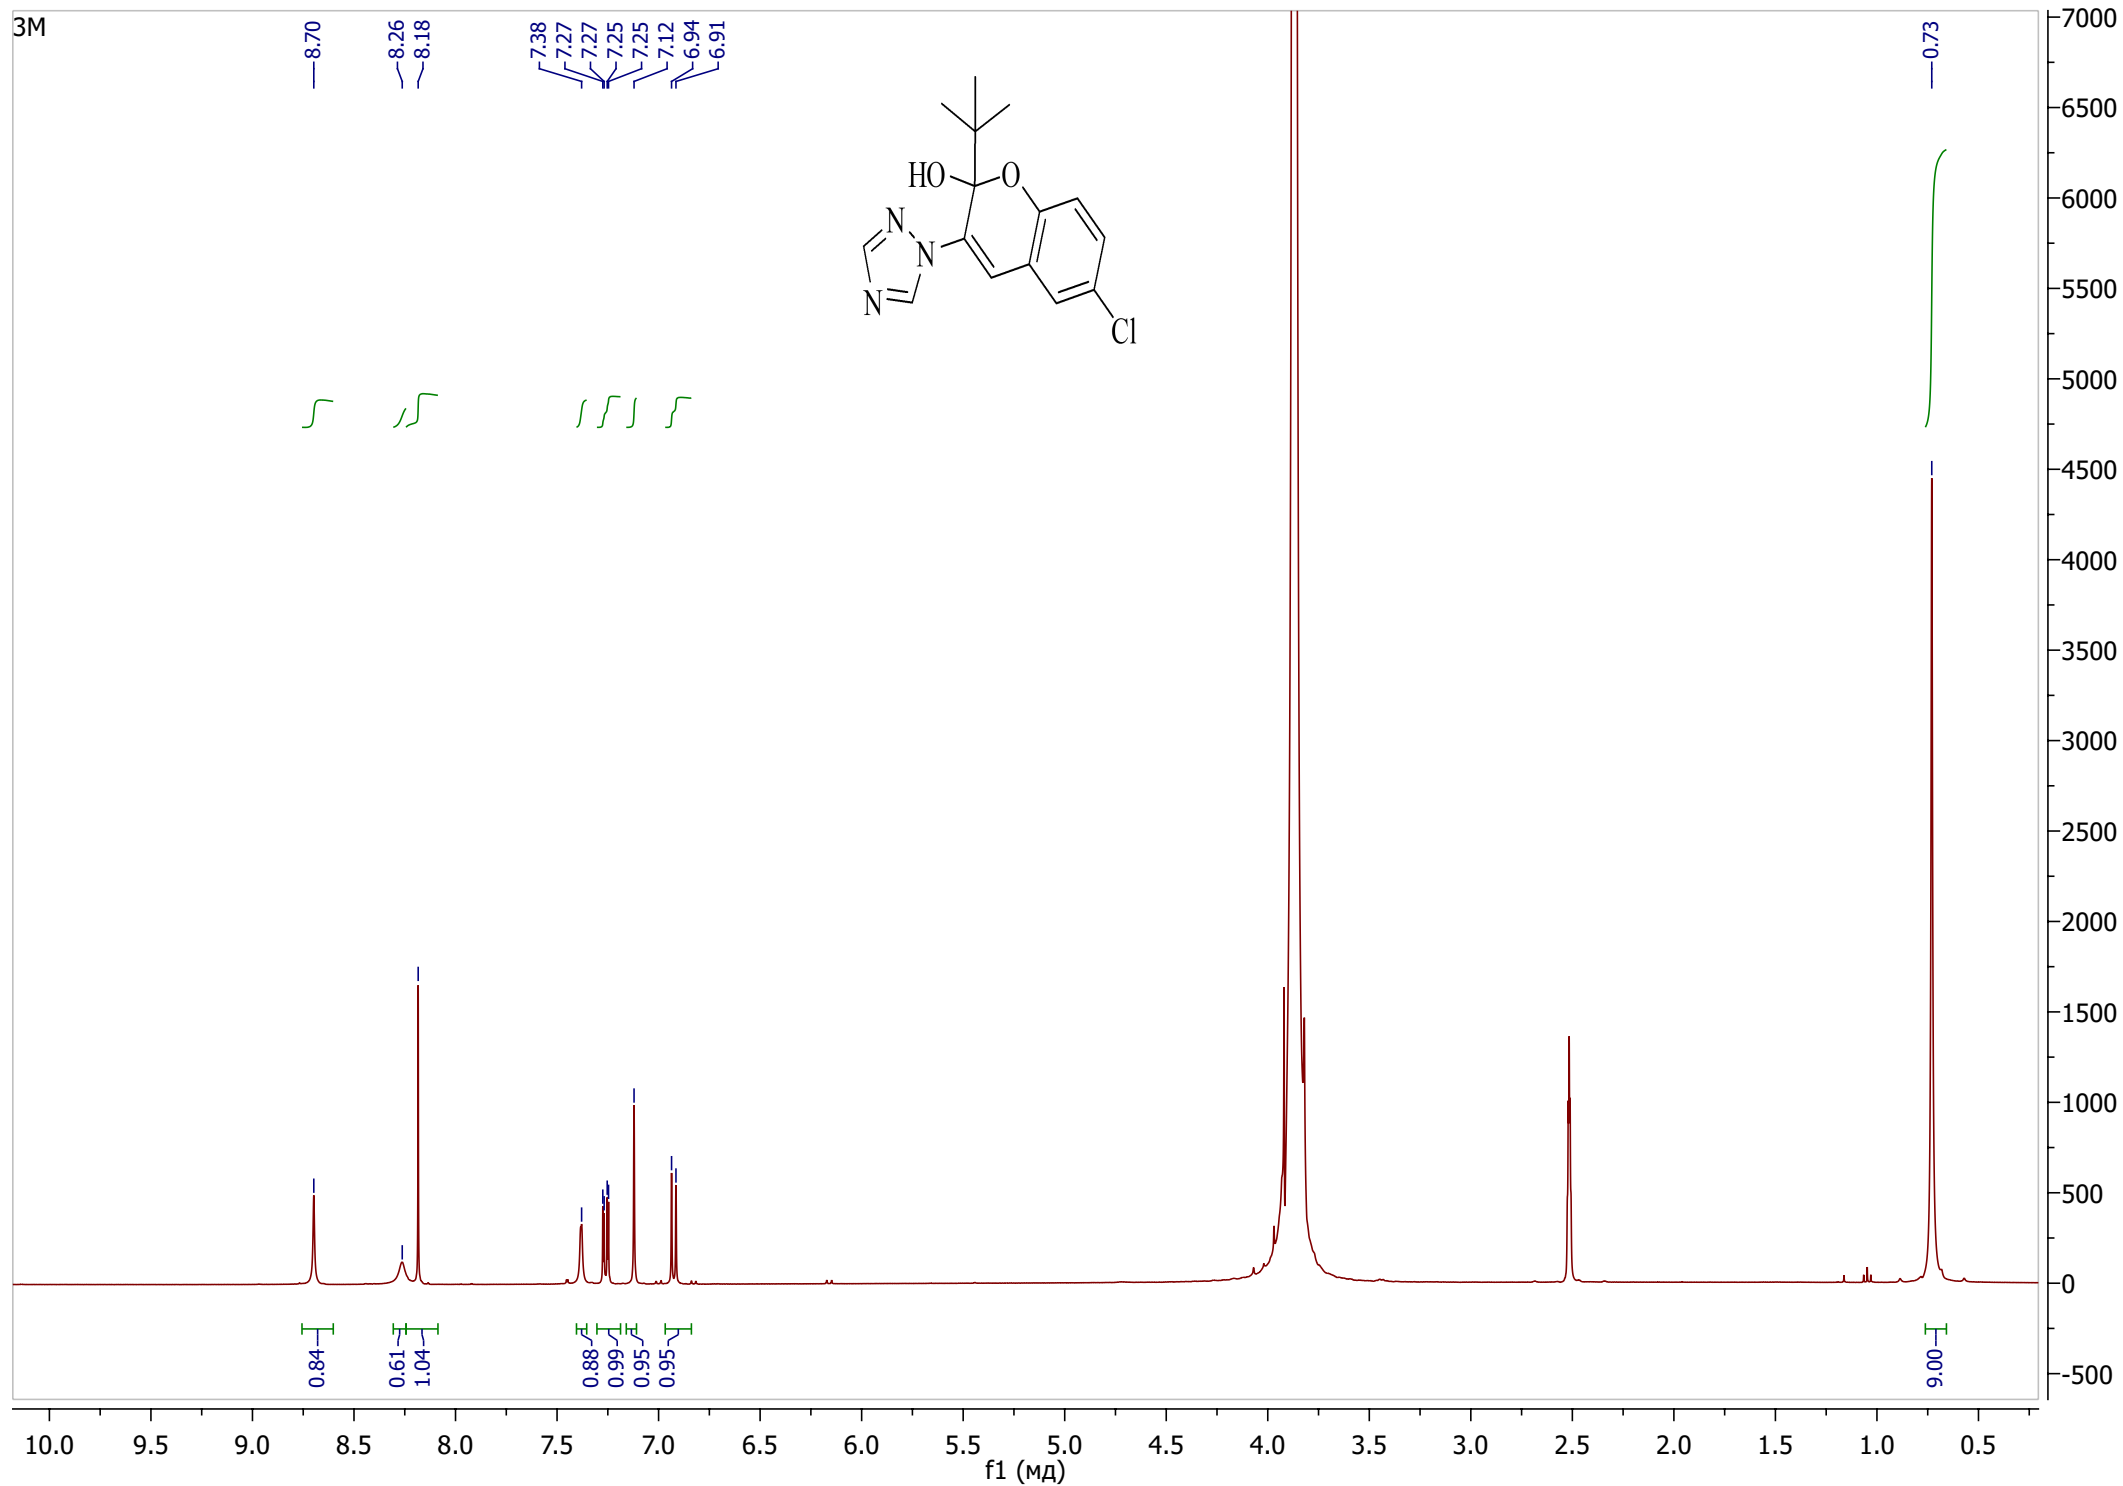

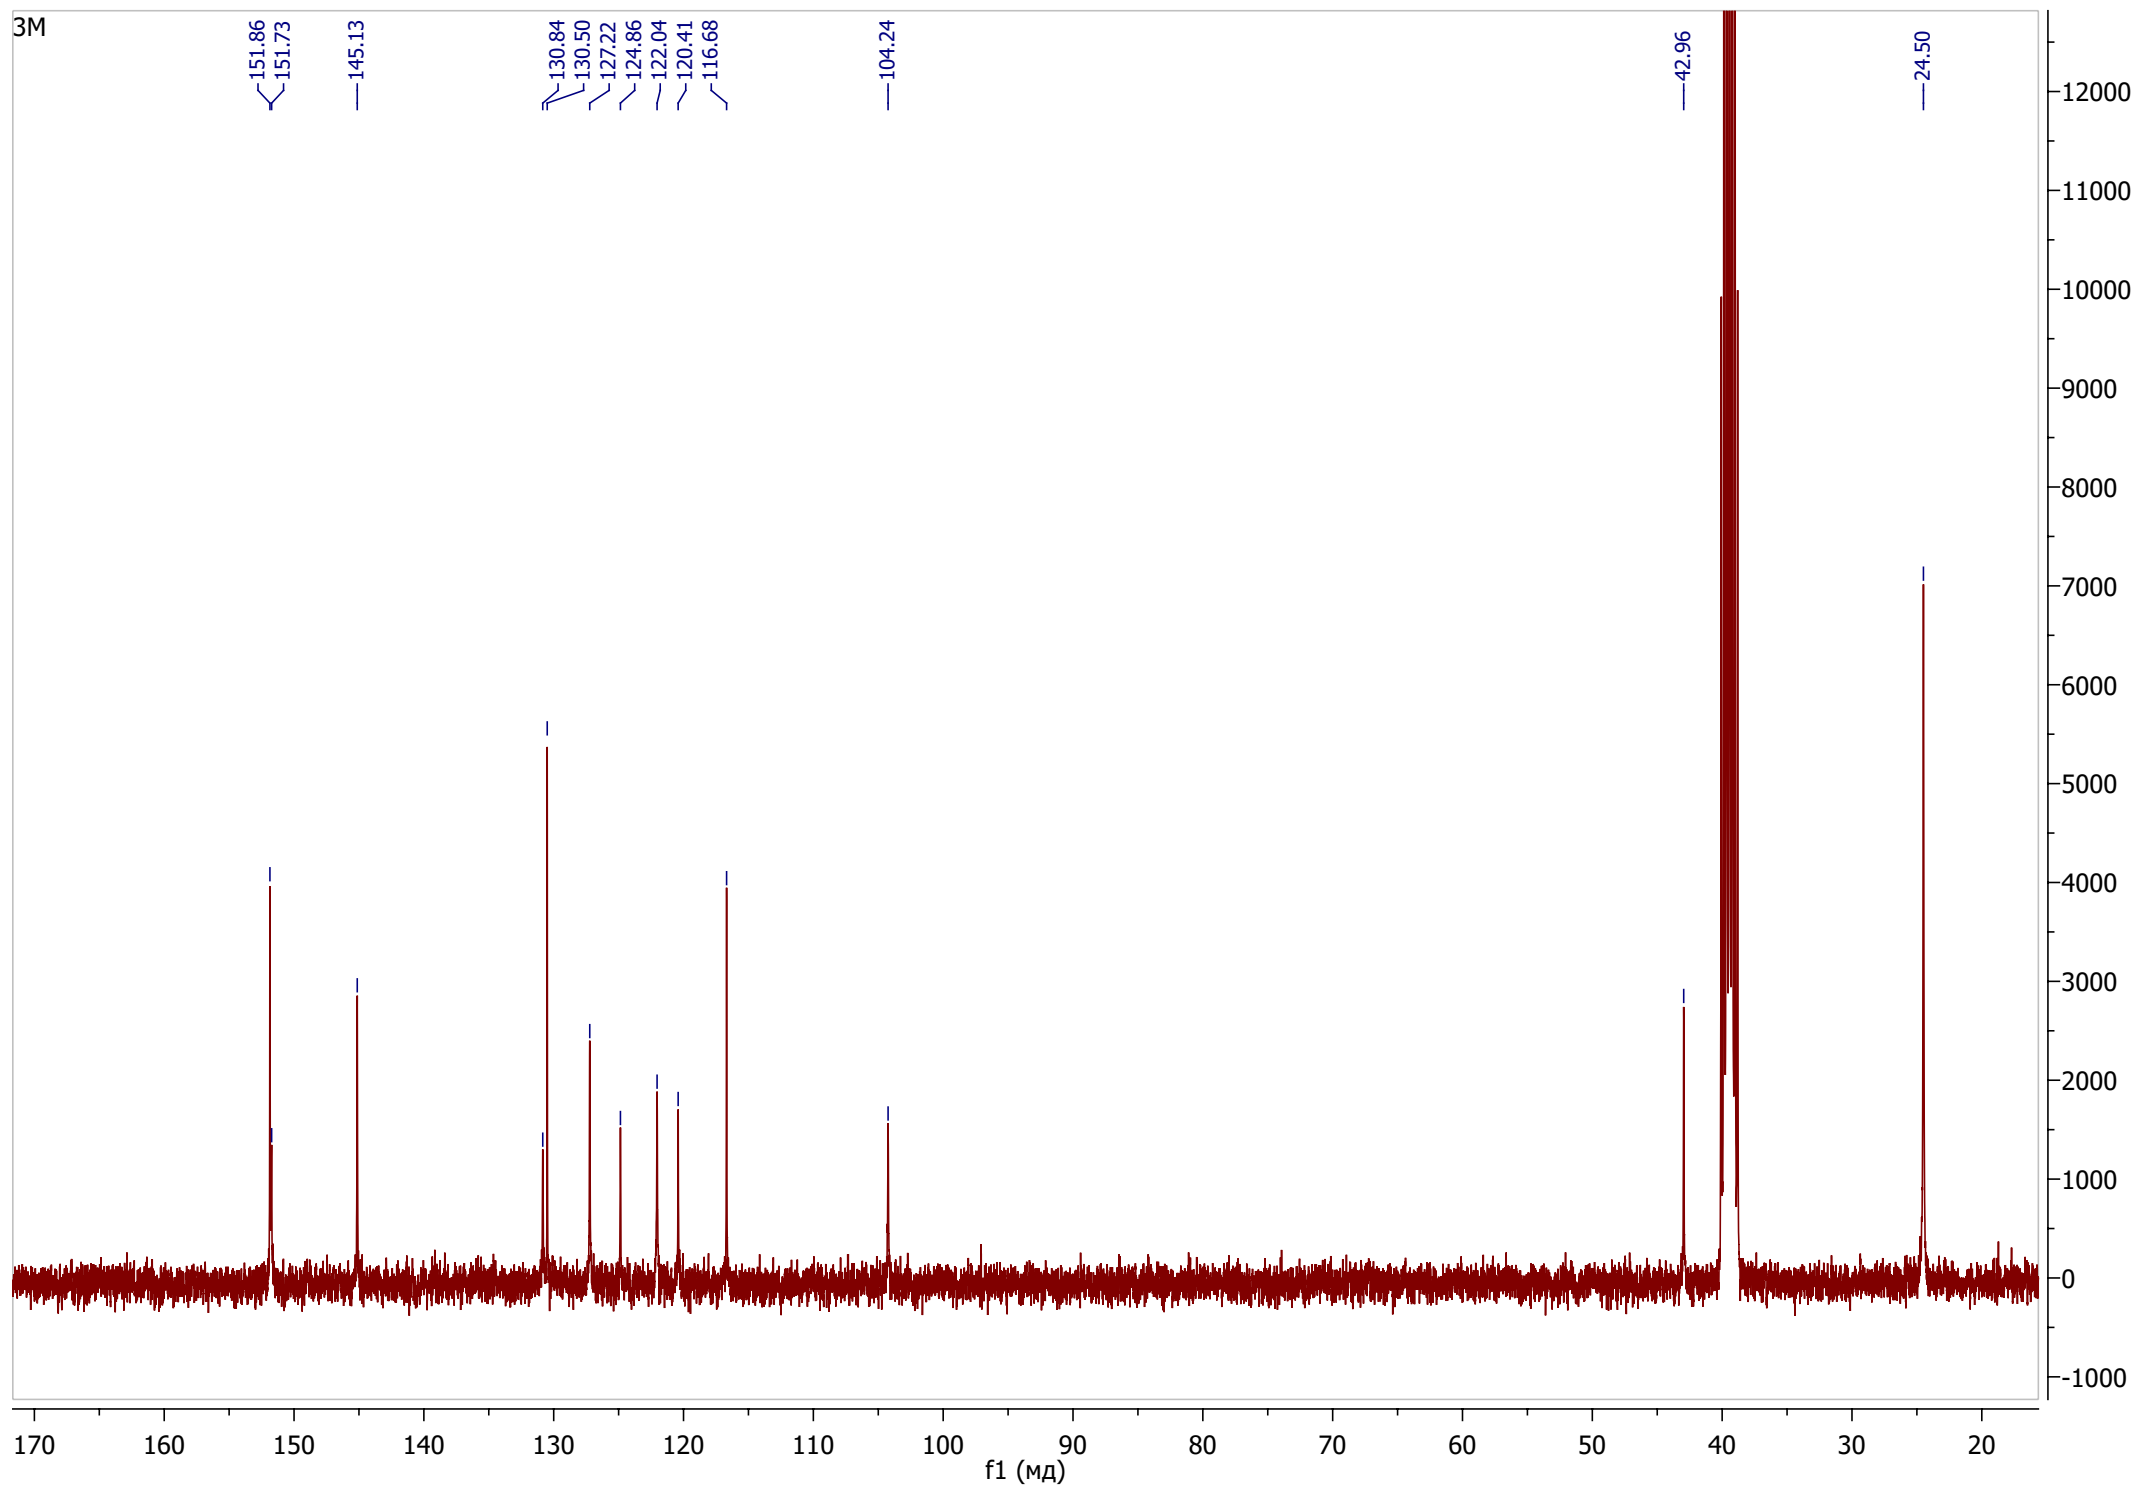

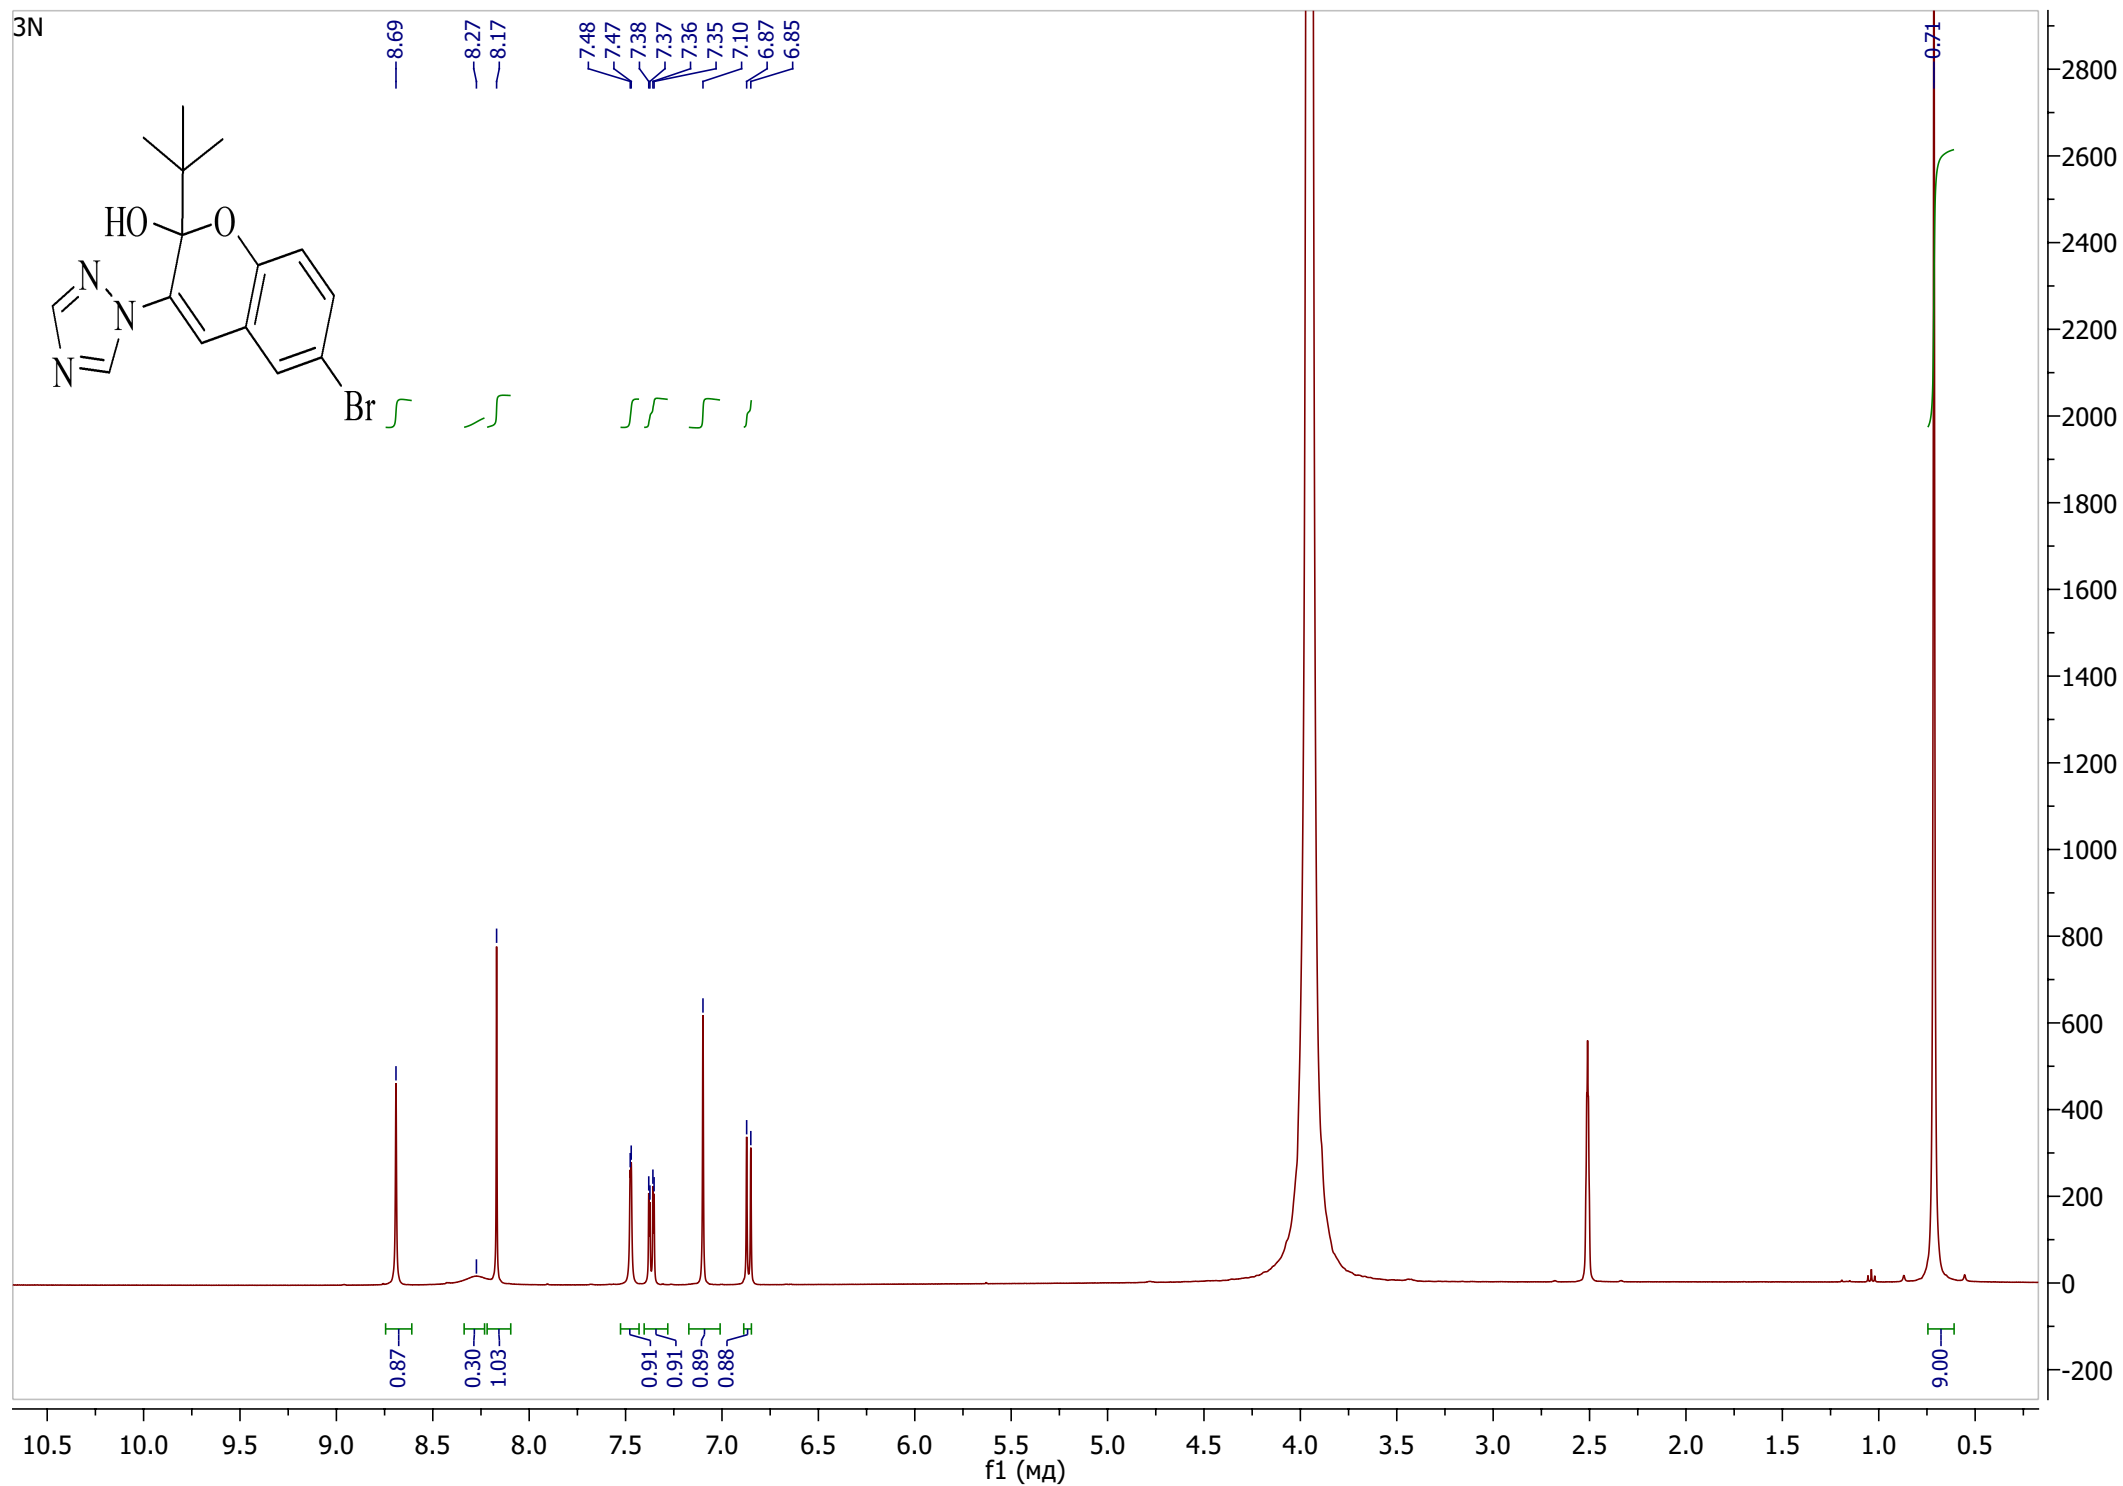

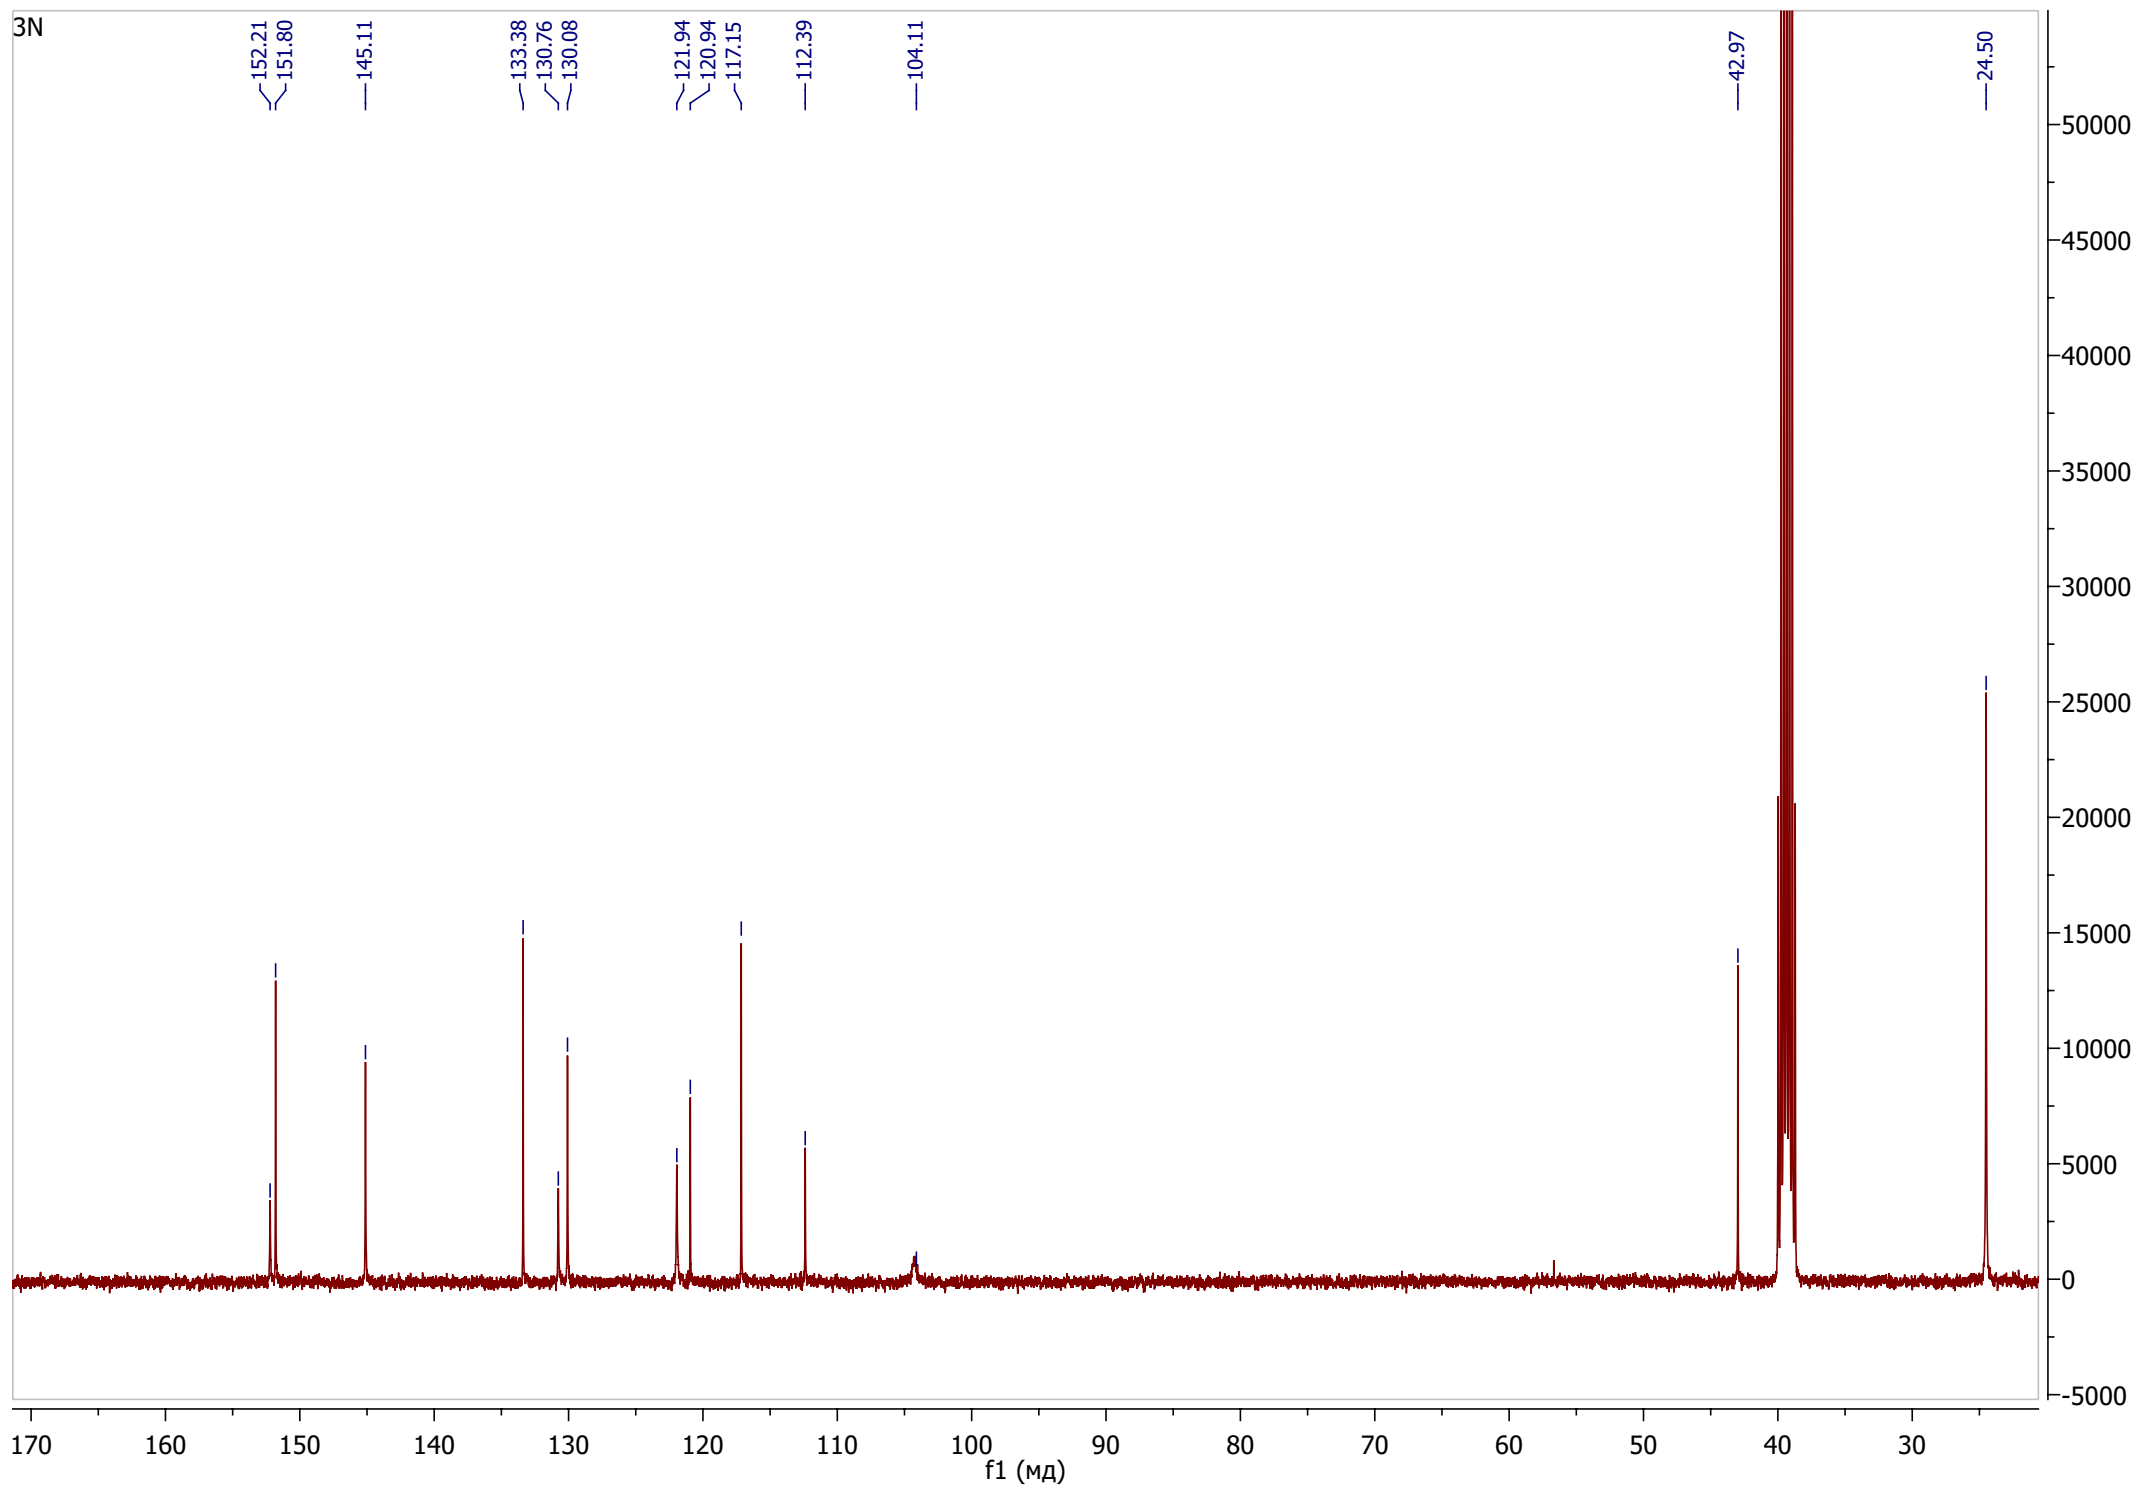

3a

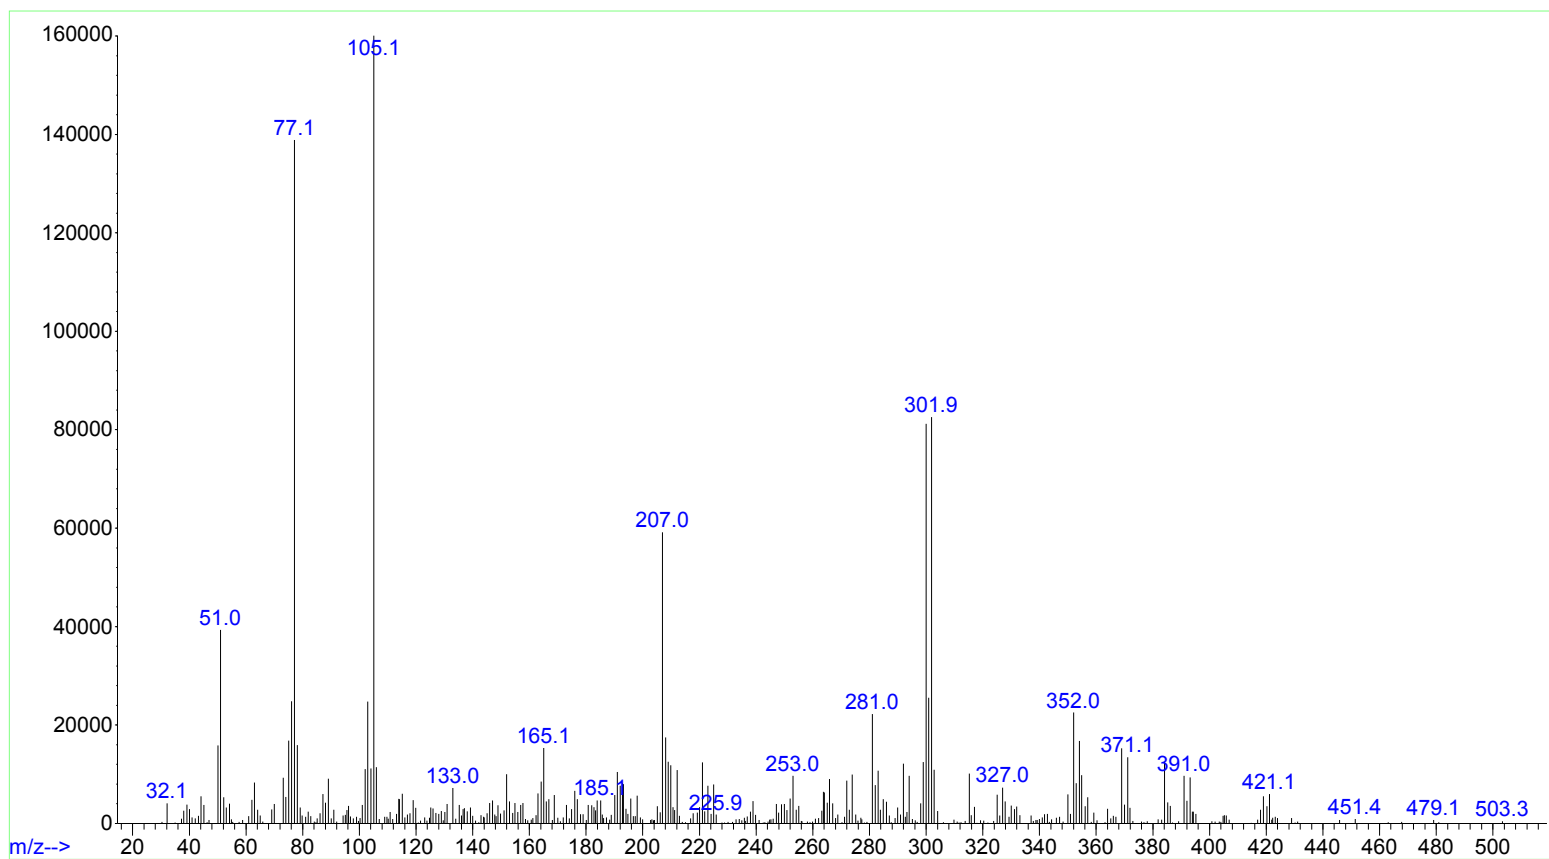

3b

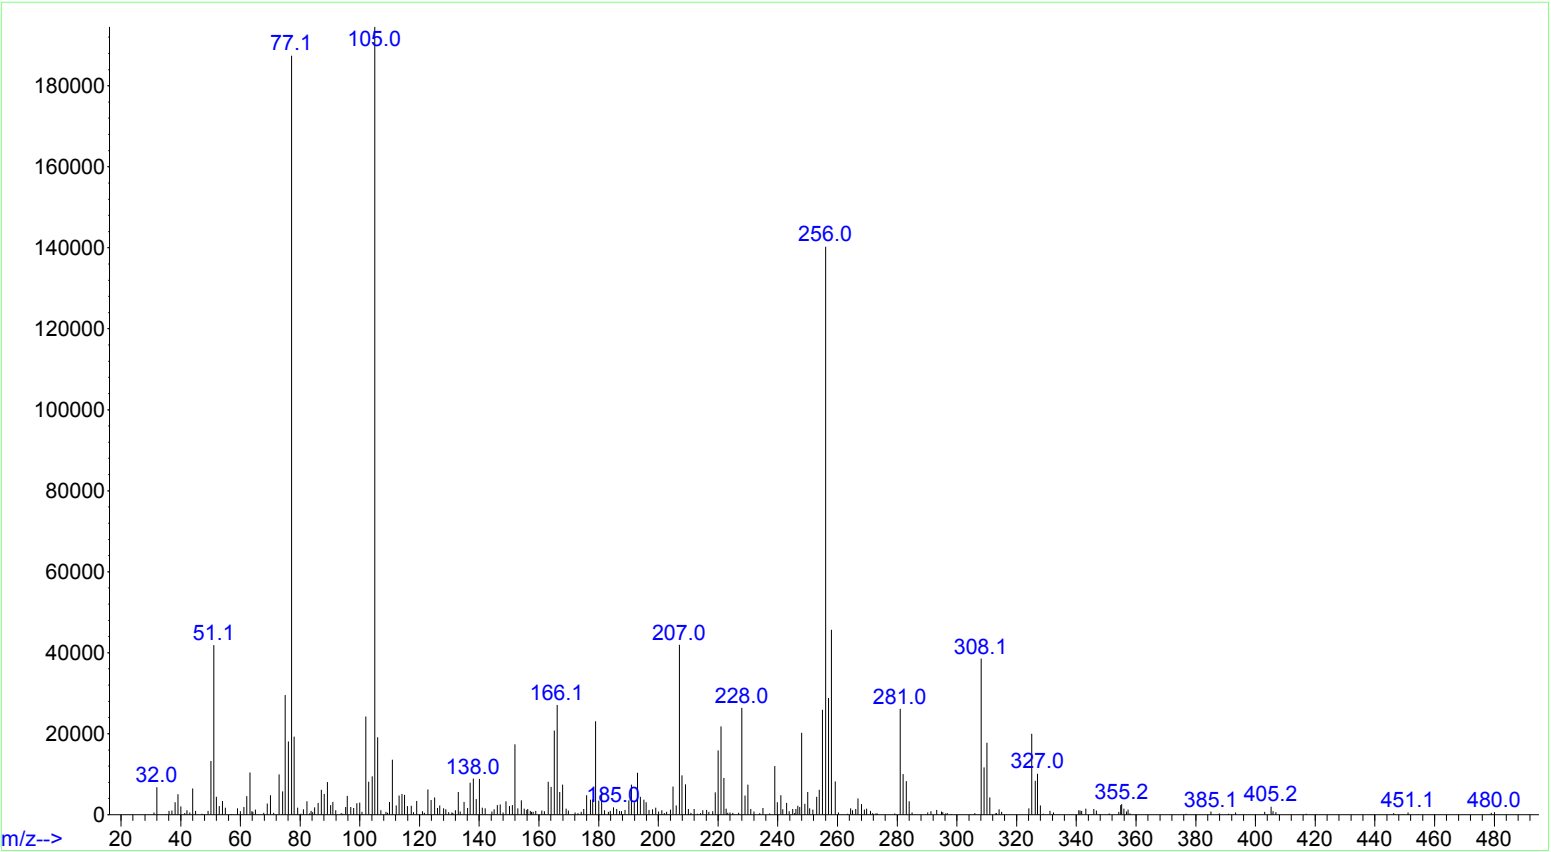

3c

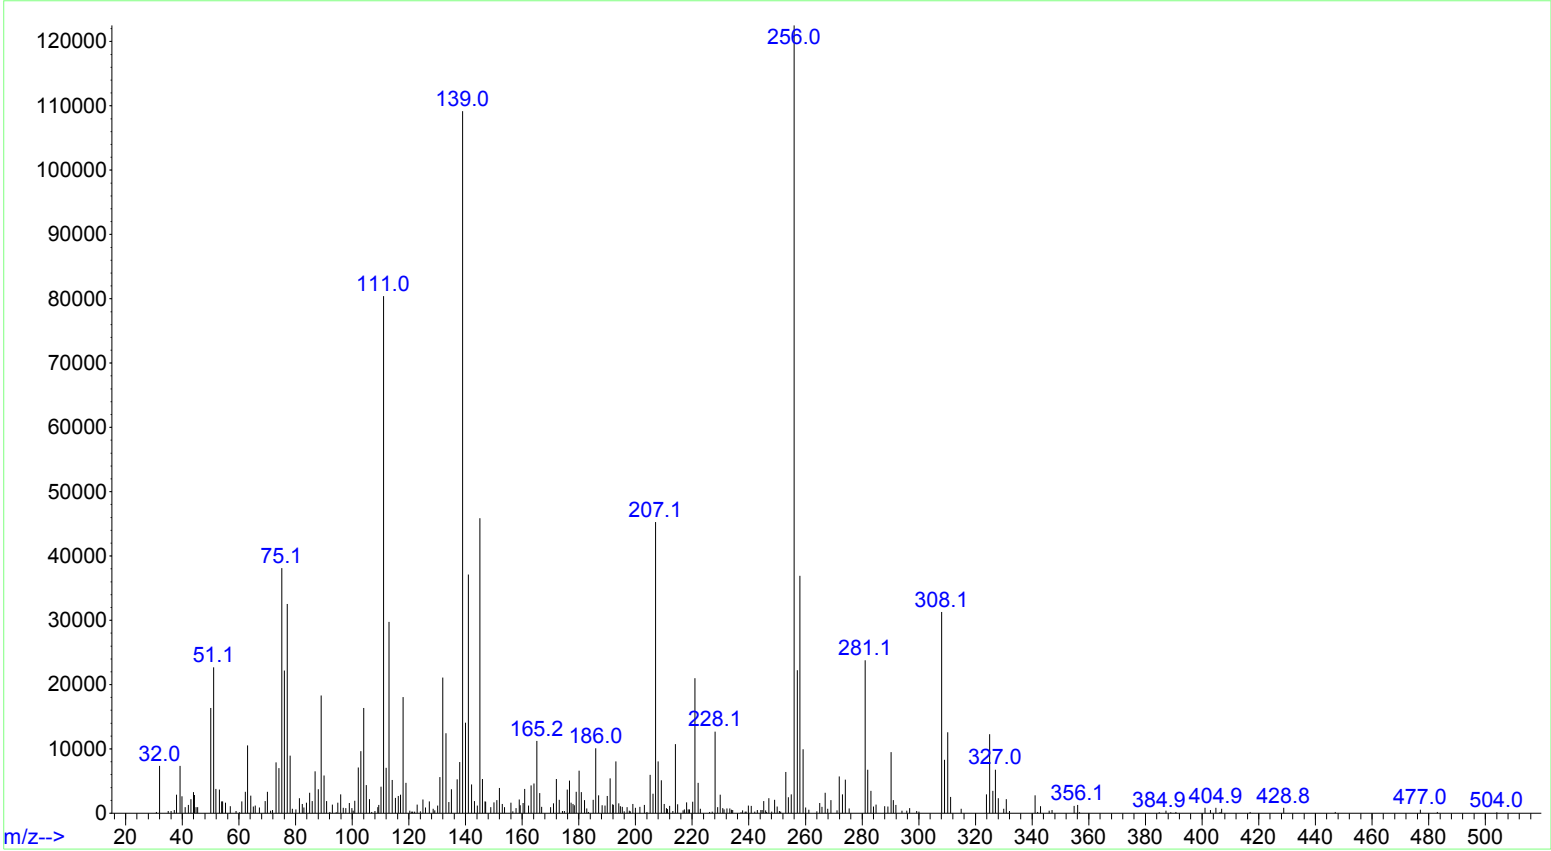

3d

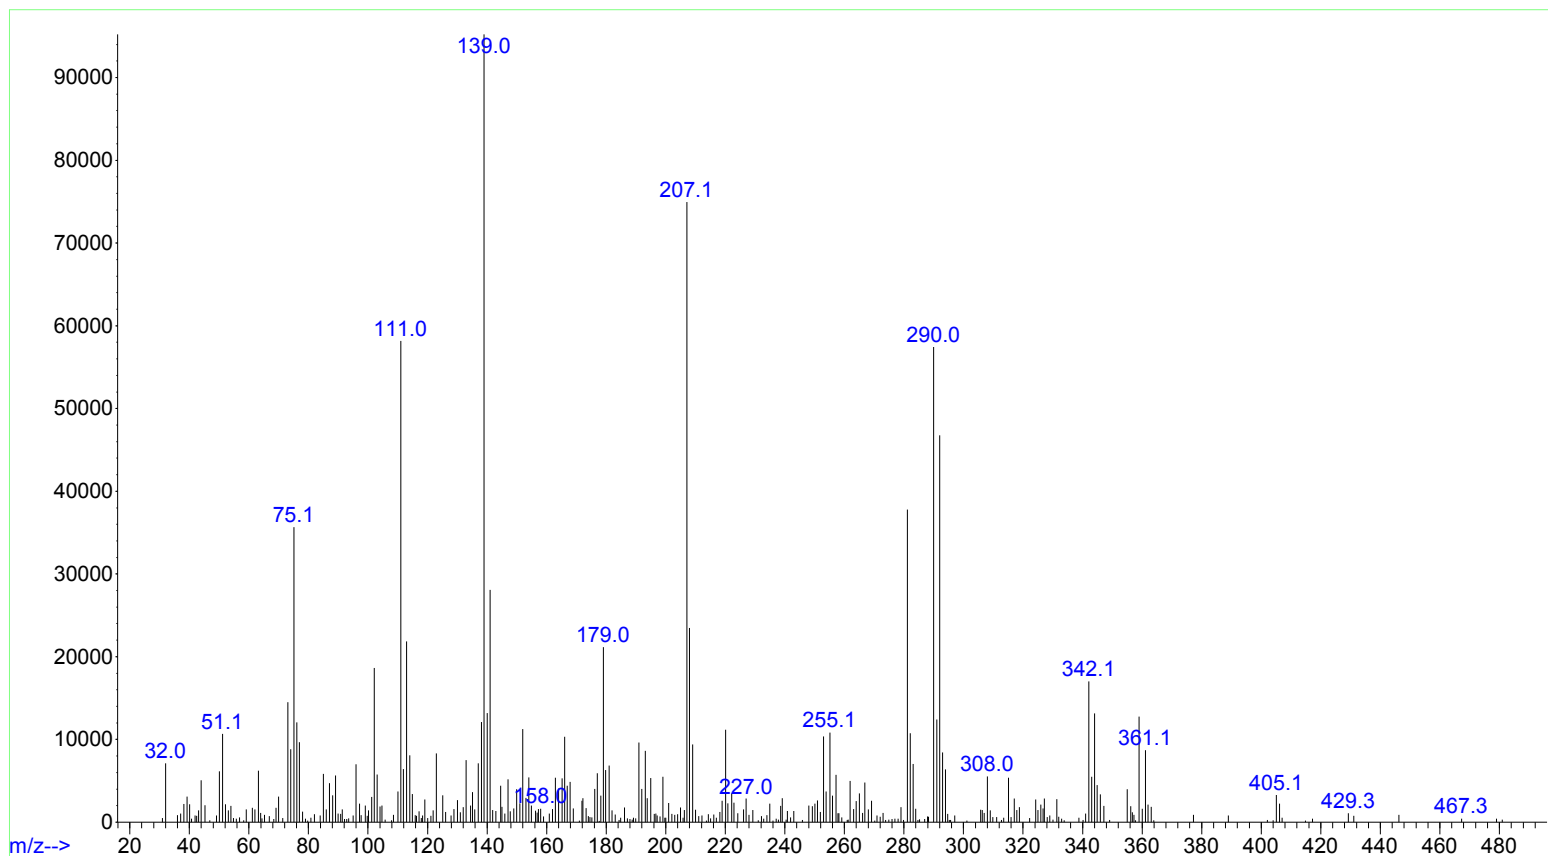



3e

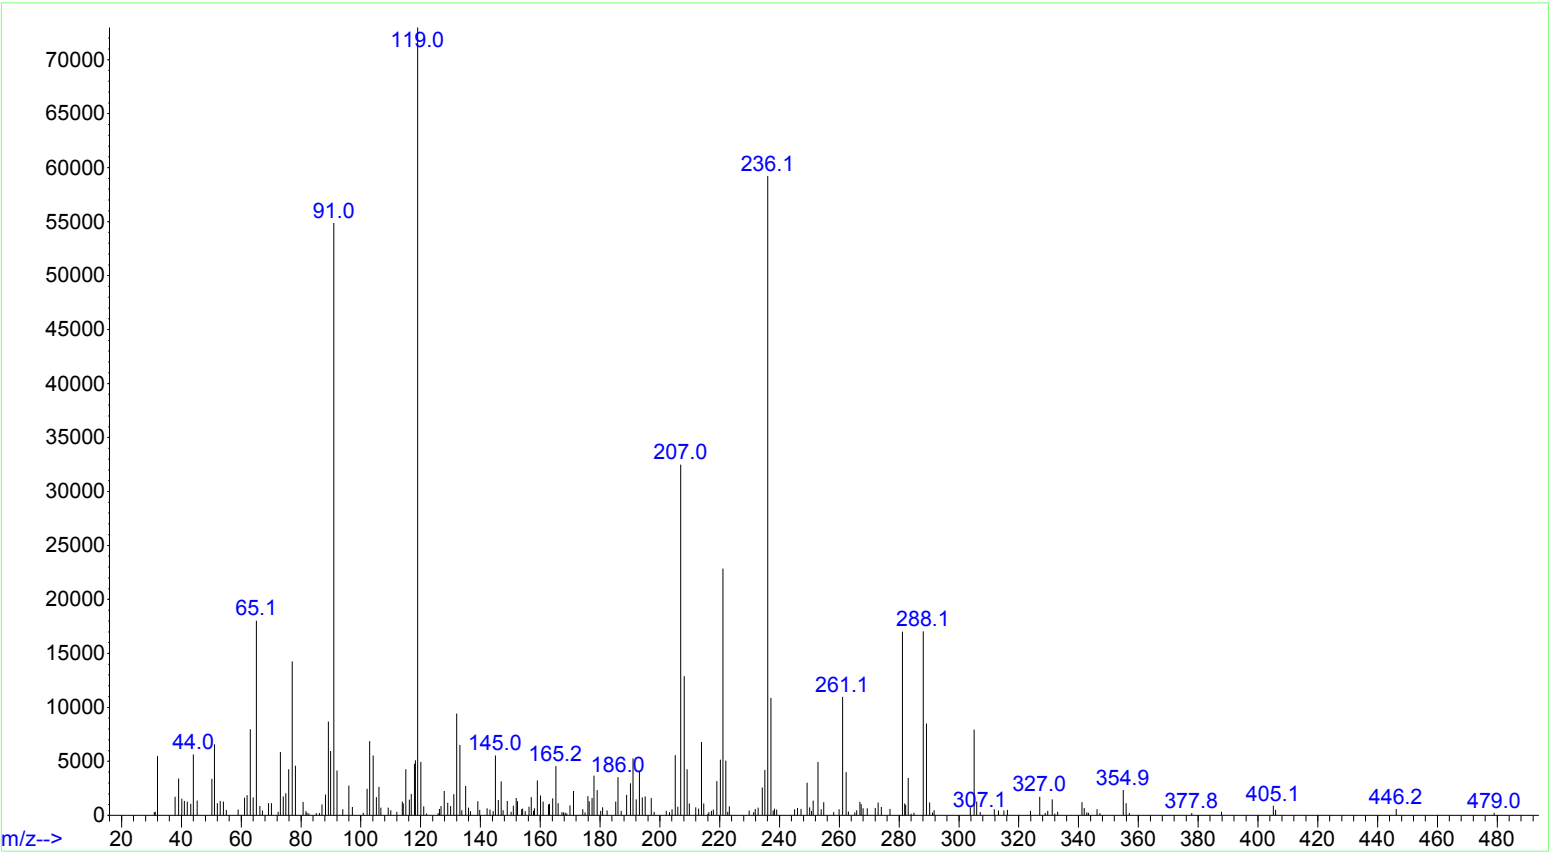

3j

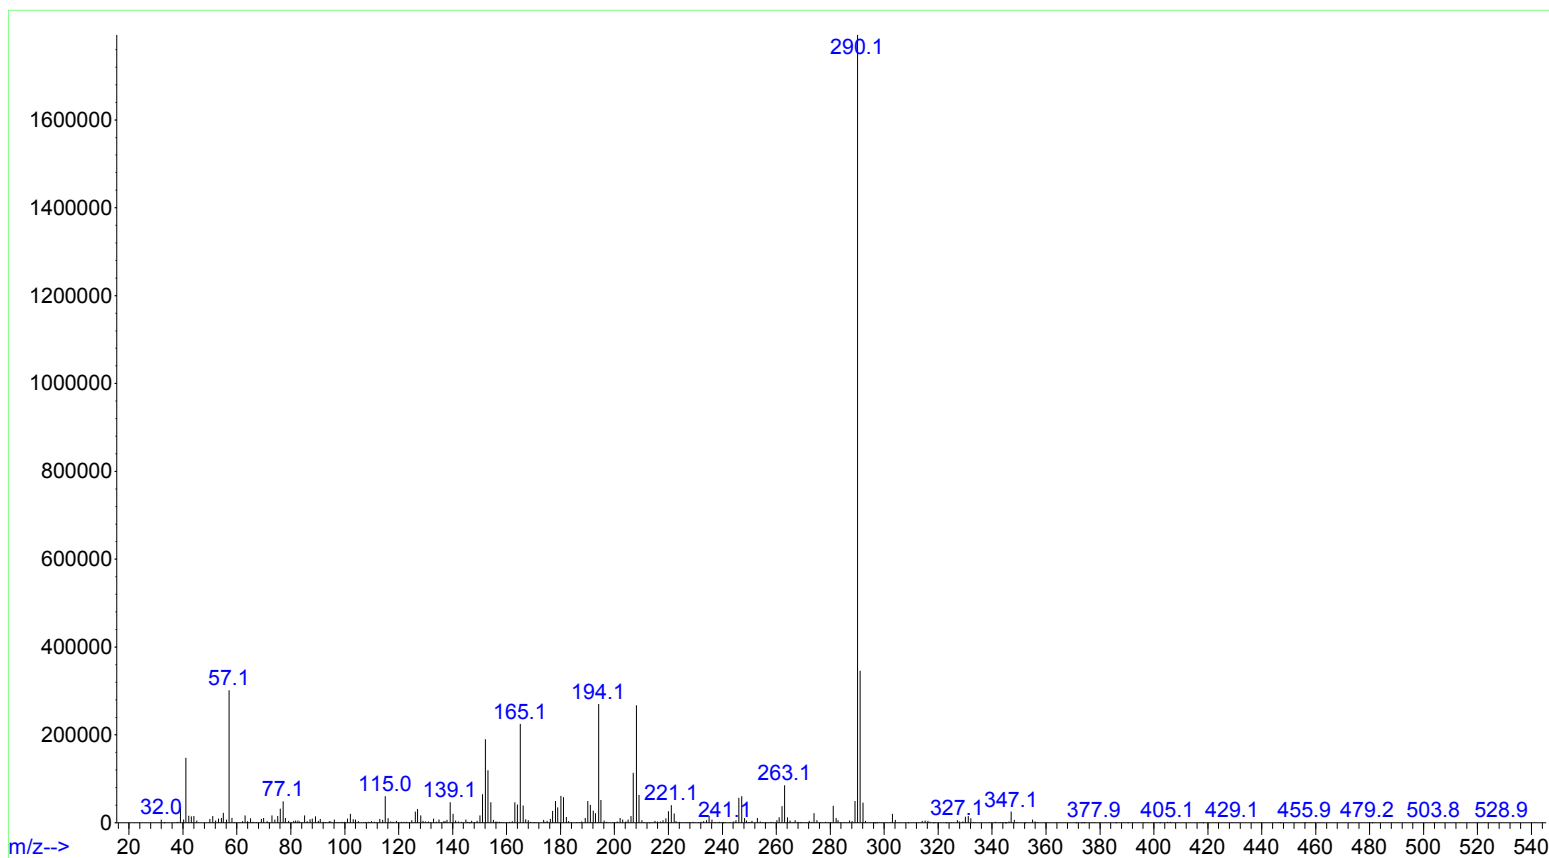

3k

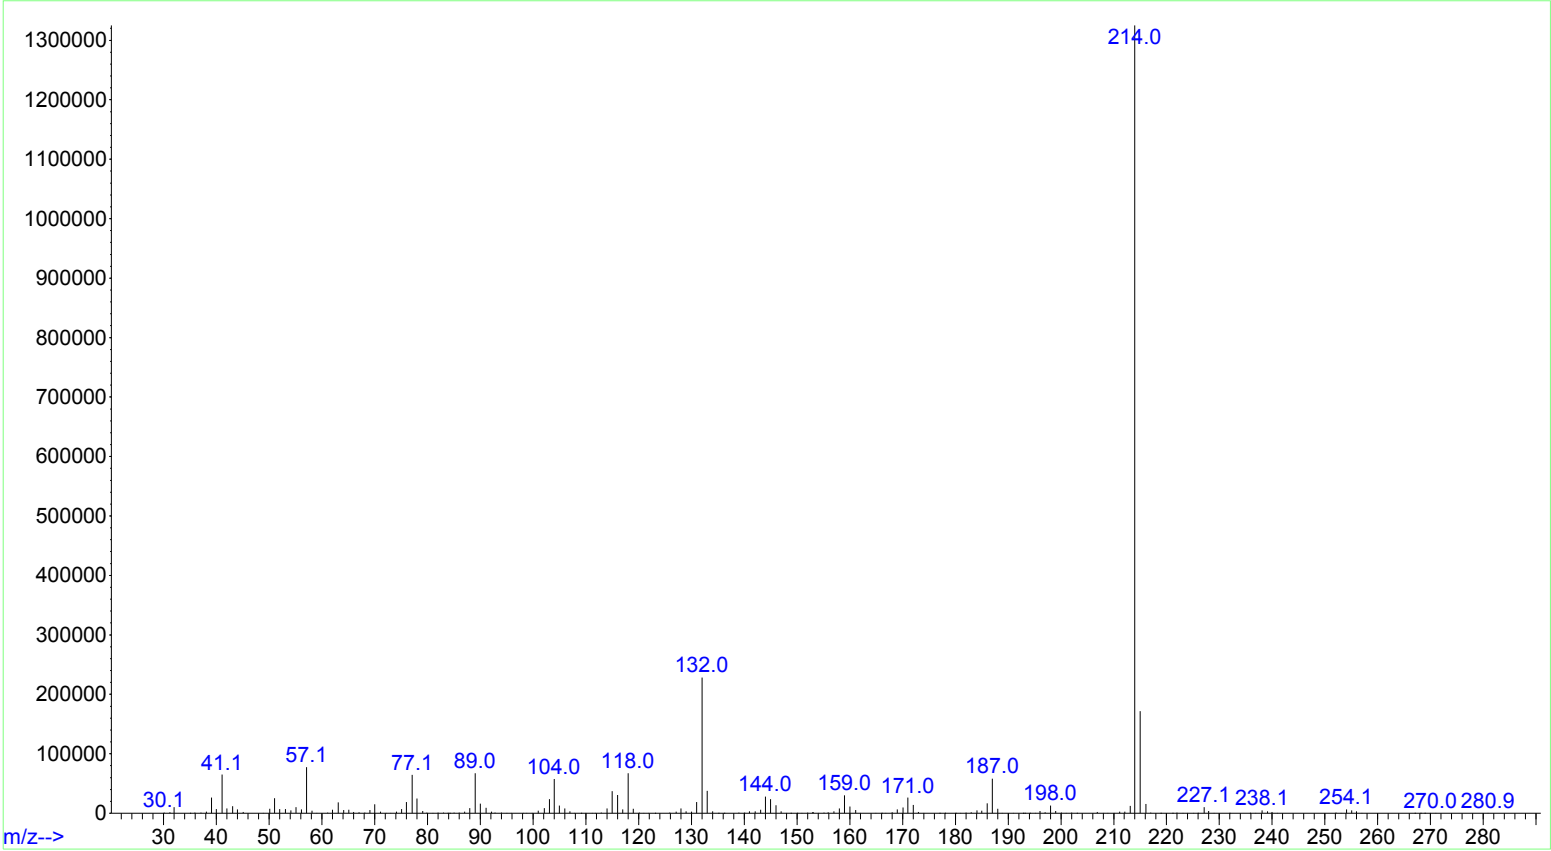

3L

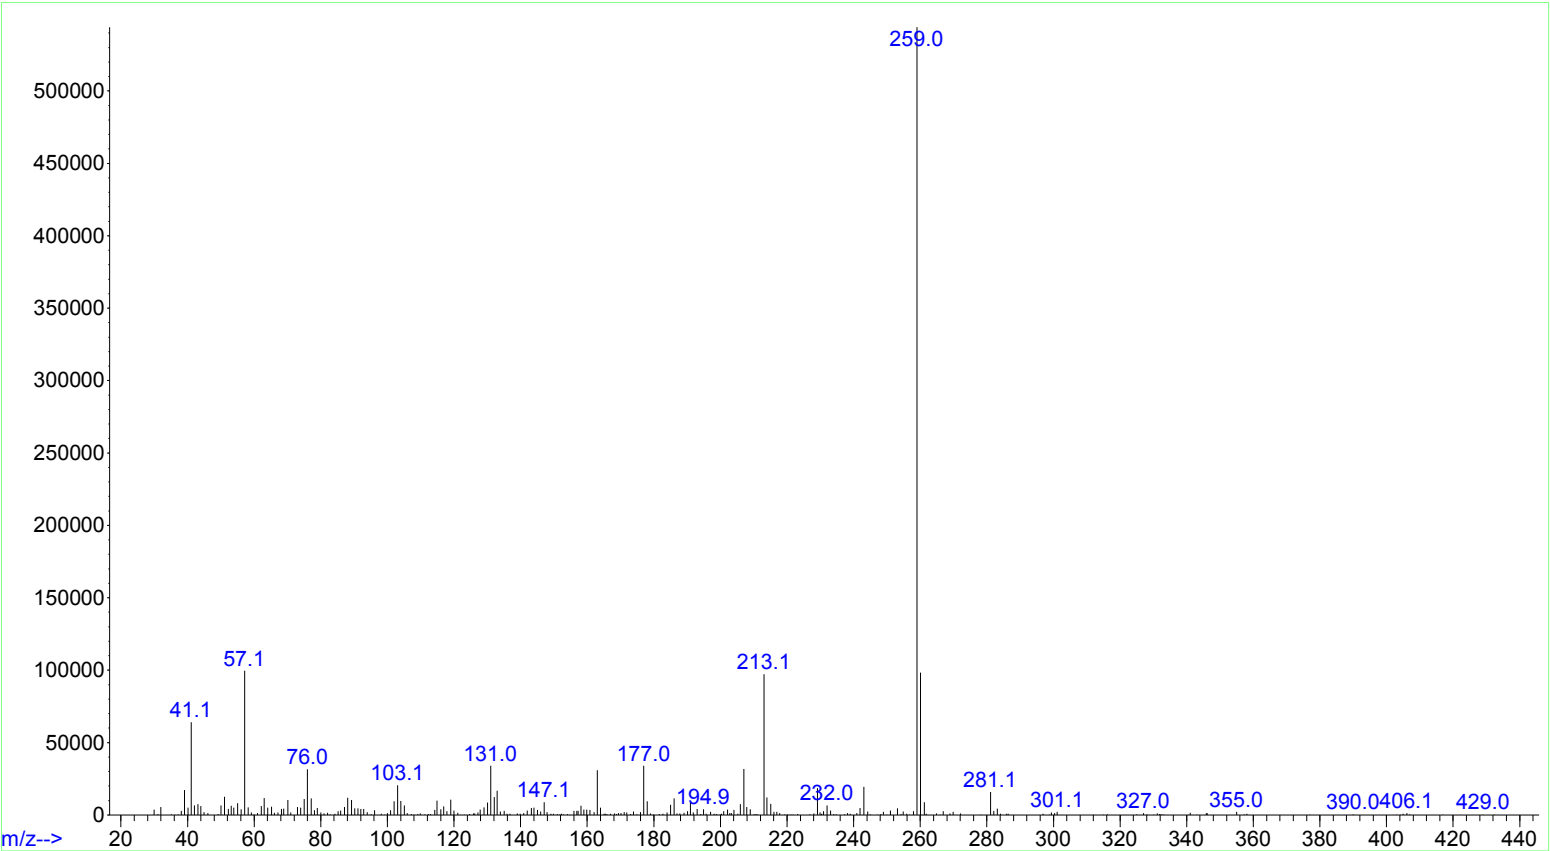

3m

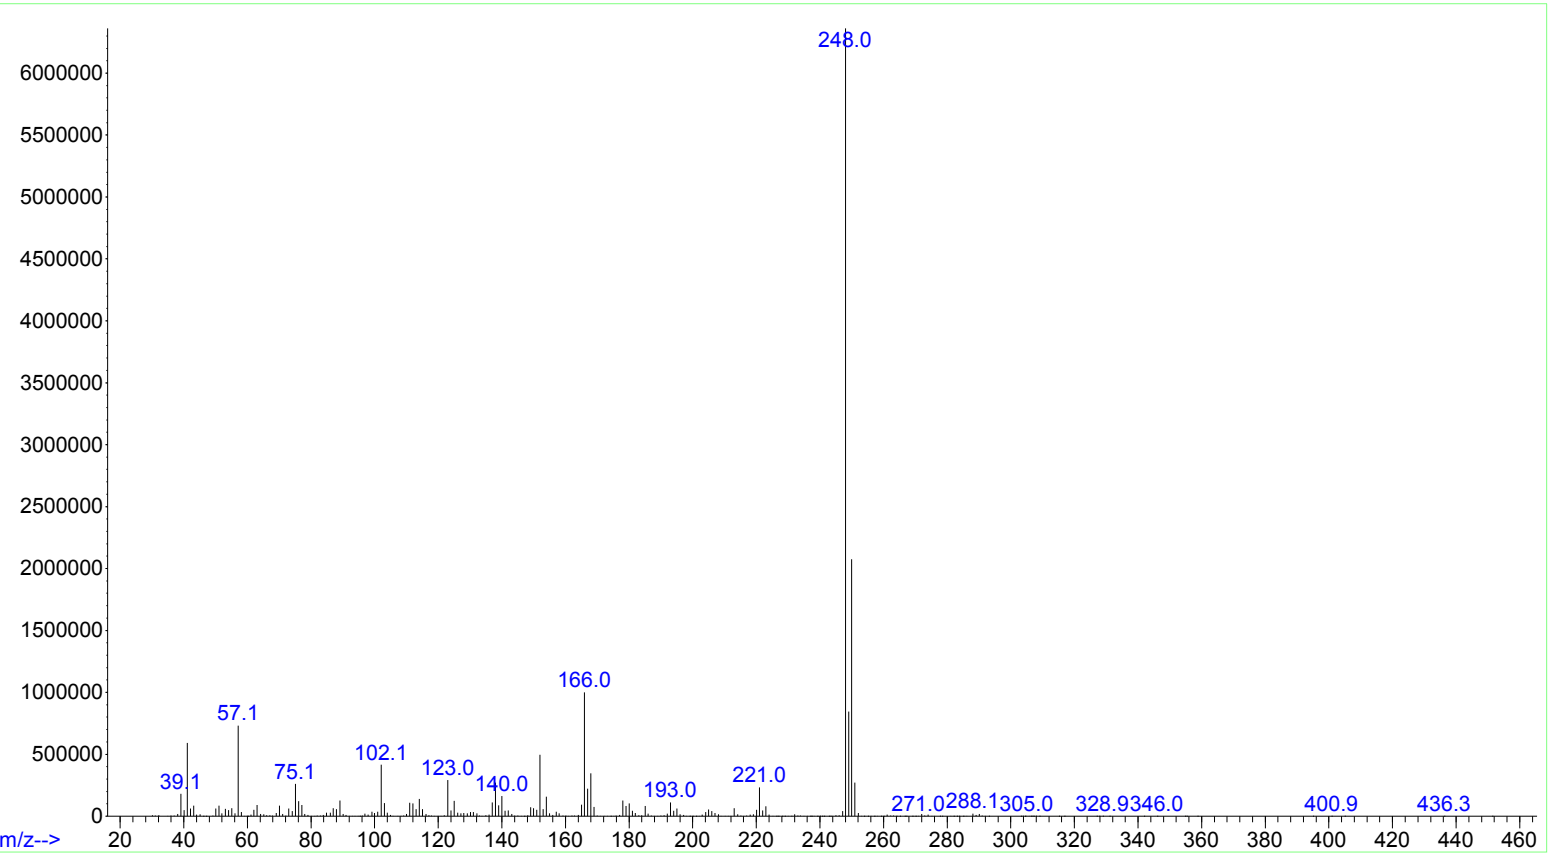

3N

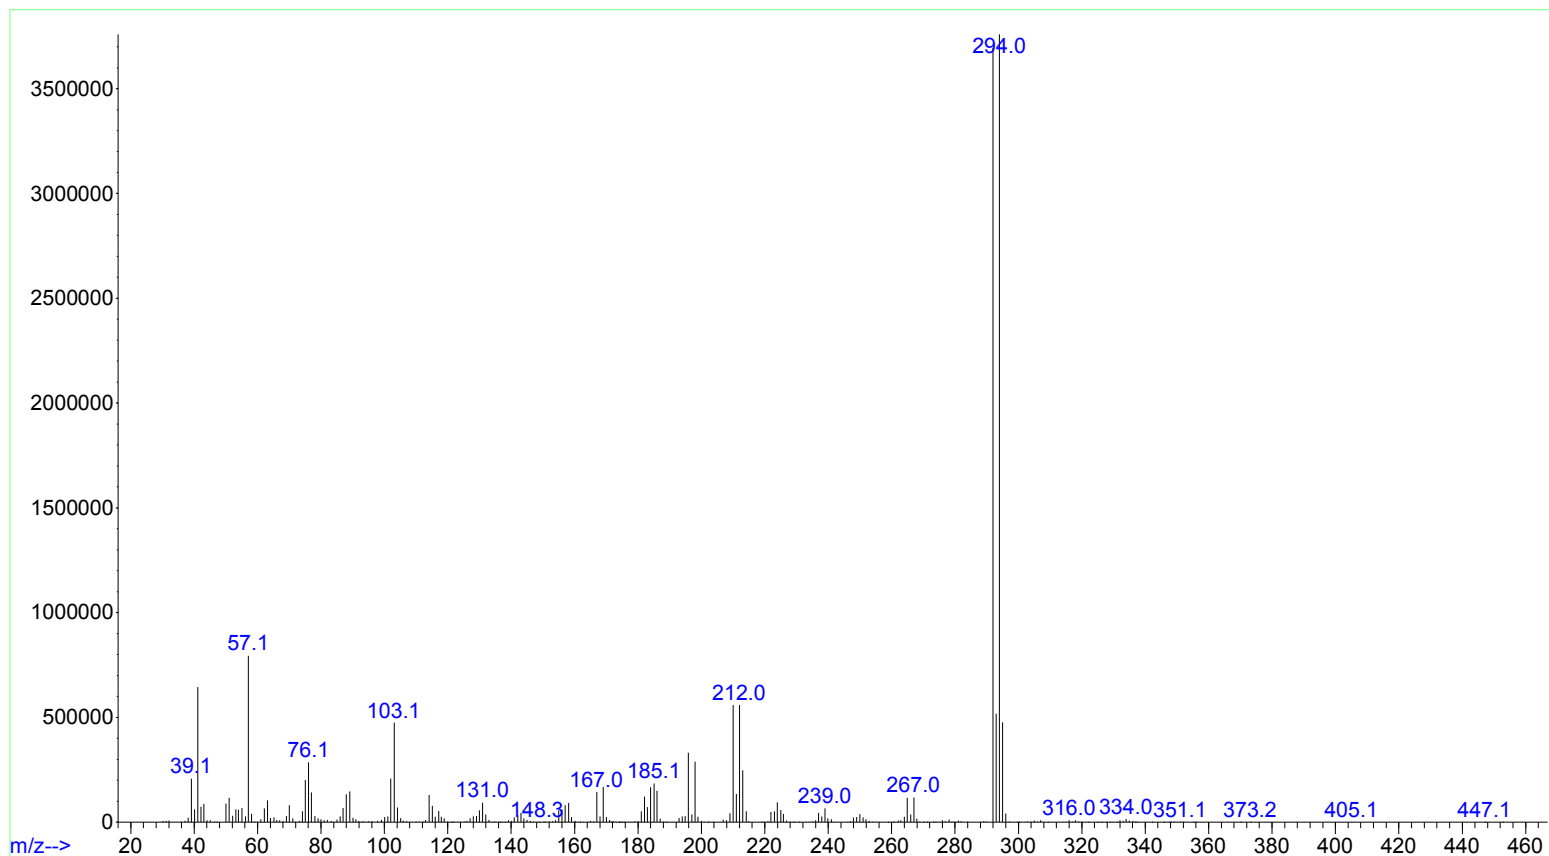

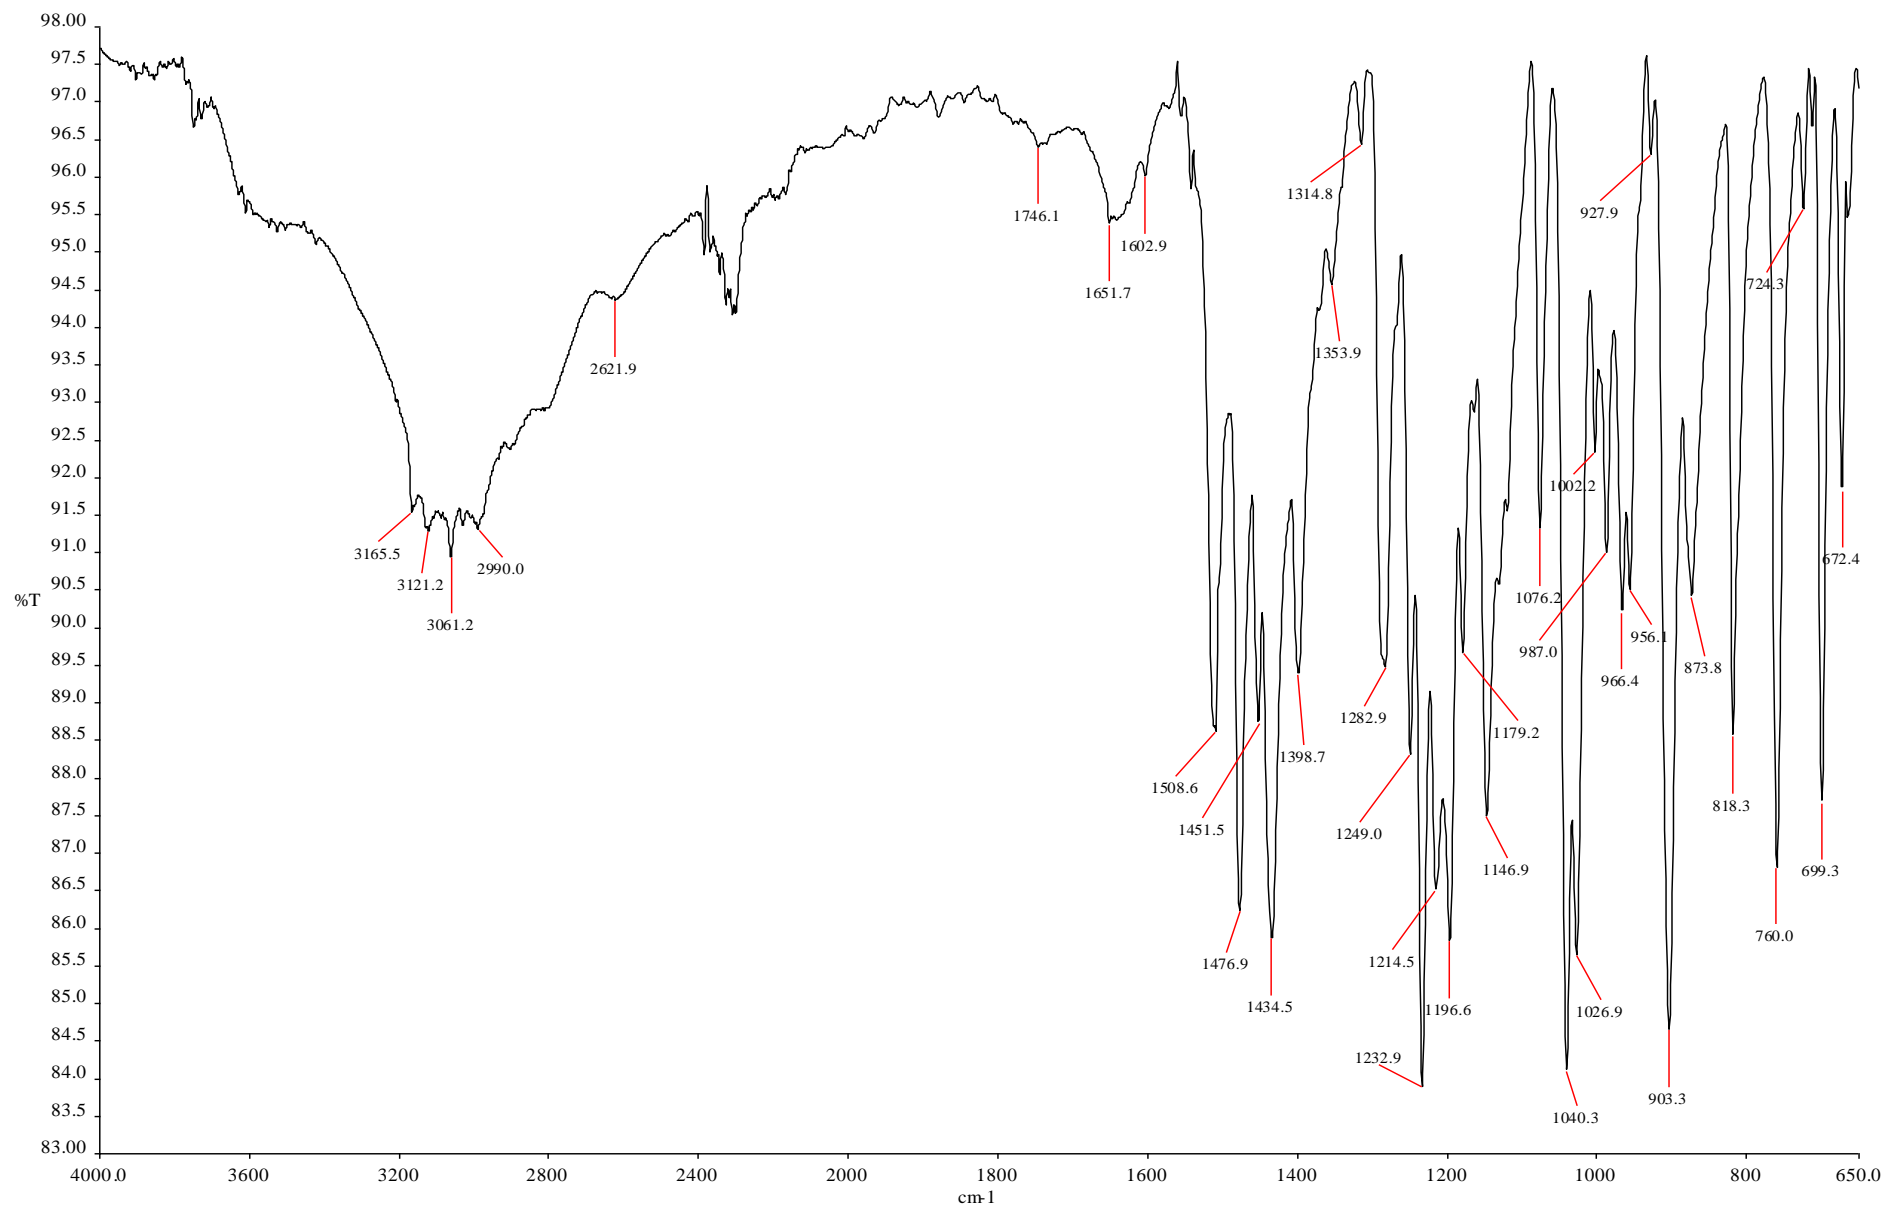

3a

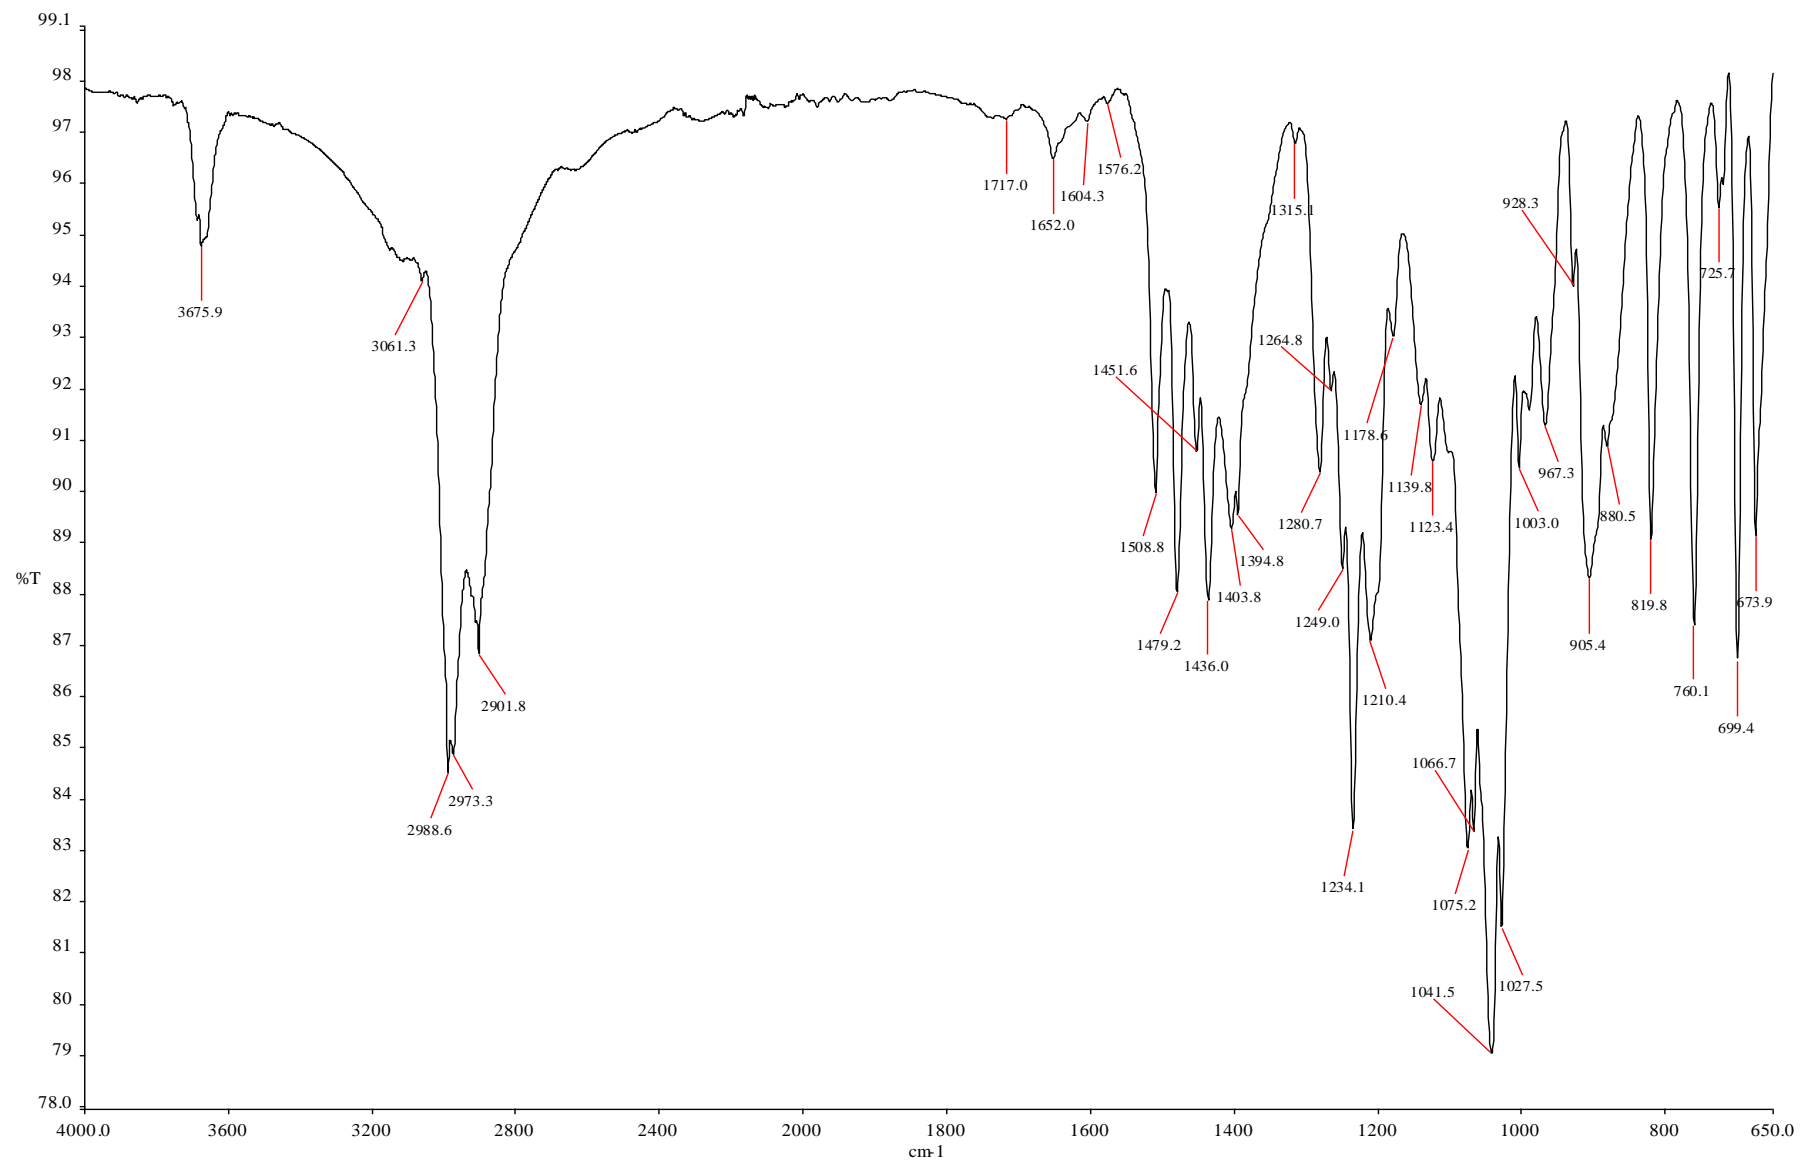



**3b**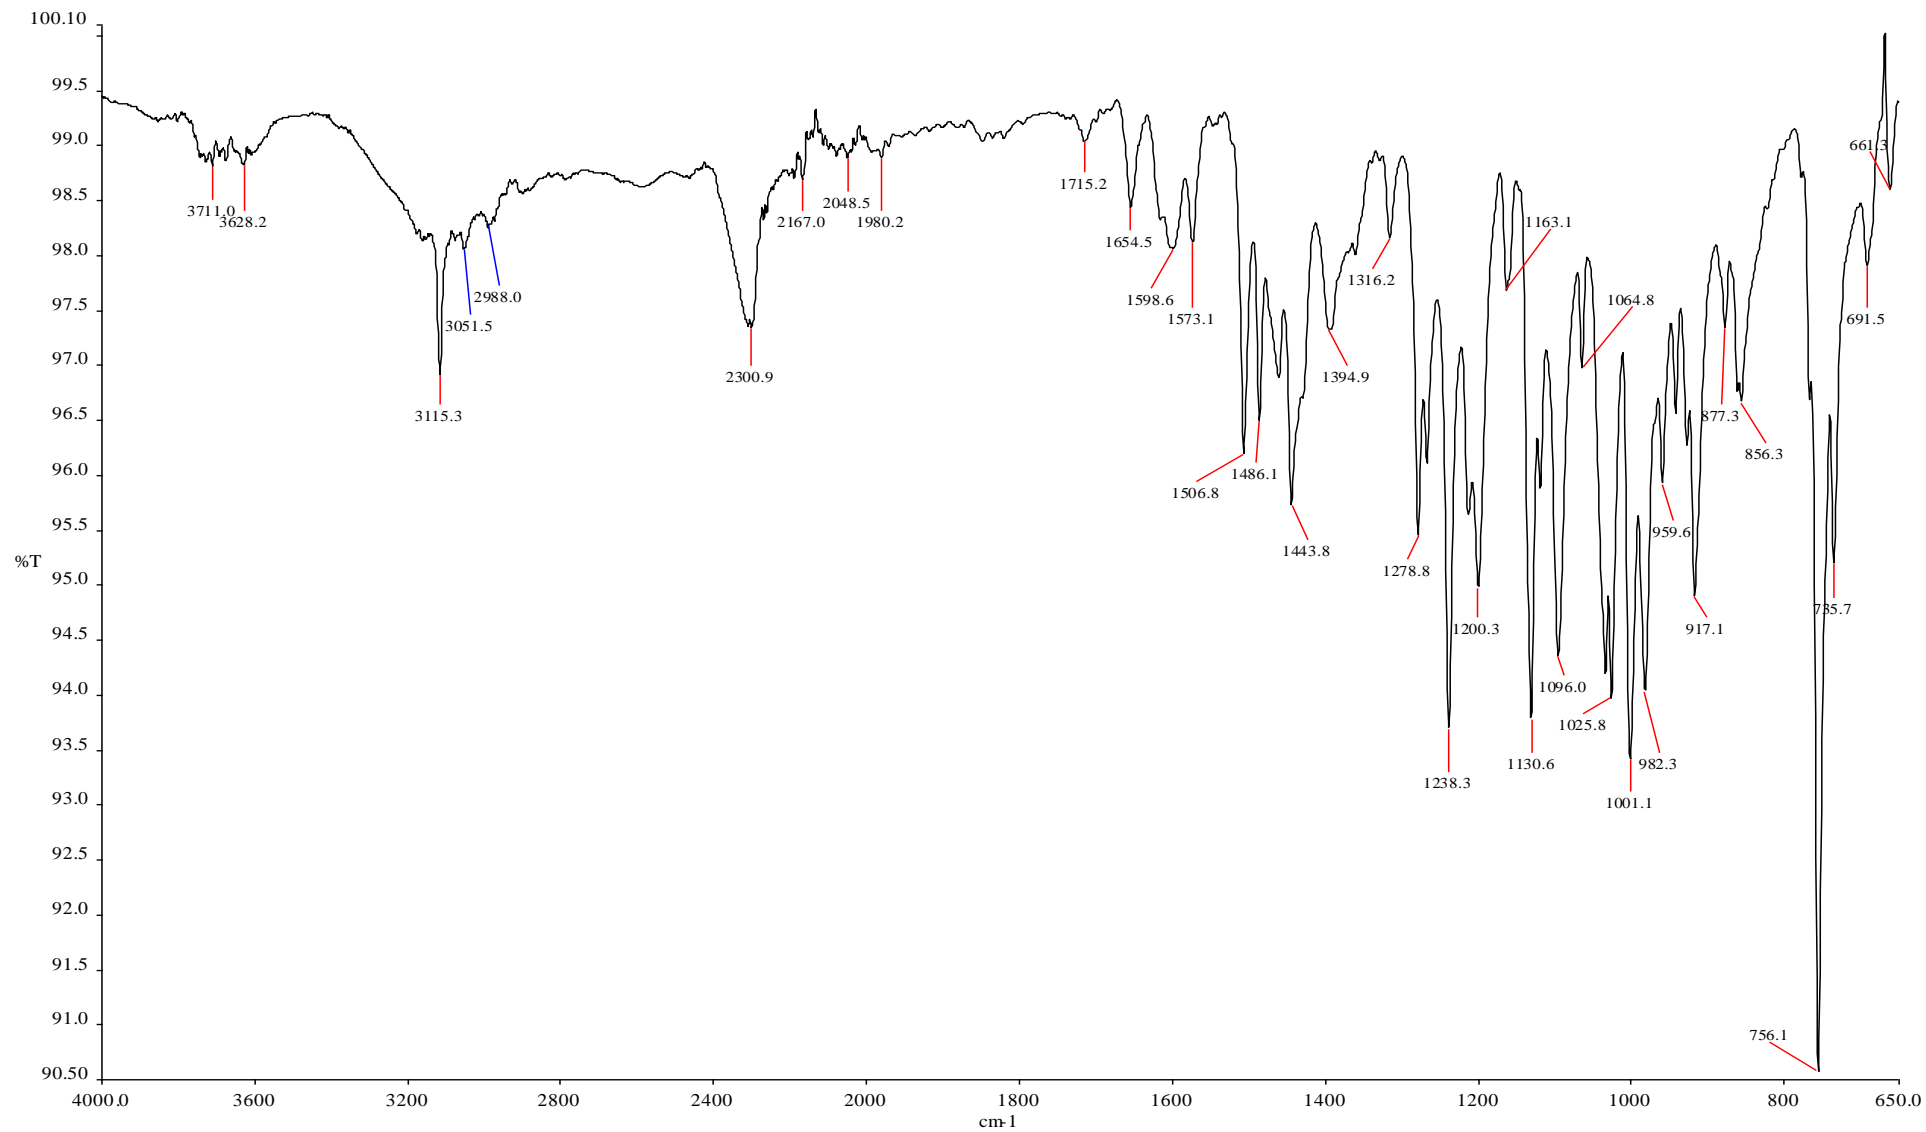**3c**

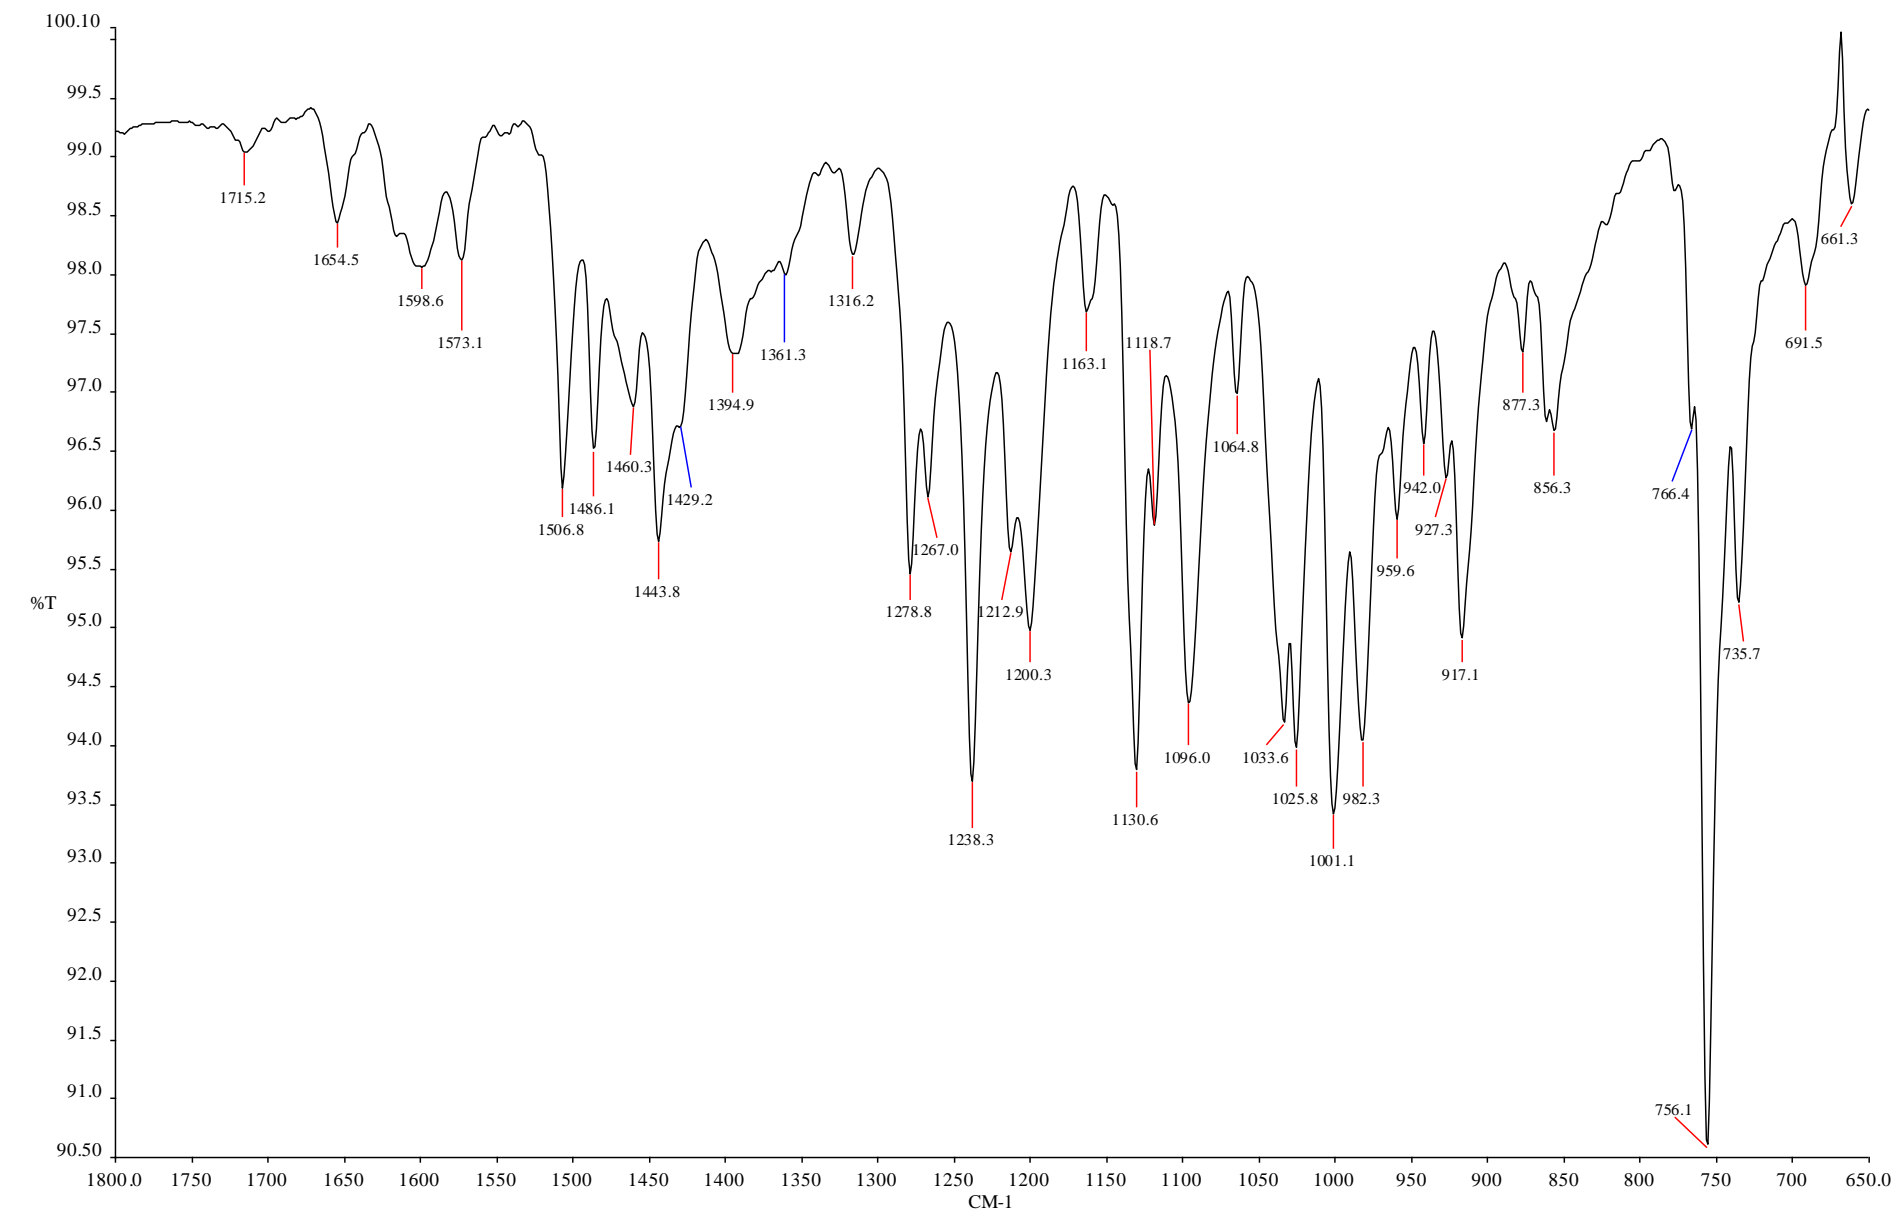

3c

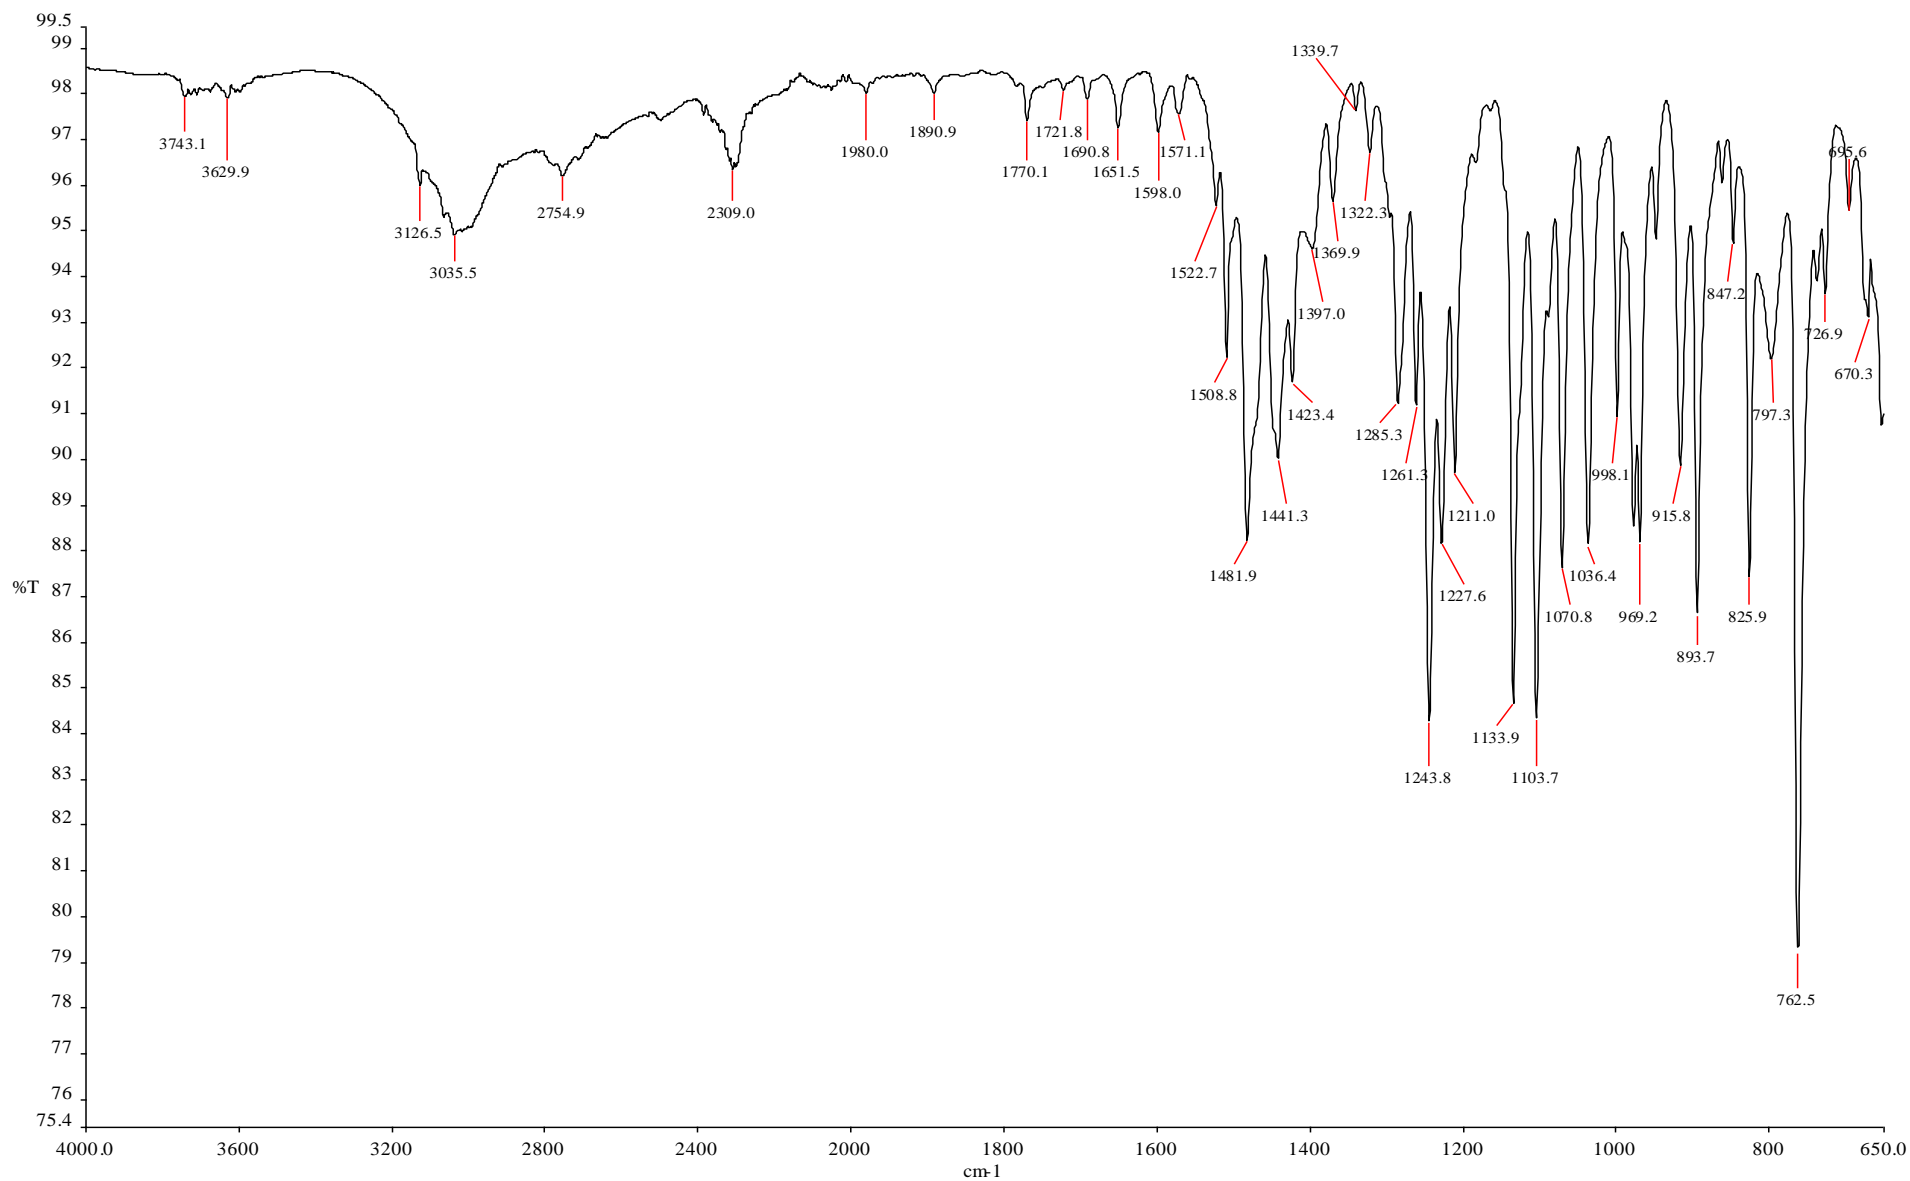

3d

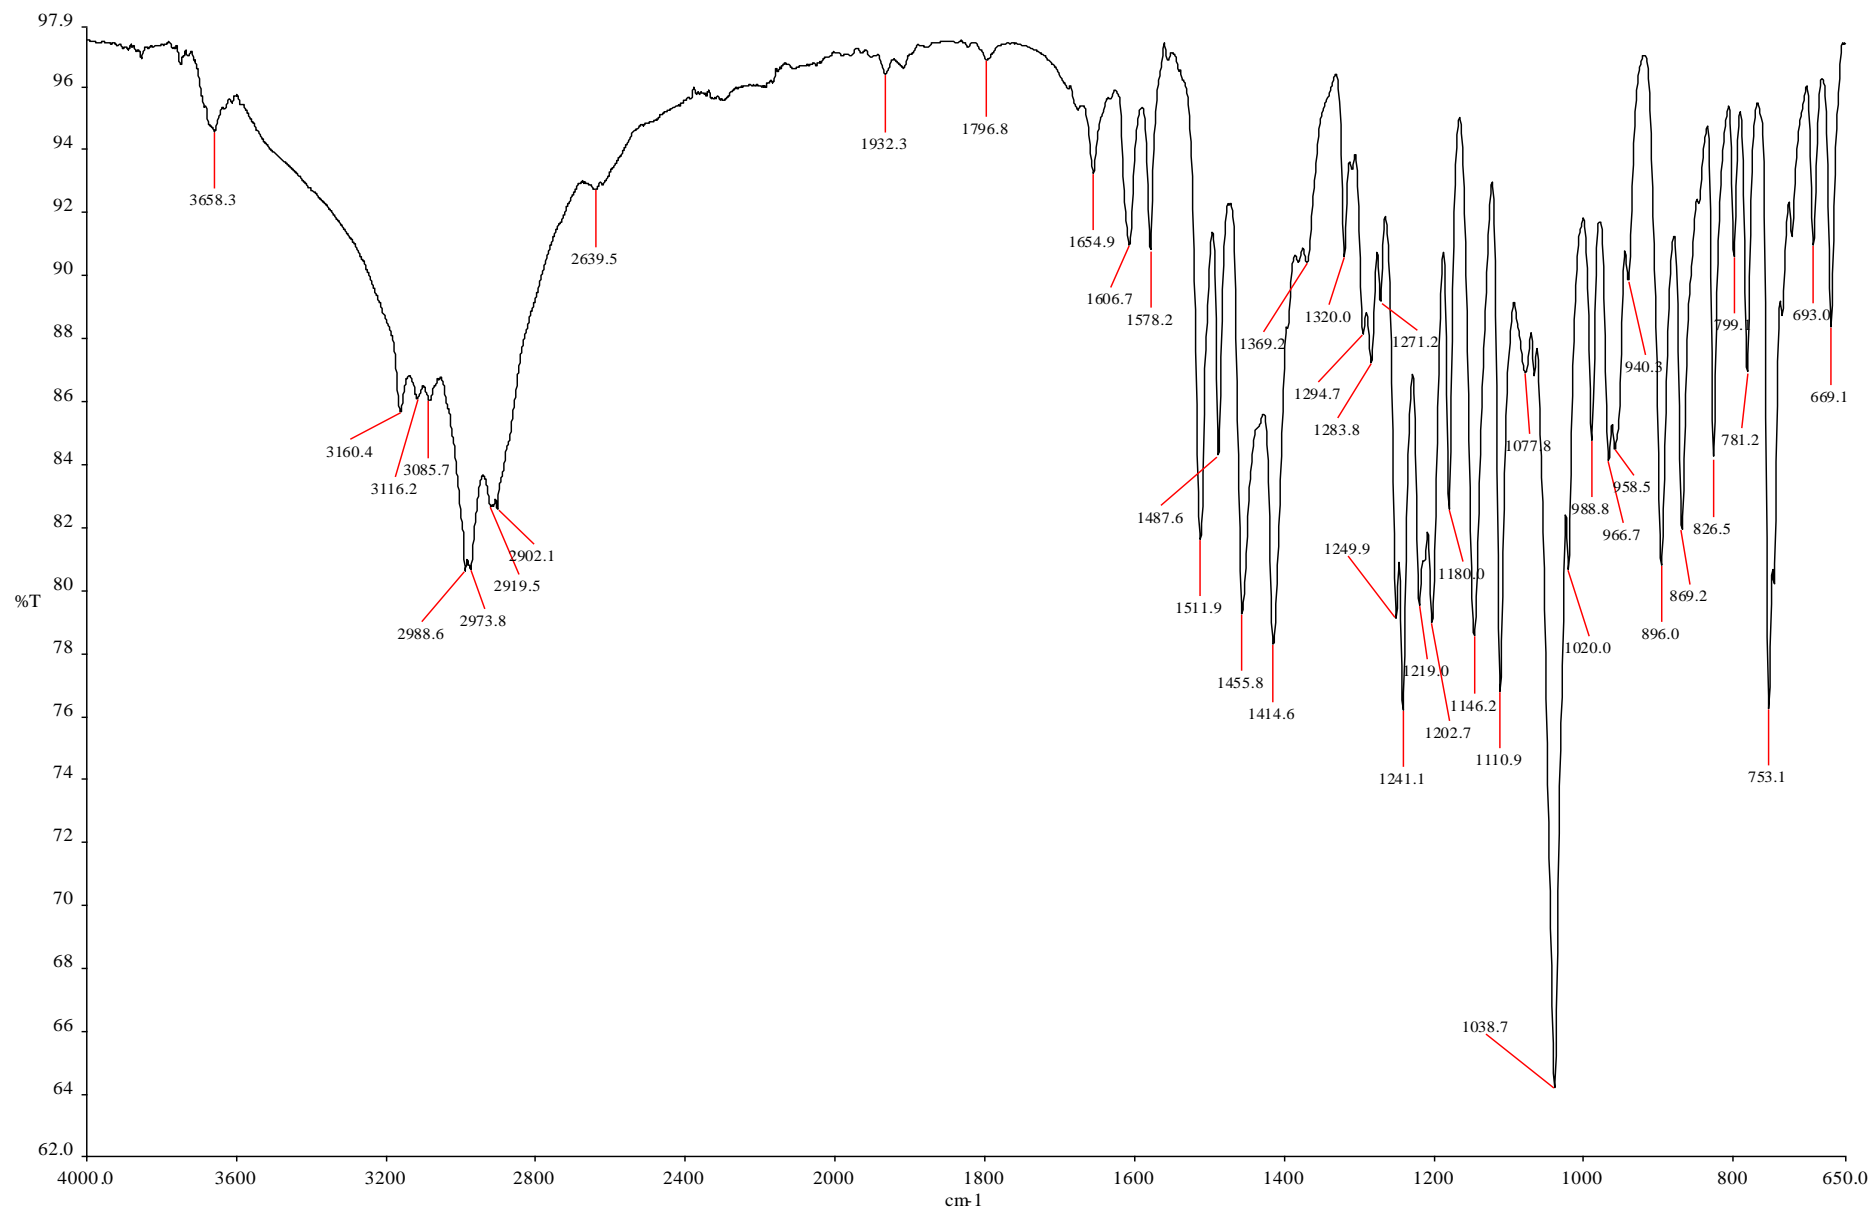

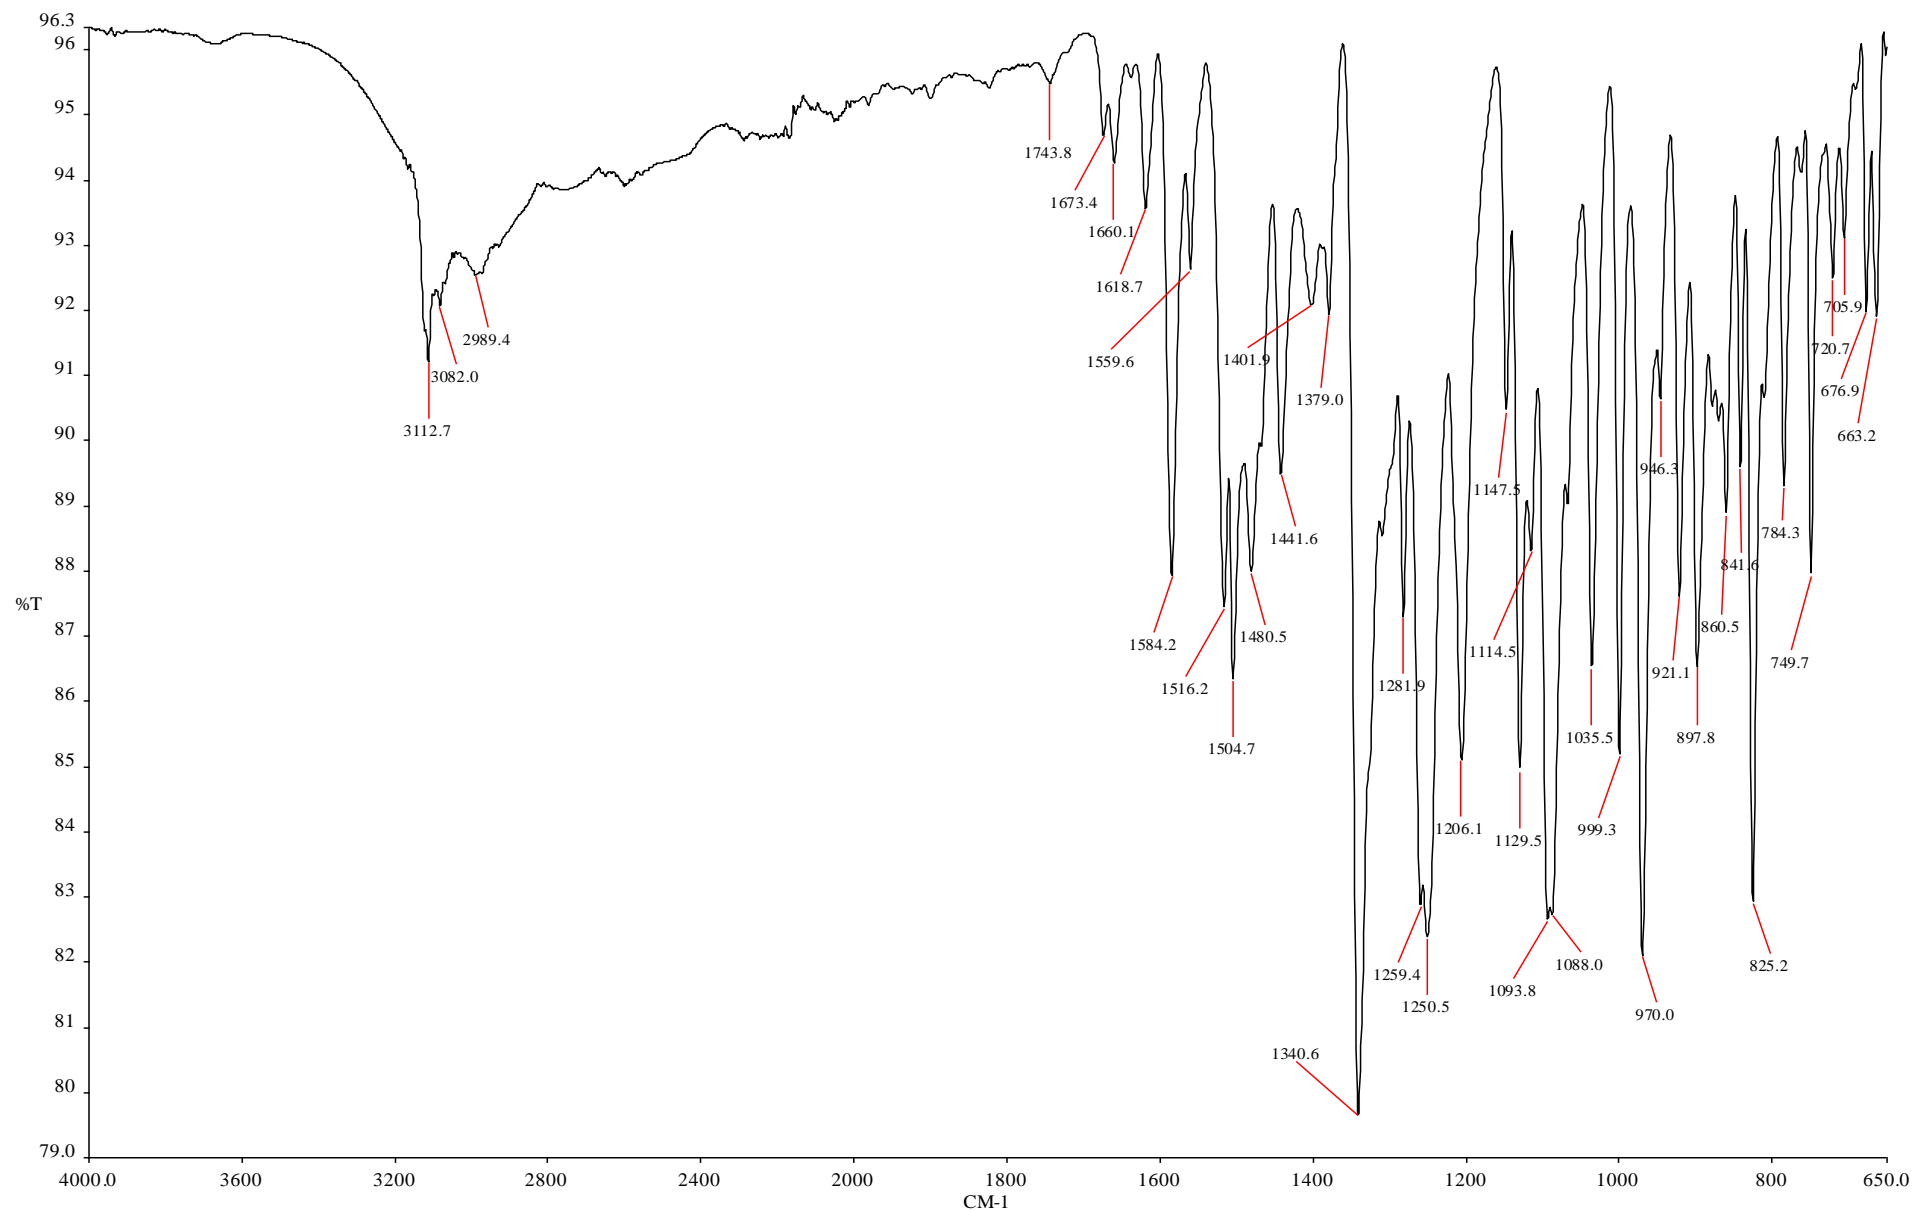

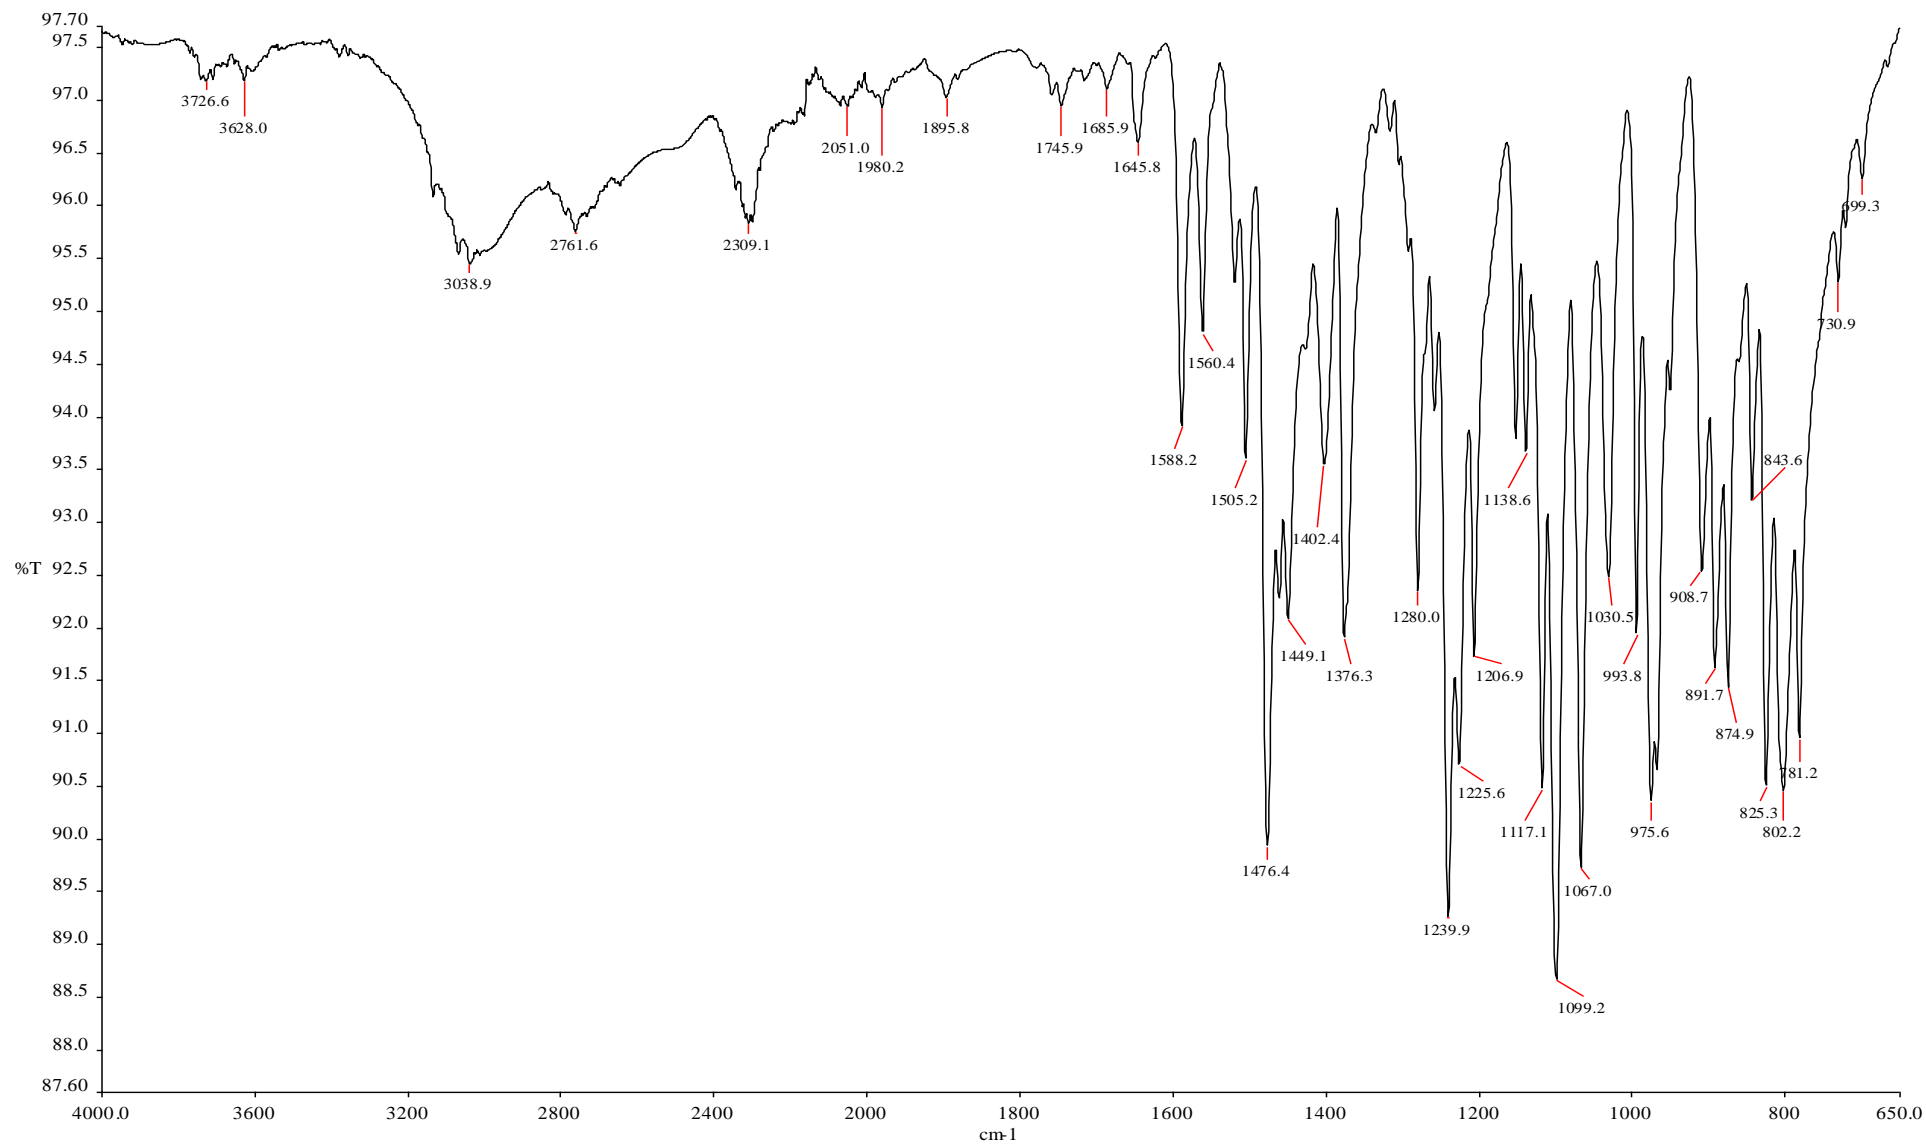

3g

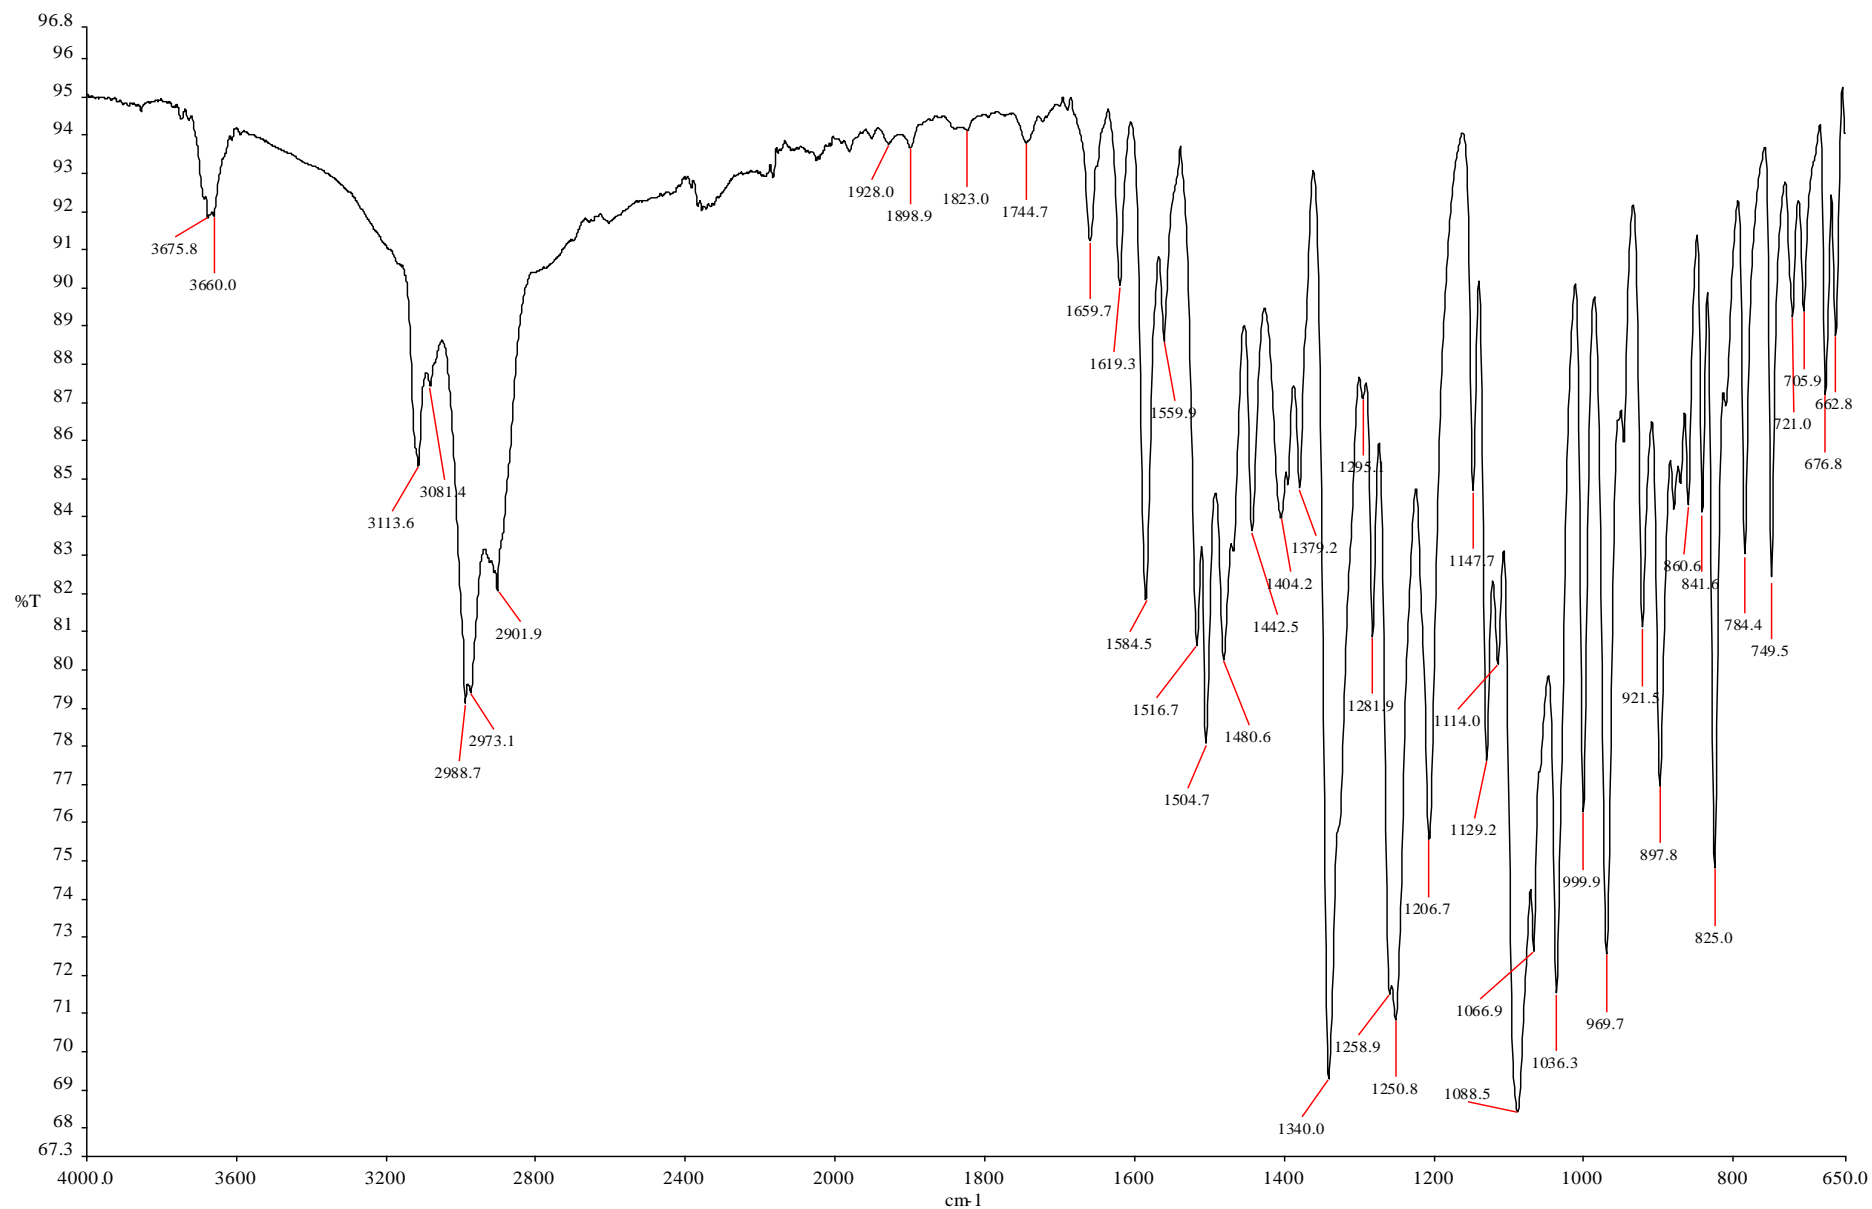

3h

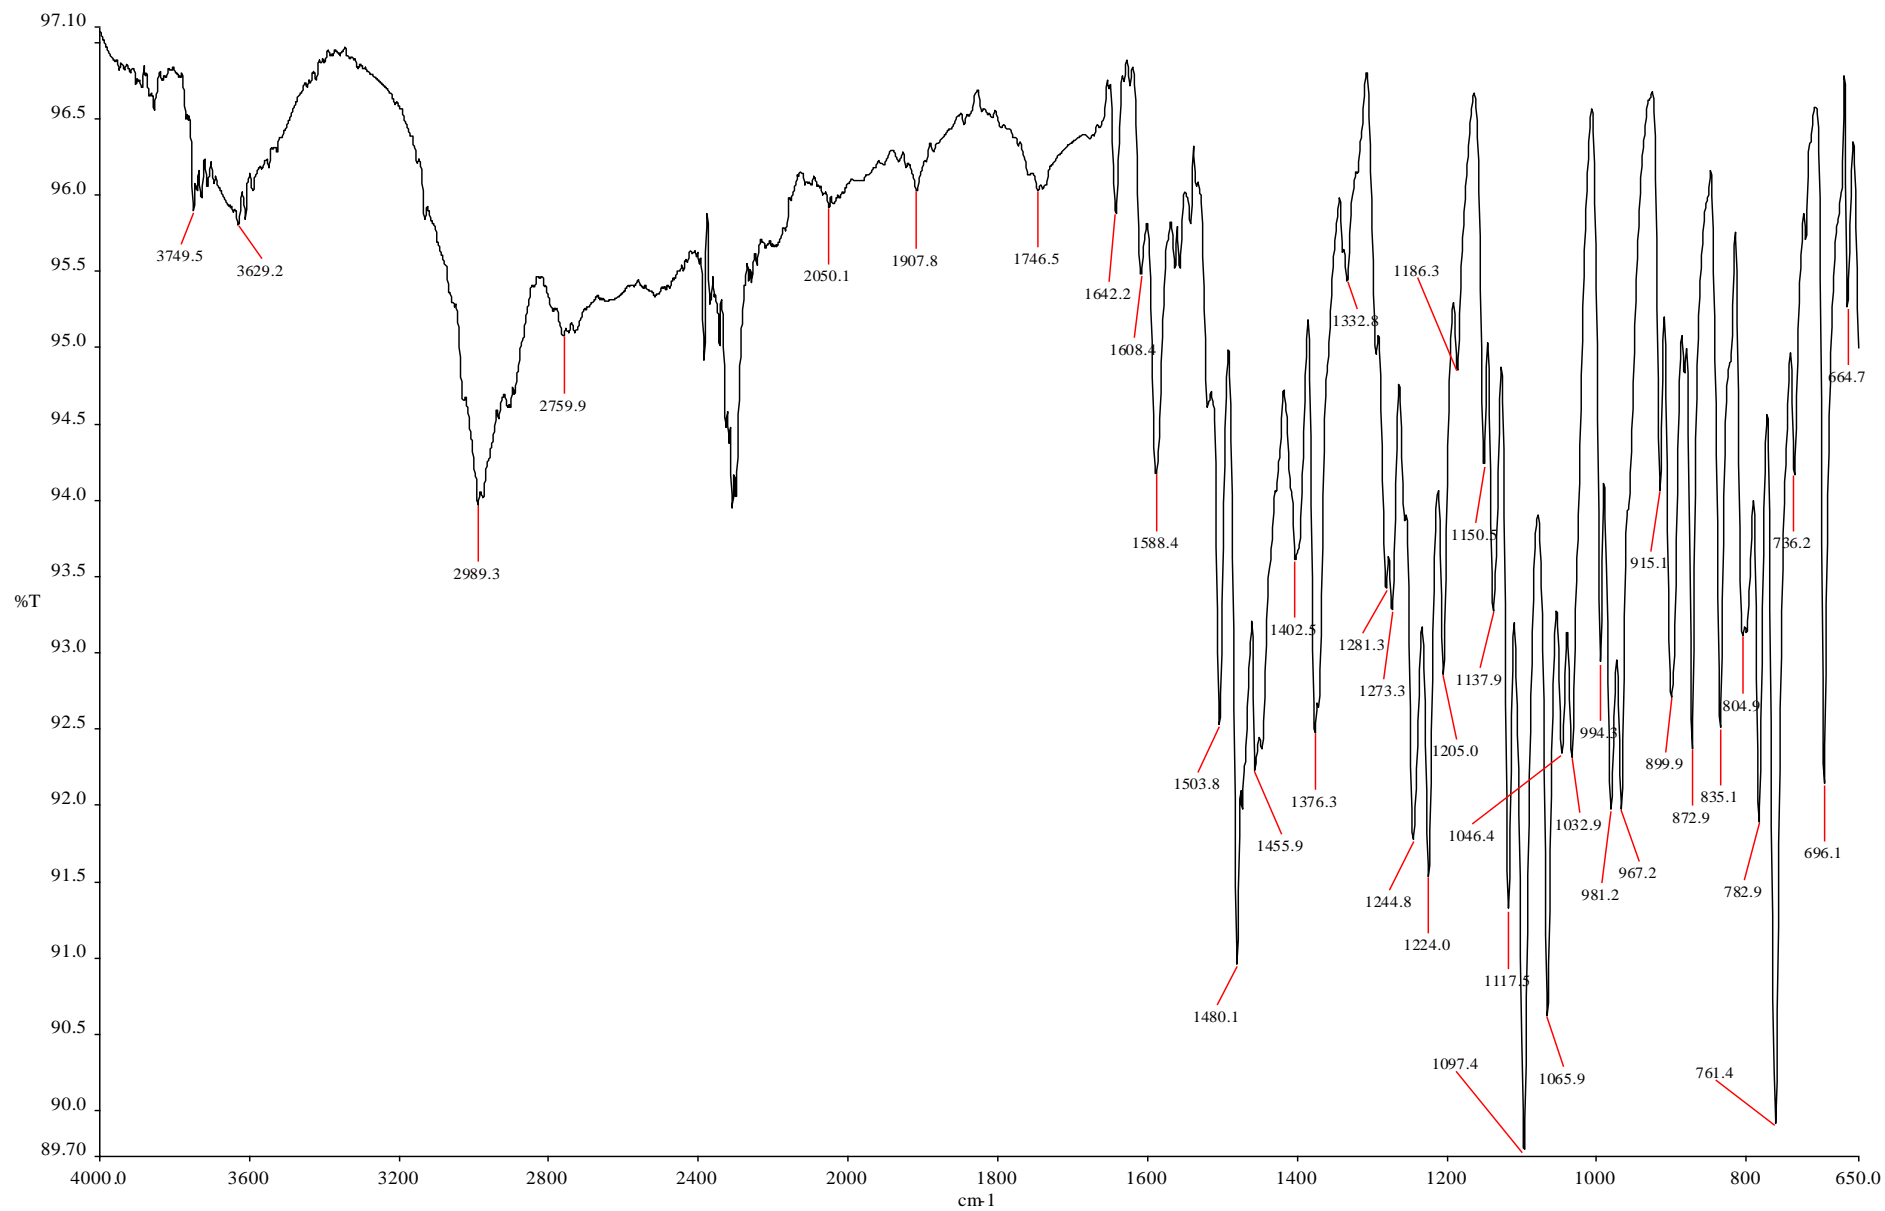



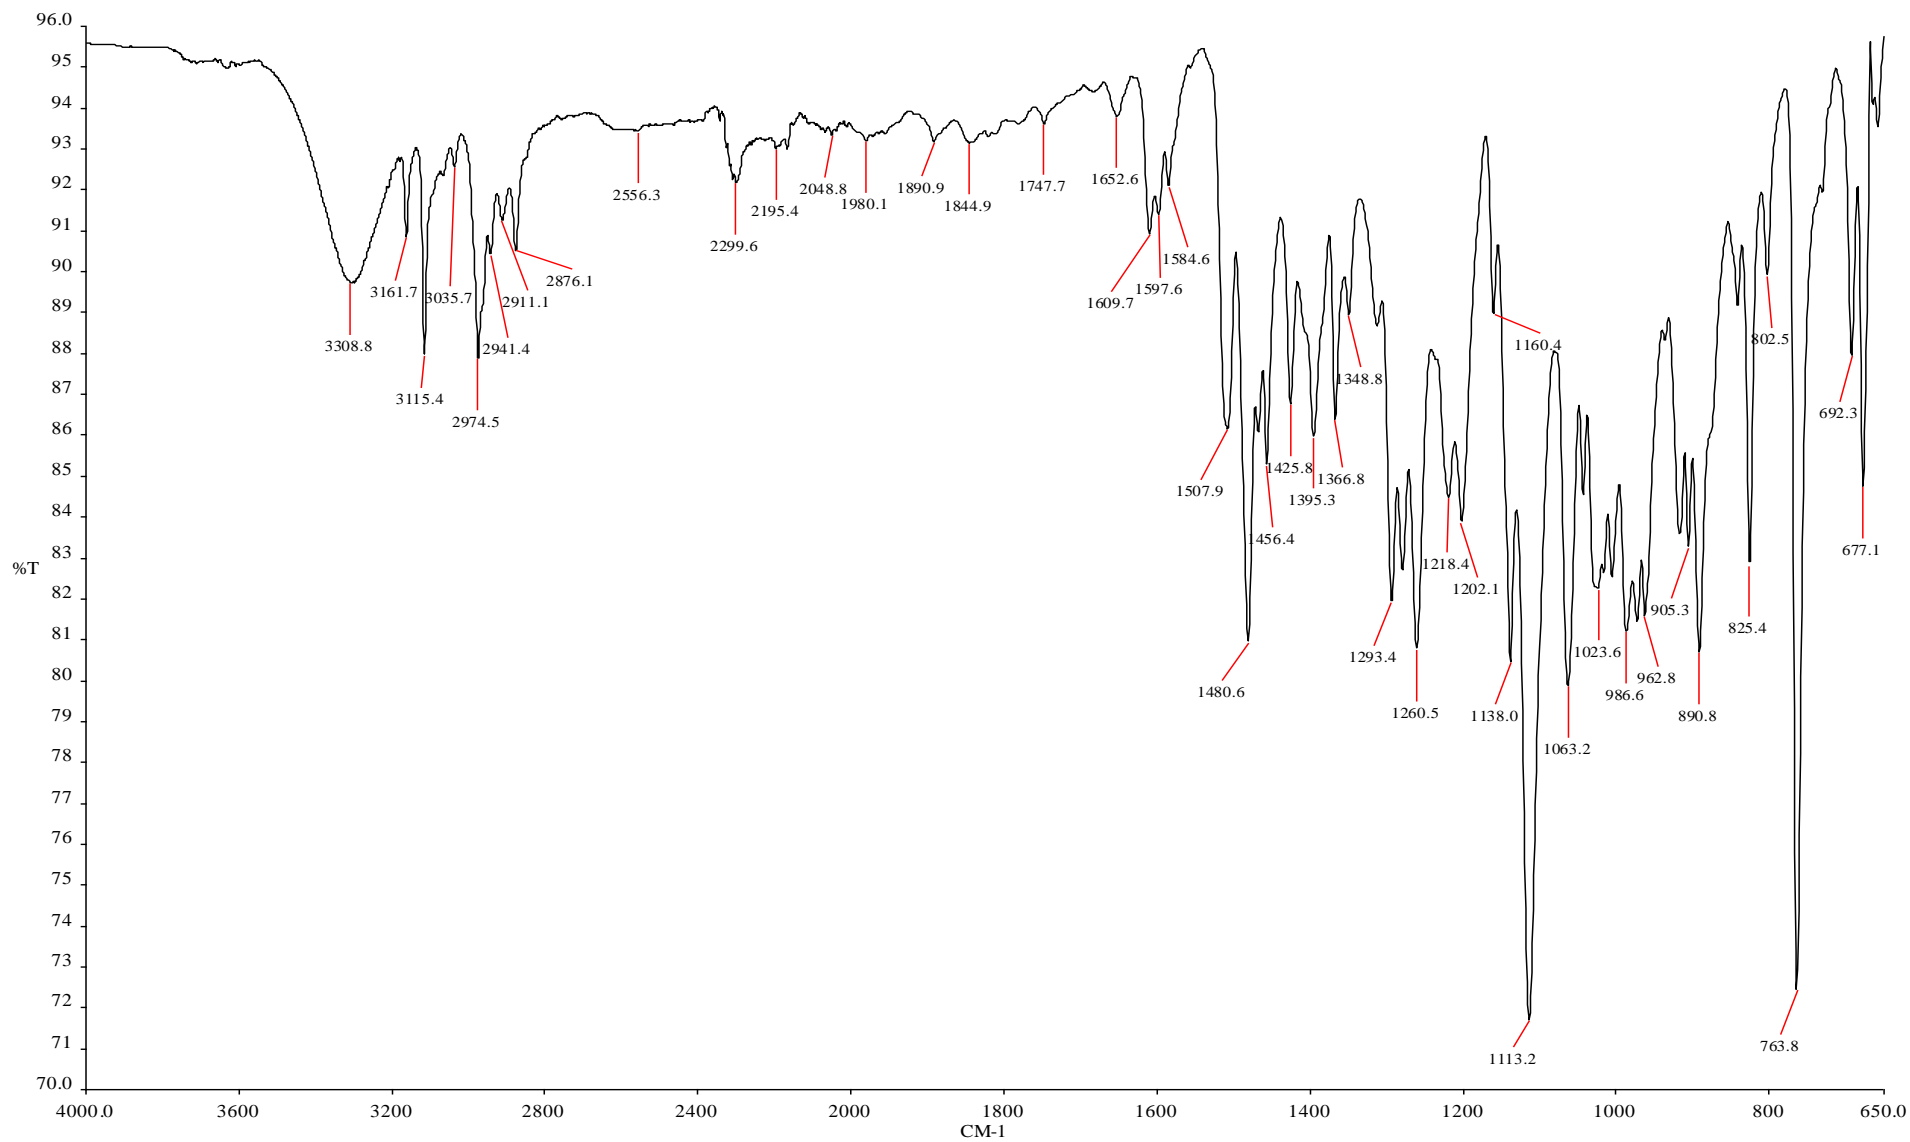

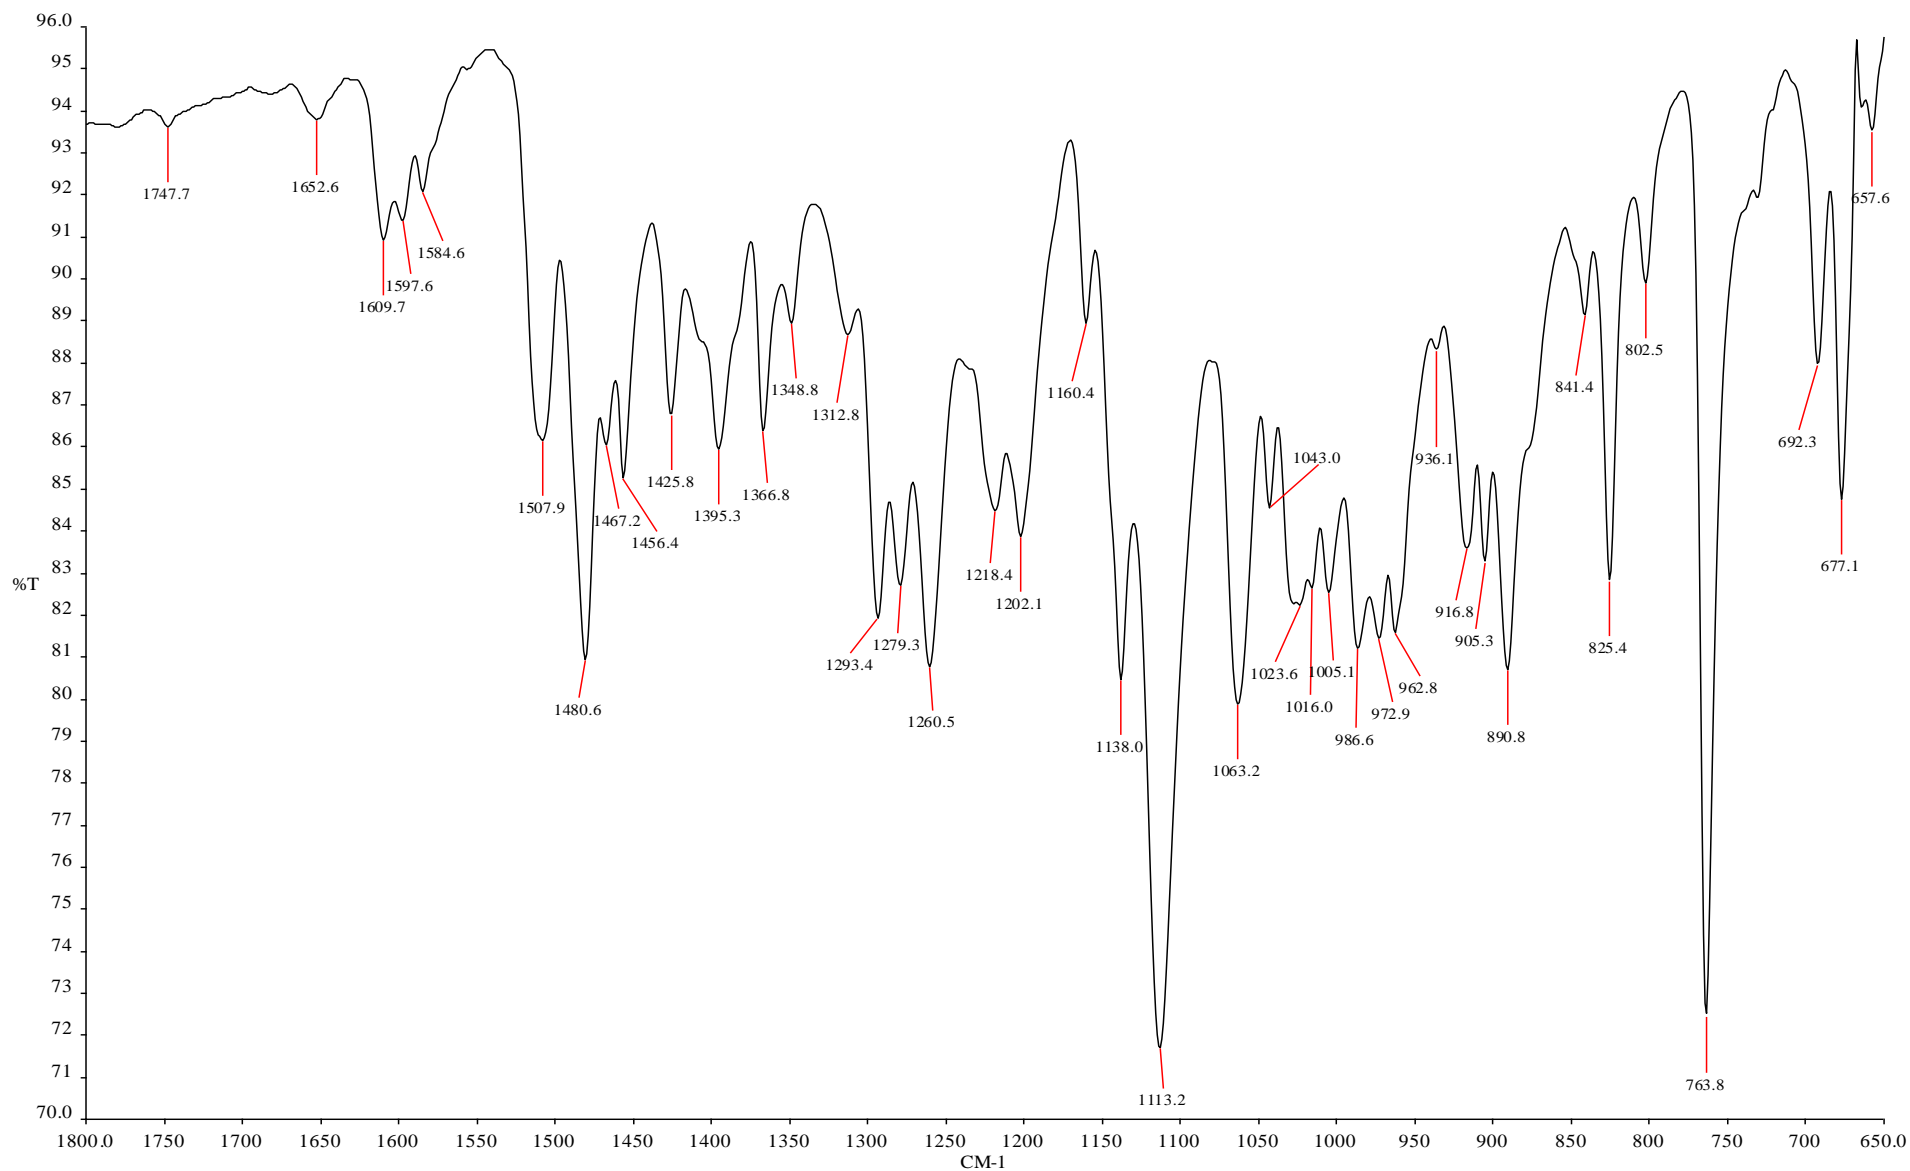

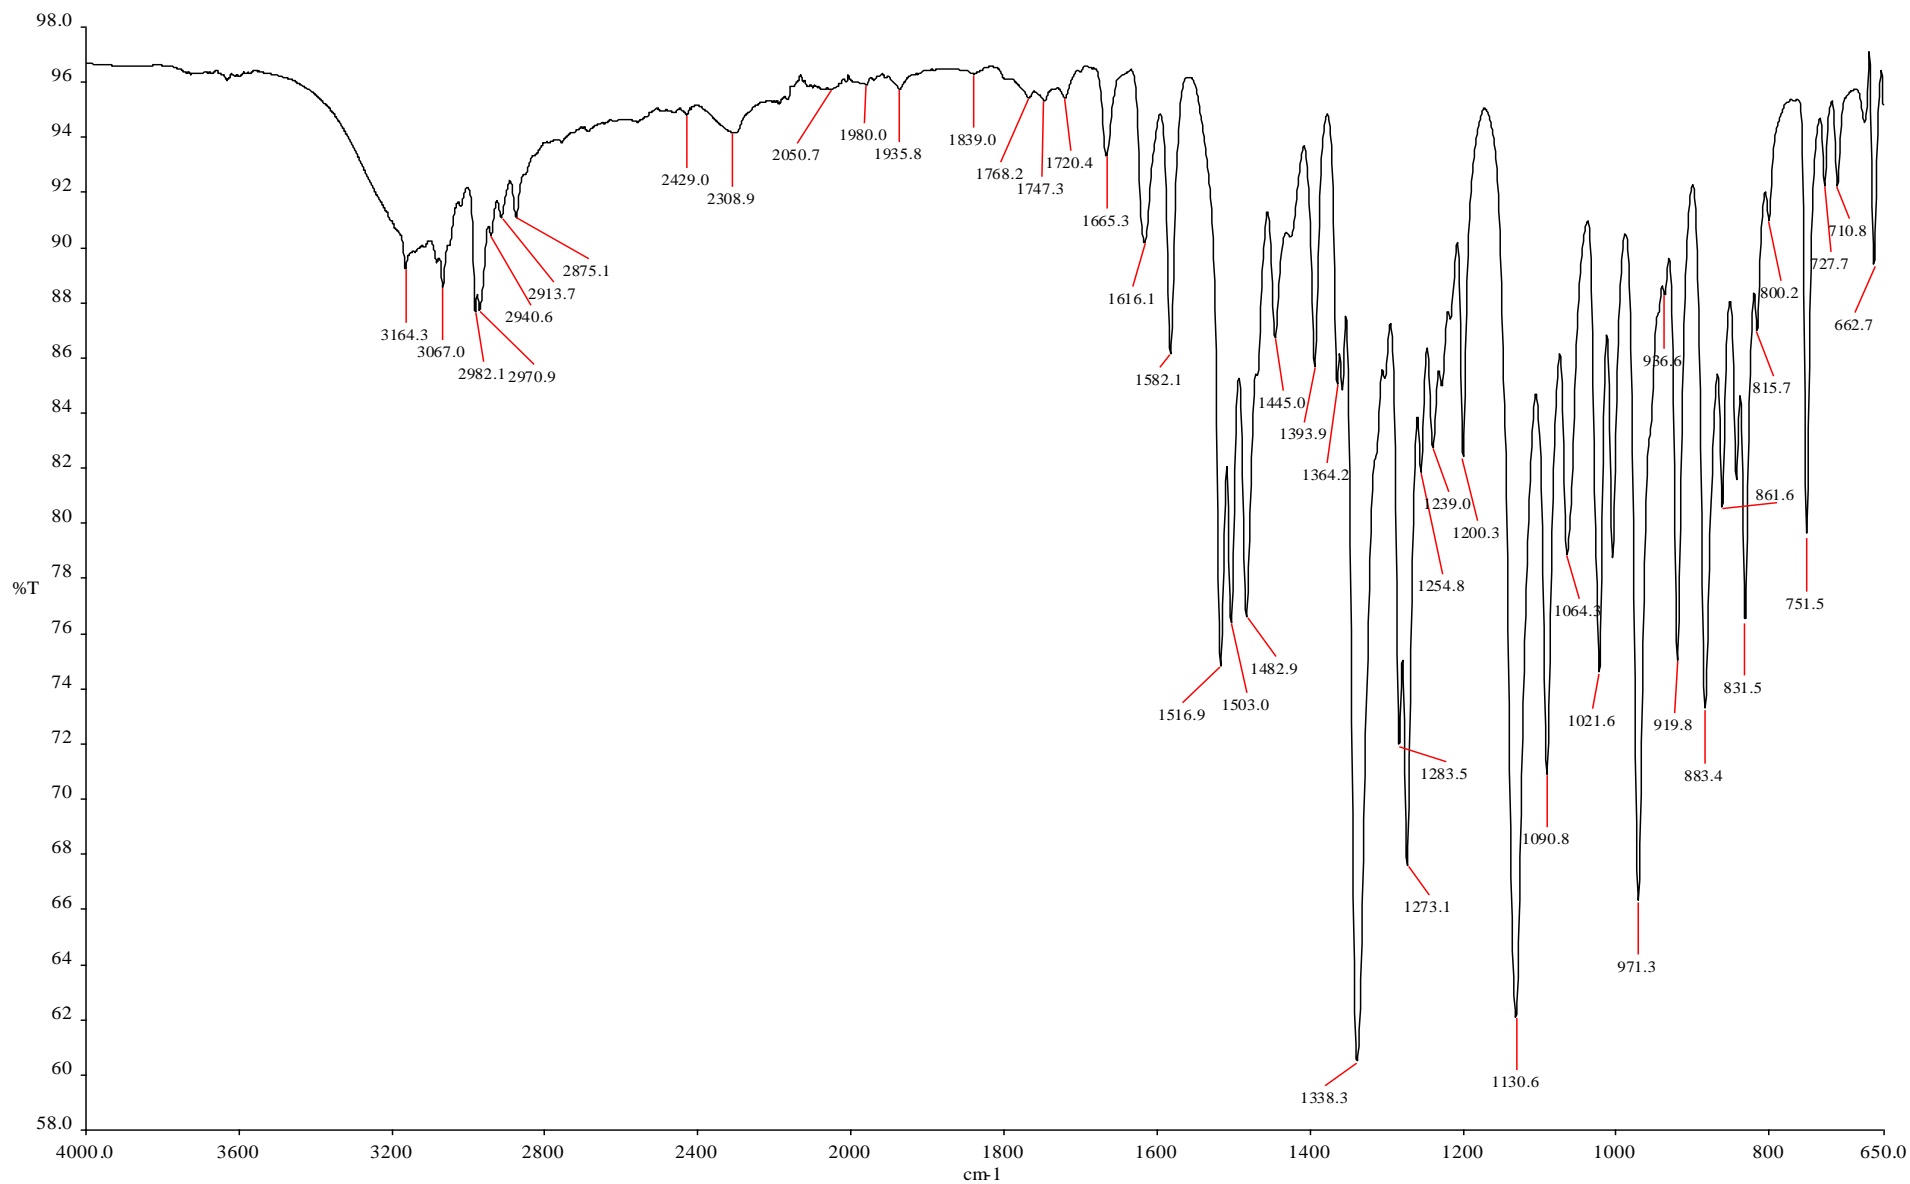

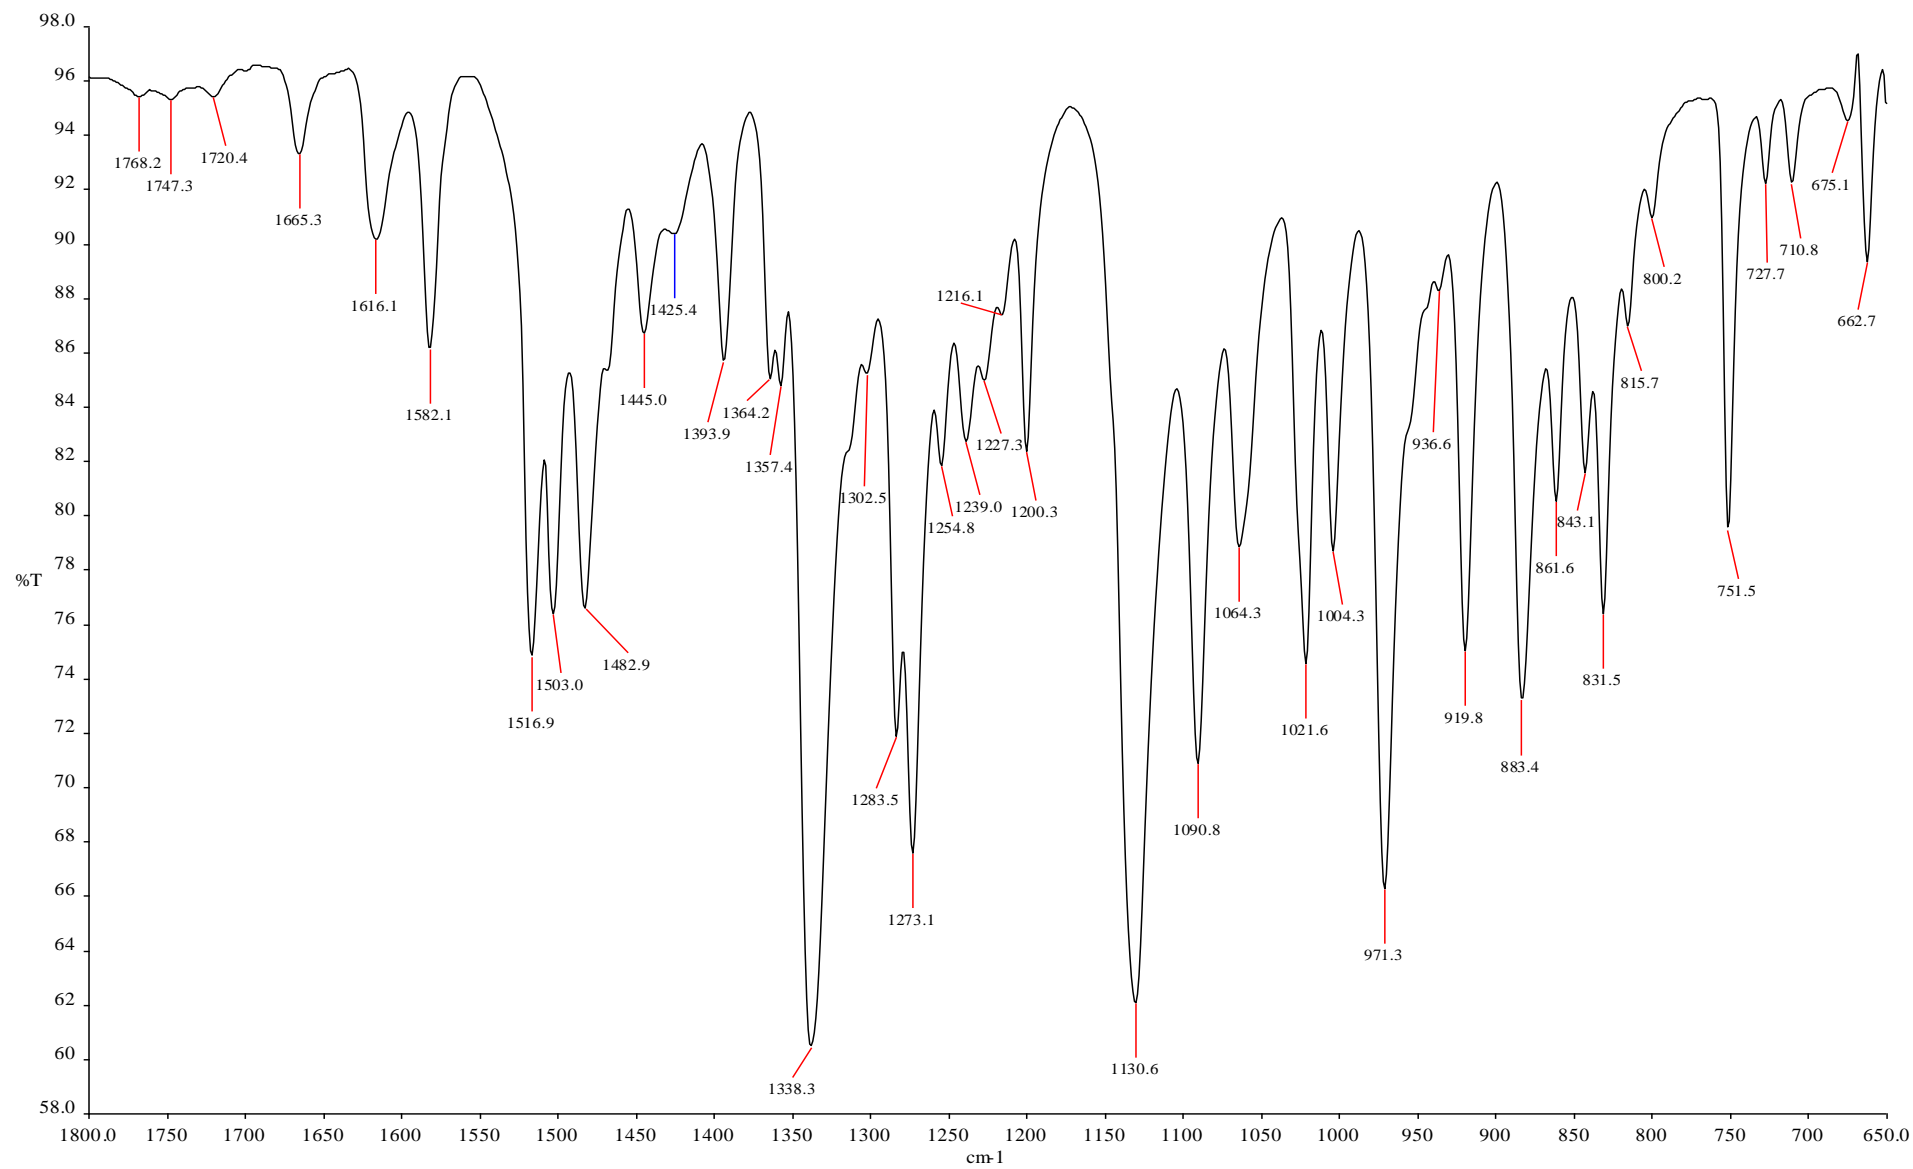

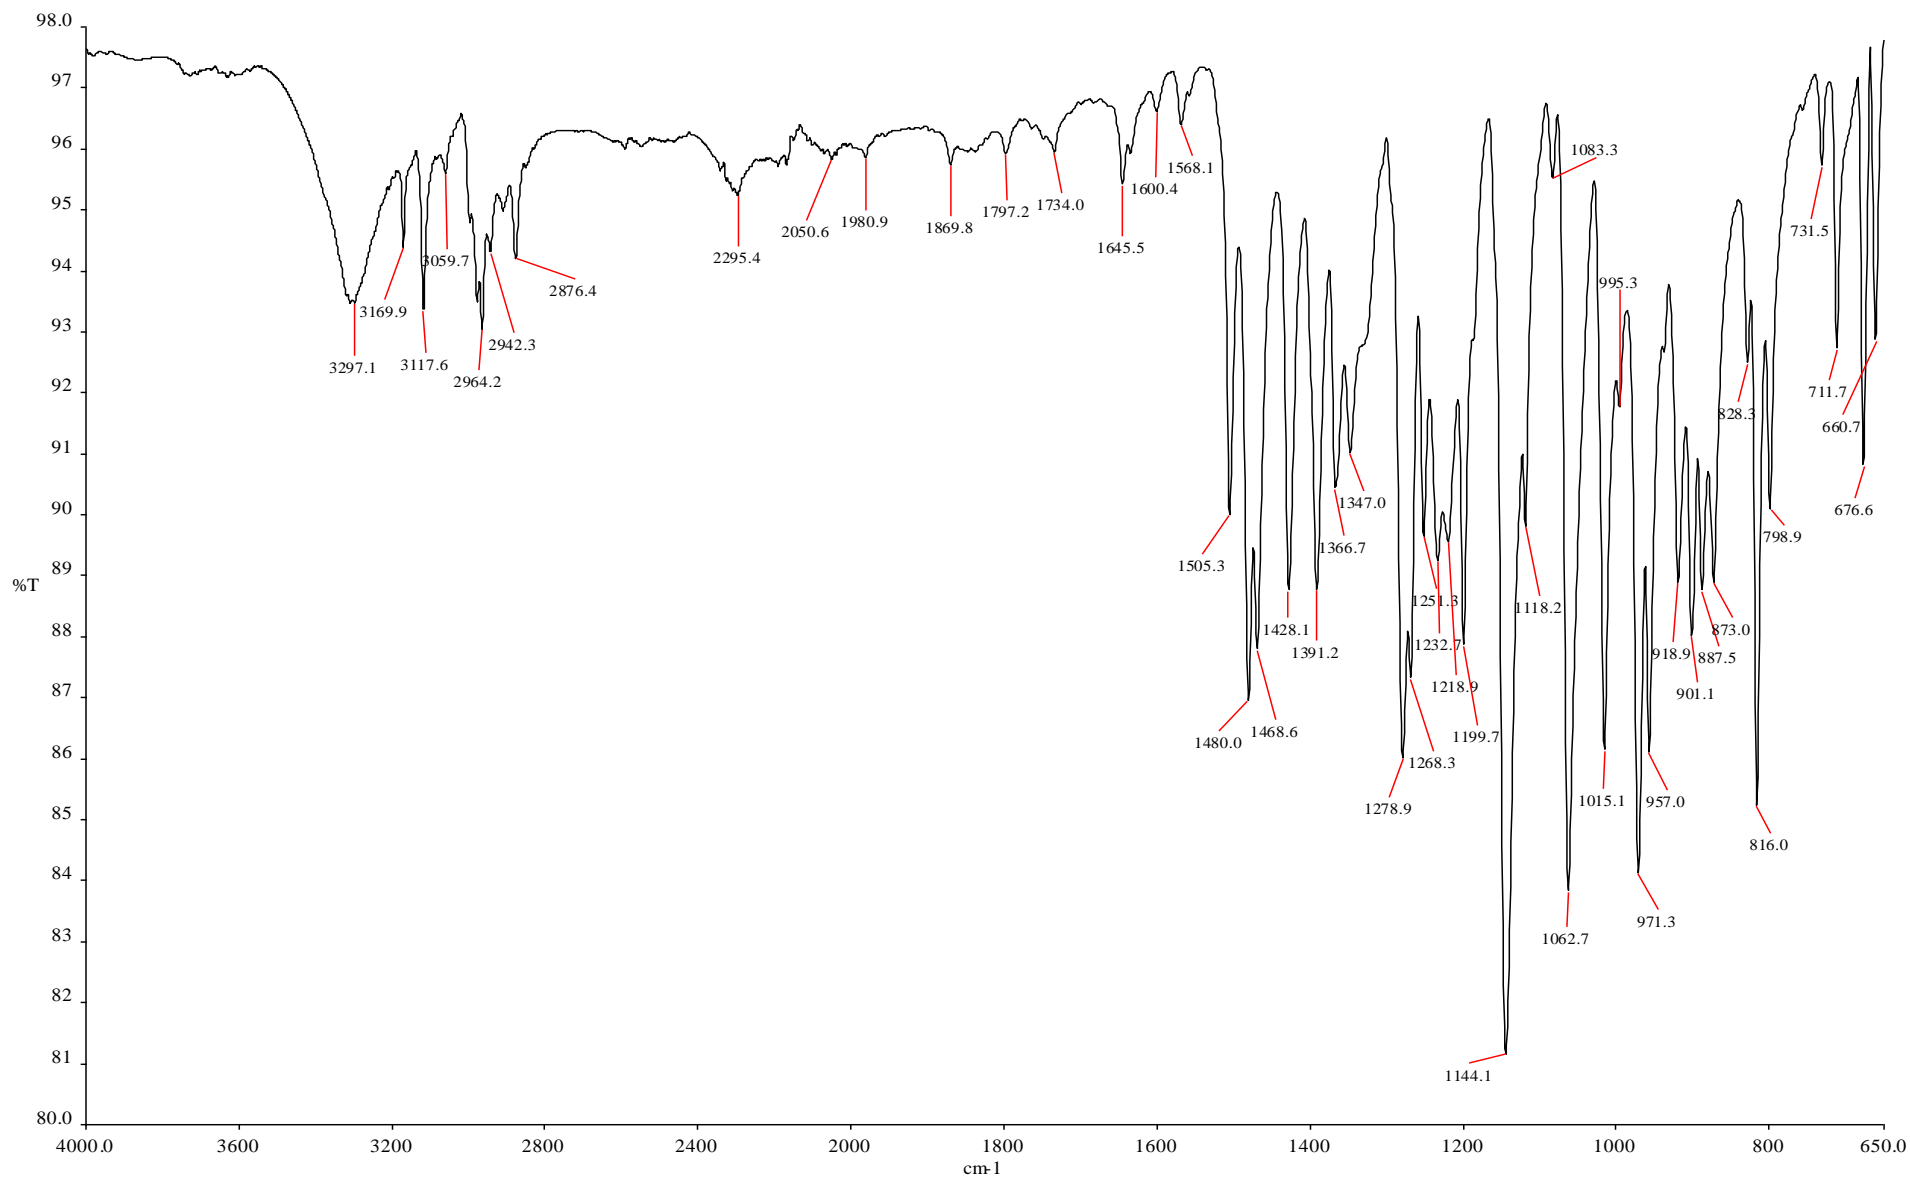

3m

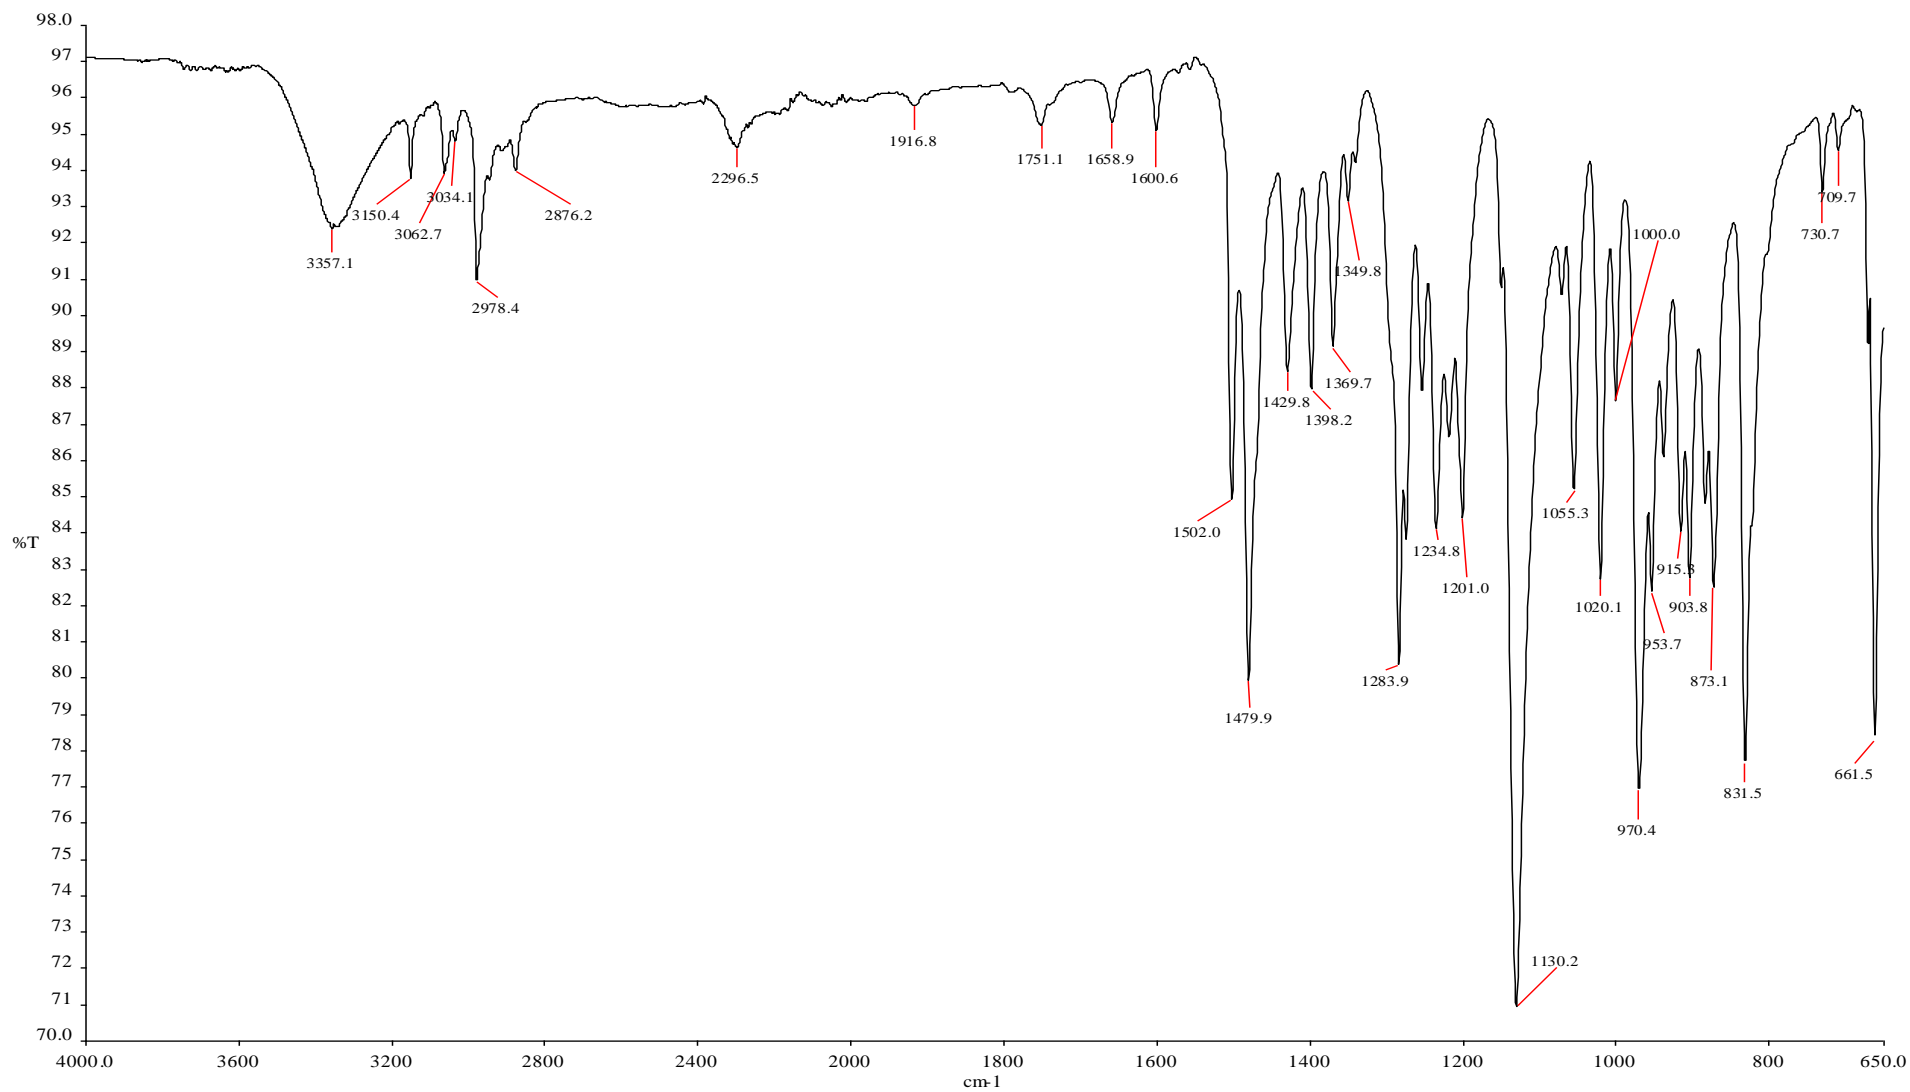

3n

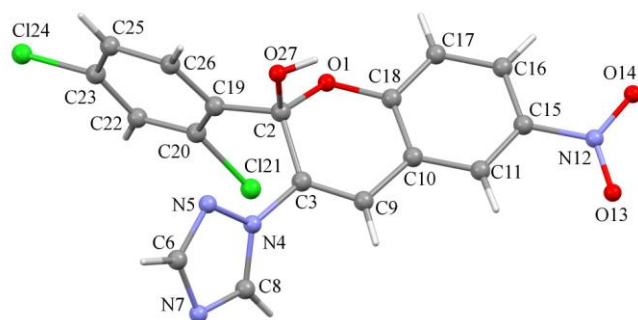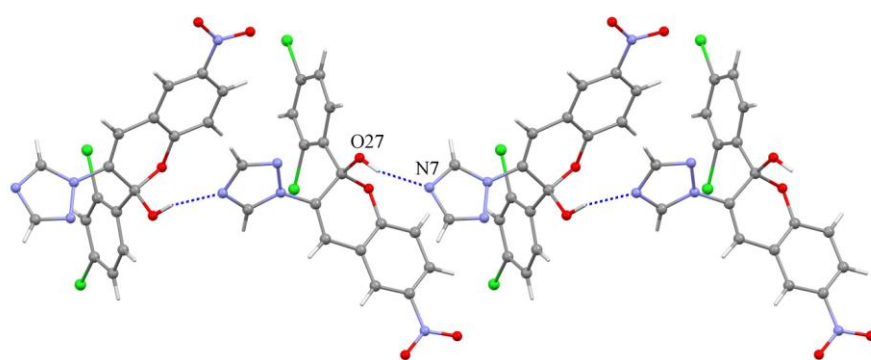

Supplement: s1 [file s1]
